# Supplementary material for: Regional and seasonal radiative forcing by perturbations to aerosol and ozone precursor emissions
Source: Copernicus journal article supplement (doi:10.5194/acp-2016-310), 2016-04-27
Supplement: Supplementary file 3 [file eclipse_t4-3_results_oslonitr_28N-60N_final.xlsx]

## Sheet: OsloCTM2
ECLIPSE T4.3 Radiative Forcing Simulations (Absolute RF in mWm-2, Normalised RF in mWm-2 Tg[species]-1)											Perturbation codes: EUS Europe Summer, EUW Europe Winter, CNS China Summer, CNW China Winter, RWS Rest of the World Summer, RWW Rest of the World Winter, SHS Shipping Summer, SHW Shipping Winter, WDS World Summer, WDW World Winter
Model:		OsloCTM2
		Latitude band 28N-60N
	Perturb	ADRF SU	ADRF NI	ADRF SOA	ADRF BC	ADRF OC	AIRF	BC_SNOW	SW O3	LW O3	CH4	PM O3	Total RF	DeltaEmi	nADRF SU	nADRF NI	nADRF SOA	nADRF BC	nADRF OC	nAIRF	nBC_SNOW	nSW O3	nLW O3	nCH4	nPM O3	Total nRF	Total SLnRF	Total LLnRF					ADRF NI/ADRF TOT			ADRF NI/AD+IRF TOT
SO2	EUS	-12.8712	0.855872				-3.55177						-15.5671	0.768	-16.7594	1.11442	0	0	0	-4.6247		0	0	0	0	-20.2697	-20.2697	0					-0.0664951			-0.0521143
	EUW	-5.12964	0.631623				-0.999726						-5.49774	0.83	-6.18029	0.760992	0	0	0	-1.20449		0	0	0	0	-6.62379	-6.62379	0					-0.123132			-0.103049
	CNS	-34.3681	3.1138				-10.9812						-42.2355	3.149	-10.914	0.988822	0	0	0	-3.4872		0	0	0	0	-13.4124	-13.4124	0					-0.0906015			-0.0686626
	CNW	-13.7205	2.88256				-4.20477						-15.0427	3.317	-4.13642	0.869026	0	0	0	-1.26764		0	0	0	0	-4.53503	-4.53503	0					-0.210091			-0.16081
	RWS	-51.7625	2.6873				-19.7209						-68.7961	5.156	-10.0393	0.521199	0	0	0	-3.82484		0	0	0	0	-13.3429	-13.3429	0					-0.051916			-0.0375933
	RWW	-21.1207	2.71944				-6.57913						-24.9804	5.15	-4.10111	0.528047	0	0	0	-1.2775		0	0	0	0	-4.85056	-4.85056	0					-0.128757			-0.0981753
	SHS	-6.82394	0.178528				-19.6636						-26.309	1.048	-6.51139	0.170351	0	0	0	-18.763		0	0	0	0	-25.104	-25.104	0					-0.026162			-0.00674007
	SHW	-3.28341	0.17015				-5.59401						-8.70727	1.031	-3.18468	0.165034	0	0	0	-5.42581		0	0	0	0	-8.44546	-8.44546	0					-0.0518211			-0.0191666
	WDS	-105.826	6.8355				-53.9175						-152.908	10.121	-10.4561	0.675378	0	0	0	-5.32729		0	0	0	0	-15.108	-15.108	0					-0.064592			-0.0427906
	WDW	-43.2542	6.40377				-17.3776						-54.2281	10.328	-4.18806	0.62004	0	0	0	-1.68258		0	0	0	0	-5.25059	-5.25059	0					-0.14805			-0.105617
NOX	EUS	-0.612333	-1.00273				-0.487116		0.501652	1.02114	-0.84	-0.277414	-1.6968	0.977	-0.626748	-1.02634	0	0	0	-0.498583		0.513462	1.04518	-0.859775	-0.283945	-1.73675	-0.593027	-1.14372					1.63756			0.91203
[NO2]	EUW	-0.143777	-1.32033				-0.250576		0.270039	0.419327	-0.42	-0.138707	-1.58402	1.029	-0.139725	-1.28312	0	0	0	-0.243514		0.262429	0.407509	-0.408163	-0.134798	-1.53938	-0.996421	-0.542961					9.18318			3.34809
	CNS	-0.697571	-1.47742				-0.354481		1.38307	2.87761	-1.78	-0.587854	-0.636646	2.023	-0.34482	-0.730311	0	0	0	-0.175225		0.683673	1.42245	-0.879881	-0.290585	-0.314704	0.855763	-1.17047					2.11795			1.40432
	CNW	0.0743599	-5.37525				-0.201705		0.650232	1.21257	-1.18	-0.389701	-5.20949	2.084	0.0356813	-2.57929	0	0	0	-0.0967874		0.312012	0.581847	-0.566219	-0.186997	-2.49976	-1.74654	-0.753216					-72.2869			42.2101
	RWS	-1.57047	-2.14065				-1.04097		3.51636	8.70468	-11.41	-3.76821	-7.70926	6.357	-0.247046	-0.336739	0	0	0	-0.163752		0.553148	1.36931	-1.79487	-0.592766	-1.21272	1.17492	-2.38764					1.36306			0.81972
	RWW	-0.455147	-4.12196				-0.509738		2.10124	4.379	-11.76	-3.8838	-14.2504	6.362	-0.0715415	-0.647903	0	0	0	-0.0801223		0.33028	0.688306	-1.84848	-0.610469	-2.23993	0.219018	-2.45894					9.05633			4.27197
	SHS	0.347534	-0.223304				-2.70681		1.27136	2.79676	-5.73	-1.89236	-6.13682	1.695	0.205035	-0.131743	0	0	0	-1.59694		0.750065	1.65001	-3.38053	-1.11644	-3.62054	0.876425	-4.49697					-0.642539			0.0946494
	SHW	0.390661	-0.374883				-0.467822		1.01516	2.15468	-6.96	-2.29858	-6.54078	1.667	0.23435	-0.224885	0	0	0	-0.280637		0.608974	1.29255	-4.17516	-1.37887	-3.92368	1.63035	-5.55403					-0.959612			4.85845
	WDS	-2.53284	-4.8441				-4.58938		6.67244	15.4002	-19.76	-6.52584	-16.1795	11.052	-0.229175	-0.438301	0	0	0	-0.415253		0.603732	1.39343	-1.78791	-0.590467	-1.46395	0.914433	-2.37838					1.91252			0.68014
	WDW	-0.133903	-11.1924				-1.42984		4.03667	8.16558	-20.32	-6.71079	-27.5847	11.142	-0.0120179	-1.00453	0	0	0	-0.128329		0.362293	0.732865	-1.82373	-0.602296	-2.47574	-0.0497145	-2.42603					83.586			7.15745
CO	EUS	0.0355672	-0.00333952	0.00400768			-0.051318		0.0475258	0.14659	0.29	0.095774	0.564807	2.348	0.0151479	-0.00142228	0.00170685	0	0	-0.021856		0.020241	0.0624319	0.123509	0.0407896	0.240548	0.0762492	0.164299					-0.0843848			0.284381
	EUW	0.016798	-0.0057213	0.00240345			-0.0676659		0.0560821	0.135206	0.46	0.151917	0.74902	3.087	0.00544153	-0.00185335	0.000778571	0	0	-0.0219196		0.0181672	0.0437985	0.149012	0.049212	0.242637	0.0444128	0.198224					-0.297962			0.118051
	CNS	0.172411	-0.0717198	0.0202995			-0.263933		0.294024	1.0626	1.57	0.518501	3.30218	12.824	0.0134444	-0.00559262	0.00158293	0	0	-0.0205812		0.0229276	0.0828603	0.122427	0.0404321	0.2575	0.0946414	0.162859					-0.372163			1.00698
	CNW	0.174513	-0.067209	0.00776803			-0.294822		0.272438	0.753477	2.51	0.82894	4.18511	16.991	0.0102709	-0.00395556	0.000457185	0	0	-0.0173517		0.0160343	0.0443457	0.147725	0.048787	0.246313	0.0498008	0.196512					-0.368711			0.597196
	RWS	0.0453323	-0.0217201	0.0256945			-0.354315		0.496537	2.61407	4.54	1.49936	8.84496	35.039	0.00129377	-0.000619884	0.000733311	0	0	-0.010112		0.014171	0.0746046	0.12957	0.0427911	0.252432	0.0800707	0.172361					-0.305801			0.0766714
	RWW	0.11814	-0.0225985	0.0110058			-0.398195		0.392842	1.39513	5.25	1.73384	8.48016	35.101	0.00336572	-0.000643814	0.000313547	0	0	-0.0113443		0.0111918	0.0397462	0.149568	0.0493957	0.241593	0.0426291	0.198964					-0.174984			0.0839939
	SHS	0.00204775	-0.000528296	-0.00125864					0.00152403	0.00808396	0.01	0.00330255	0.0231714	0.115	0.0178065	-0.00459388	-0.0109447	0	0	0		0.0132524	0.0702953	0.0869565	0.0287178	0.20149	0.0858157	0.115674					-0.669483			-0.669483
	SHW	0.000271664	0.000174859	0.000144034					0.00126071	0.00355044	0.02	0.0066051	0.0320068	0.113	0.00240411	0.00154742	0.00127464	0	0	0		0.0111567	0.0314198	0.176991	0.0584522	0.283246	0.0478027	0.235443					0.42064			0.42064
	WDS	0.25331	-0.0967794	0.0500017			-0.669566		0.838087	3.82326	6.4	2.11363	12.7119	50.211	0.00504492	-0.00192745	0.000995831	0	0	-0.013335		0.0166913	0.0761439	0.127462	0.042095	0.253171	0.0836134	0.169557					-0.319075			0.264241
	WDW	0.309451	-0.0955288	0.0211773			-0.760683		0.721362	2.28381	8.22	2.7147	13.4143	55.179	0.00560813	-0.00173125	0.000383792	0	0	-0.0137857		0.0130731	0.0413892	0.14897	0.049198	0.243105	0.0449372	0.198168					-0.288931			0.222132
VOC	EUS	-0.0545285	0.0409672	-0.221121			-0.100534		0.147089	0.32897	0.13	0.0429332	0.313776	0.200426	-0.272064	0.204401	-1.10326	0	0	-0.501603		0.733884	1.64136	0.64862	0.21421	1.56555	0.702718	0.86283					-0.148621			-0.108902
[C]	EUW	-0.121276	0.00898134	-0.177764			-0.111549		0.231875	0.382518	0.04	0.0132102	0.265996	0.237702	-0.510202	0.037784	-0.747844	0	0	-0.469281		0.975486	1.60923	0.168278	0.0555746	1.11903	0.895176	0.223852					-0.0300339			-0.0218743
VOC->C:	CNS	-0.070008	0.0250959	-0.451278			-0.183349		0.36826	1.09746	0.15	0.0495383	0.985719	0.501957	-0.13947	0.0499961	-0.899036	0	0	-0.365268		0.733648	2.18636	0.29883	0.0986902	1.96375	1.56623	0.39752					-0.0481423			-0.0356155
0.255319	CNW	-0.41954	0.0789363	-0.408804			-0.0991022		0.44384	0.882135	0.01	0.00330255	0.490768	0.631149	-0.664724	0.125068	-0.647714	0	0	-0.157019		0.703225	1.39767	0.0158441	0.0052326	0.777578	0.756501	0.0210767					-0.0952941			-0.0851115
	RWS	-0.273408	0.03377	-1.6587			-0.456202		0.70703	3.14283	1.66	0.548224	3.70354	2.14085	-0.12771	0.0157741	-0.774785	0	0	-0.213094		0.330257	1.46803	0.775393	0.256077	1.72994	0.69847	1.03147					-0.0174783			-0.0141397
	RWW	-0.202812	0.115181	-1.20713			-0.410319		0.845202	2.02364	1.6	0.528408	3.29217	2.15464	-0.0941281	0.0534572	-0.560247	0	0	-0.190435		0.392271	0.939202	0.742584	0.245242	1.52795	0.540119	0.987826					-0.081692			-0.0632772
	SHS	-0.00668889	-0.000971803	-0.00766722					0.0253611	0.0564835	0.09	0.029723	0.18624	0.0730213	-0.0916019	-0.0133085	-0.105	0	0	0		0.347311	0.773521	1.23252	0.407045	2.55048	0.910922	1.63956					0.0676926			0.0676926
	SHW	-0.00886128	0.000798619	-0.00466076					0.0325841	0.032657	0.07	0.0231179	0.145636	0.0717447	-0.123511	0.0111314	-0.0649631	0	0	0		0.454167	0.455184	0.975682	0.322224	2.02991	0.732008	1.29791					-0.0590605			-0.0590605
	WDS	-0.397944	0.0998331	-2.3311			-0.740085		1.22238	4.56926	1.94	0.640695	5.00304	2.84323	-0.139962	0.0351125	-0.819876	0	0	-0.260297		0.429926	1.60706	0.682322	0.22534	1.75963	0.851968	0.907662					-0.0365817			-0.0287776
	WDW	-0.743628	0.203099	-1.7937			-0.62097		1.52092	3.28829	1.65	0.544921	4.04893	3.02349	-0.24595	0.0671736	-0.593254	0	0	-0.205382		0.503034	1.08758	0.545727	0.180229	1.33916	0.613203	0.725956					-0.0800444			-0.0643064
BC	EUS				5.82424		-0.171751	0.0328775					5.68537	0.03	0	0	0	194.141	0	-5.72503	1.09592	0	0	0	0	189.512	189.512	0					0			0
[C]	EUW				5.51121		-0.0977271	0.759641					6.17312	0.047	0	0	0	117.26	0	-2.0793	16.1626	0	0	0	0	131.343	131.343	0					0			0
	CNS				21.8773		-0.3367	0.132997					21.6736	0.11	0	0	0	198.885	0	-3.06091	1.20906	0	0	0	0	197.033	197.033	0					0			0
	CNW				16.6367		-0.182055	1.90711					18.3618	0.177	0	0	0	93.9927	0	-1.02856	10.7746	0	0	0	0	103.739	103.739	0					0			0
	RWS				39.451		-0.552561	0.706143					39.6046	0.351	0	0	0	112.396	0	-1.57425	2.0118	0	0	0	0	112.834	112.834	0					0			0
	RWW				26.3348		-0.284843	3.66961					29.7196	0.359	0	0	0	73.356	0	-0.793435	10.2218	0	0	0	0	82.7843	82.7843	0					0			0
	SHS				1.14476		-0.174273	0.00534102					0.975828	0.012	0	0	0	95.3967	0	-14.5228	0.445085	0	0	0	0	81.319	81.319	0					0			0
	SHW				0.813756		-0.0582182	0.0526009					0.808139	0.012	0	0	0	67.813	0	-4.85152	4.38341	0	0	0	0	67.3449	67.3449	0					0			0
	WDS				68.2973		-1.23528	0.877359					67.9394	0.503	0	0	0	135.78	0	-2.45583	1.74425	0	0	0	0	135.068	135.068	0					0			0
	WDW				49.2965		-0.622843	6.38896					55.0626	0.595	0	0	0	82.8512	0	-1.0468	10.7378	0	0	0	0	92.5422	92.5422	0					0			0
OC	EUS					-1.16698	-0.287465						-1.45444	0.037	0	0	0	0	-31.54	-7.76932		0	0	0	0	-39.3093	-39.3093	0					0			0
[C]	EUW					-0.835075	-0.184179						-1.01925	0.067	0	0	0	0	-12.4638	-2.74894		0	0	0	0	-15.2127	-15.2127	0					0			0
	CNS					-3.22819	-0.744513						-3.9727	0.212	0	0	0	0	-15.2273	-3.51185		0	0	0	0	-18.7392	-18.7392	0					0			0
	CNW					-3.90529	-0.307827						-4.21312	0.366	0	0	0	0	-10.6702	-0.841057		0	0	0	0	-11.5112	-11.5112	0					0			0
	RWS					-4.33265	-1.04482						-5.37747	0.804	0	0	0	0	-5.38887	-1.29953		0	0	0	0	-6.6884	-6.6884	0					0			0
	RWW					-2.71995	-0.518307						-3.23826	0.825	0	0	0	0	-3.29691	-0.628251		0	0	0	0	-3.92516	-3.92516	0					0			0
	SHS					-0.14854							-0.14854	0.013	0	0	0	0	-11.4262	0		0	0	0	0	-11.4262	-11.4262	0					0			0
	SHW					-0.0738581							-0.0738581	0.013	0	0	0	0	-5.68139	0		0	0	0	0	-5.68139	-5.68139	0					0			0
	WDS					-8.72782	-2.0768						-10.8046	1.053	0	0	0	0	-8.28853	-1.97227		0	0	0	0	-10.2608	-10.2608	0					0			0
	WDW					-7.46031	-1.01031						-8.47063	1.258	0	0	0	0	-5.9303	-0.80311		0	0	0	0	-6.73341	-6.73341	0					0			0
NH3	EUS	0.00259561	-2.00229				-0.812512						-2.81221	0.388	0.00668972	-5.16054	0	0	0	-2.0941		0	0	0	0	-7.24795	-7.24795	0					-771.414			2.47222
	EUW	-0.000317429	-1.54116				-0.252934						-1.79441	0.384	-0.000826638	-4.01344	0	0	0	-0.658682		0	0	0	0	-4.67295	-4.67295	0					4855.13			6.08549
	CNS	0.0194374	-4.17652				-0.434872						-4.59195	1.365	0.0142399	-3.05972	0	0	0	-0.318588		0	0	0	0	-3.36407	-3.36407	0					-214.87			10.0534
	CNW	0.00709631	-6.58563				-0.252726						-6.83126	1.351	0.00525264	-4.87463	0	0	0	-0.187066		0	0	0	0	-5.05645	-5.05645	0					-928.036			26.8112
	RWS	0.013941	-4.28711				-1.02145						-5.29462	3.481	0.00400488	-1.23157	0	0	0	-0.293436		0	0	0	0	-1.52101	-1.52101	0					-307.518			4.25516
	RWW	0.0031783	-5.89713				-0.885461						-6.77941	3.426	0.0009277	-1.72129	0	0	0	-0.258453		0	0	0	0	-1.97881	-1.97881	0					-1855.44			6.68395
	WDS	0.035974	-10.4659				-2.26883						-12.6988	5.234	0.00687314	-1.9996	0	0	0	-0.43348		0	0	0	0	-2.42621	-2.42621	0					-290.93			4.68723
	WDW	0.00995718	-14.0239				-1.39112						-15.4051	5.161	0.00192931	-2.71729	0	0	0	-0.269545		0	0	0	0	-2.9849	-2.9849	0					-1408.42			10.1537
All	SHS	-6.48105	-0.0462761	-0.00892586	1.14476	-0.14854	-22.5447	0.00534102	1.29825	2.86133	-5.59	-1.84613	-31.3559	2.95602	-2.19249	-0.0156549	-0.00301955	0.387264	-0.05025	-7.6267	0.00180683	0.439187	0.967966	-1.89106	-0.624531	-10.6075	-8.09189	-2.51559					0.0084234			0.00165045
	SHW	-2.90134	-0.20376	-0.00451673	0.813756	-0.0738581	-6.12005	0.0526009	1.049	2.19089	-6.82	-2.25234	-14.2696	2.90774	-0.997797	-0.0700748	-0.00155334	0.279858	-0.0254005	-2.10474	0.0180899	0.360762	0.753466	-2.34546	-0.7746	-4.90745	-1.78739	-3.12006					0.0940736			0.0245908
CH4	Annual	-1.6724	0.022694	0.097901					8.82255	32.3916	124.795		164.457	61.2556	-0.027302	0.000370481	0.00159824	0	0	0		0.144029	0.528795	2.03728	0	2.68477	0.64749	2.03728					-0.0144135			-0.0144135
	Winter

## Sheet: NorESM
ECLIPSE T4.3 Radiative Forcing Simulations (Absolute RF in mWm-2, Normalised RF in mWm-2 Tg[species]-1)											Perturbation codes: EUS Europe Summer, EUW Europe Winter, CNS China Summer, CNW China Winter, RWS Rest of the World Summer, RWW Rest of the World Winter, SHS Shipping Summer, SHW Shipping Winter, WDS World Summer, WDW World Winter
Model:		NorESM
		Latitude band 28N-60N
	Perturb	ADRF	AIRF	SW O3	LW O3	CH4	PM O3	Total RF	DeltaEMI	nADRF	nAIRF	nSW O3	nLW O3	nCH4	nPM O3	Total nRF	Total SLnRF	Total LLnRF				ADRF NI (from TOT and CTM2 ratio)				nADRF NI
SO2	EUS	-13.0232	-7.47753					-20.5007	0.772418	-16.8603	-9.68068	0	0	0	0	-26.541	-26.541	0				0.865979				1.12113
	EUW	-5.25975	-4.68923					-9.94898	0.845032	-6.22432	-5.54917	0	0	0	0	-11.7735	-11.7735	0				0.647644				0.766413
	CNS	-40.5115	-29.7112					-70.2227	3.14062	-12.8992	-9.4603	0	0	0	0	-22.3595	-22.3595	0				3.6704				1.16869
	CNW	-14.7147	-16.5435					-31.2582	3.35299	-4.38853	-4.93396	0	0	0	0	-9.32249	-9.32249	0				3.09143				0.921993
	RWS	-62.4647	-47.871					-110.336	5.09299	-12.2648	-9.39939	0	0	0	0	-21.6642	-21.6642	0				3.24292				0.636741
	RWW	-24.9323	-30.1771					-55.1094	5.16615	-4.82609	-5.84131	0	0	0	0	-10.6674	-10.6674	0				3.21021				0.621393
	SHS							0	1.03896	0	0	0	0	0	0	0	0	0				0				0
	SHW							0	1.03896	0	0	0	0	0	0	0	0	0				0				0
	WDS	-115.999	-85.0597					-201.059	9.00603	-12.8802	-9.44476	0	0	0	0	-22.325	-22.325	0				7.49264				0.831958
	WDW	-44.9068	-51.4098					-96.3166	9.36417	-4.79559	-5.49006	0	0	0	0	-10.2856	-10.2856	0				6.64842				0.709985
NOX	EUS	-0.229941	-0.178157	0.522138	0.827254	-0.88366	-0.373824	-0.31619	0.995864	-0.230896	-0.178897	0.524307	0.83069	-0.88733	-0.375376	-0.317503	0.945203	-1.26271				-0.376541				-0.378105
[NO2]	EUW	0.442869	0.116406	0.154679	0.159526	-0.3214	-0.0658911	0.486189	1.0608	0.417486	0.109734	0.145814	0.150383	-0.302979	-0.0621146	0.458323	0.823416	-0.365093				4.06695				3.83385
	CNS	1.29929	-0.897516	1.55316	2.92651	-1.77983	-0.752939	2.34867	2.0201	0.64318	-0.444292	0.768852	1.44869	-0.881059	-0.372724	1.16265	2.41643	-1.25378				2.75183				1.36222
	CNW	0.0979414	-0.259648	0.400485	0.67663	-0.96133	-0.197085	-0.243007	2.11131	0.0463889	-0.12298	0.189686	0.320479	-0.455324	-0.0933473	-0.115098	0.433574	-0.548671				-7.07988				-3.35331
	RWS	-0.535741	-0.785052	4.39633	9.51022	-13.1557	-5.56538	-6.13529	6.27179	-0.0854208	-0.125172	0.700969	1.51635	-2.0976	-0.887367	-0.978236	2.00673	-2.98496				-0.730249				-0.116434
	RWW	2.01268	-0.279403	1.77458	3.55341	-13.868	-2.84312	-9.64989	6.37335	0.315796	-0.0438392	0.278437	0.557542	-2.17594	-0.446096	-1.5141	1.10794	-2.62203				18.2275				2.85995
	SHS							0	1.09606	0	0	0	0	0	0	0	0	0				0				0
	SHW							0	1.09606	0	0	0	0	0	0	0	0	0				0				0
	WDS	0.533608	-1.86072	6.47163	13.264	-15.8192	-6.69214	-4.1028	9.28775	0.0574529	-0.200342	0.696792	1.42812	-1.70323	-0.720534	-0.441744	1.98202	-2.42376				1.02054				0.10988
	WDW	2.55349	-0.422645	2.32974	4.38957	-15.1508	-3.1061	-9.40671	9.54546	0.267508	-0.0442771	0.244068	0.459859	-1.58722	-0.325401	-0.985463	0.927158	-1.91262				213.436				22.3599
CO	EUS	-0.000219544	0.125227	0.049898	0.0743728	0.23461	0.0992494	0.583138	2.47364	-8.87533e-05	0.0506245	0.0201719	0.0300661	0.094844	0.0401228	0.235741	0.100774	0.134967				1.85262e-05				7.48944e-06
	EUW	-0.0554156	0.319126	0.0605901	0.068218	0.34922	0.0715946	0.813333	3.10853	-0.0178269	0.102661	0.0194915	0.0219454	0.112342	0.0230316	0.261645	0.126271	0.135374				0.0165117				0.00531175
	CNS	-0.315665	1.03159	0.371396	0.903753	1.13046	0.47823	3.59976	12.9065	-0.0244578	0.0799277	0.0287758	0.0700229	0.0875882	0.0370533	0.27891	0.154269	0.124641				0.117479				0.00910228
	CNW	-0.0317766	1.36057	0.281254	0.491717	1.89796	0.389106	4.38883	17.1191	-0.00185621	0.0794767	0.0164292	0.0287233	0.110868	0.0227293	0.25637	0.122773	0.133597				0.0117164				0.000684403
	RWS	-0.243707	0.930022	0.645036	1.98169	3.24023	1.37075	7.92402	34.6446	-0.00703448	0.0268446	0.0186186	0.0572005	0.0935277	0.0395659	0.228723	0.0956293	0.133094				0.074526				0.00215116
	RWW	-0.223521	1.58687	0.455263	0.927729	3.91534	0.802695	7.46438	35.1645	-0.00635644	0.045127	0.0129467	0.0263825	0.111343	0.0228268	0.21227	0.0780998	0.13417				0.0391127				0.00111228
	SHS							0	0.114038	0	0	0	0	0	0	0	0	0				0				0
	SHW							0	0.114038	0	0	0	0	0	0	0	0	0				0				0
	WDS	-0.559592	2.08684	1.06633	2.95982	4.6053	1.94823	12.1069	50.0248	-0.0111863	0.0417161	0.021316	0.059167	0.0920603	0.0389452	0.242018	0.111013	0.131006				0.178552				0.00356927
	WDW	-0.310713	3.26657	0.797107	1.48766	6.16252	1.2634	12.6665	55.3922	-0.00560933	0.0589716	0.0143902	0.0268569	0.111253	0.0228082	0.22867	0.0946095	0.134061				0.0897747				0.00162071
VOC	EUS	-0.258585	-0.623676	0.0931699	0.148392	0.11037	0.0466909	-0.483638	0.28136	-0.919054	-2.21665	0.331141	0.52741	0.392273	0.165947	-1.71893	-2.27715	0.558221				0.0384311				0.13659
[C]	EUW	-0.481028	-1.52022	0.150839	0.170698	0.10372	0.0212639	-1.55473	0.36227	-1.32782	-4.19637	0.416372	0.47119	0.286306	0.0586964	-4.29163	-4.63663	0.345002				0.0144472				0.0398795
	CNS	-1.14872	-1.1815	0.285322	0.661769	0.1131	0.0478458	-1.22218	0.552548	-2.07895	-2.13828	0.516375	1.19767	0.204688	0.0865913	-2.2119	-2.50318	0.291279				0.055302				0.100085
	CNW	-0.909003	-0.961637	0.272457	0.393264	0.24497	0.050222	-0.909727	0.842324	-1.07916	-1.14165	0.323459	0.46688	0.290826	0.0596231	-1.08002	-1.43047	0.350449				0.0866226				0.102838
	RWS	-1.88281	-3.38629	0.624428	1.92666	1.34266	0.567999	-0.807353	4.07751	-0.461755	-0.83048	0.15314	0.472509	0.329284	0.1393	-0.198001	-0.666586	0.468585				0.0329084				0.0080707
	RWW	-1.6006	-3.93235	0.563012	0.838762	1.73918	0.356554	-2.03544	4.16575	-0.384229	-0.943971	0.135153	0.201347	0.417495	0.0855919	-0.488613	-0.9917	0.503087				0.130756				0.0313884
	SHS							0	0.209536	0	0	0	0	0	0	0	0	0				0				0
	SHW							0	0.209536	0	0	0	0	0	0	0	0	0				0				0
	WDS	-3.29012	-5.19147	1.00292	2.73682	1.56613	0.662536	-2.51317	4.91142	-0.669891	-1.05702	0.204202	0.557236	0.318875	0.134897	-0.5117	-0.965473	0.453772				0.120358				0.0245058
	WDW	-2.99063	-6.41421	0.986308	1.40272	2.08787	0.42804	-4.49989	5.37034	-0.556879	-1.19438	0.183658	0.261198	0.388778	0.0797044	-0.837916	-1.3064	0.468482				0.239383				0.044575
BC	EUS	5.74372	0.4139					6.15762	0.031786	180.7	13.0215	0	0	0	0	193.721	193.721	0				0				0
[C]	EUW	4.18273	0.258195					4.44093	0.047604	87.8651	5.42381	0	0	0	0	93.2889	93.2889	0				0				0
	CNS	30.2085	2.98689					33.1954	0.108732	277.825	27.4702	0	0	0	0	305.295	305.295	0				0				0
	CNW	17.573	1.04235					18.6153	0.177482	99.0129	5.87299	0	0	0	0	104.886	104.886	0				0				0
	RWS	51.5116	3.58971					55.1013	0.342568	150.369	10.4788	0	0	0	0	160.848	160.848	0				0				0
	RWW	37.4037	1.99197					39.3957	0.357486	104.63	5.57216	0	0	0	0	110.202	110.202	0				0				0
	SHS							0	0.012164	0	0	0	0	0	0	0	0	0				0				0
	SHW							0	0.012196	0	0	0	0	0	0	0	0	0				0				0
	WDS	87.4638	6.9905					94.4543	0.483086	181.052	14.4705	0	0	0	0	195.523	195.523	0				0				0
	WDW	59.1594	3.29251					62.4519	0.582572	101.549	5.65169	0	0	0	0	107.2	107.2	0				0				0
OC	EUS	-1.41471	-3.06777					-4.48248	0.03996	-35.4032	-76.771	0	0	0	0	-112.174	-112.174	0				0				0
[C]	EUW	-0.616114	-5.18421					-5.80032	0.0655371	-9.40099	-79.1034	0	0	0	0	-88.5044	-88.5044	0				0				0
OC->C:	CNS	-4.78649	-13.3425					-18.129	0.211923	-22.586	-62.9592	0	0	0	0	-85.5452	-85.5452	0				0				0
1.4	CNW	-4.12058	-7.87411					-11.9947	0.367731	-11.2054	-21.4127	0	0	0	0	-32.6181	-32.6181	0				0				0
	RWS	-8.26117	-17.8303					-26.0915	0.783989	-10.5374	-22.7431	0	0	0	0	-33.2804	-33.2804	0				0				0
	RWW	-5.17496	-17.4355					-22.6105	0.821396	-6.3002	-21.2267	0	0	0	0	-27.5269	-27.5269	0				0				0
	SHS							0	0.0127143	0	0	0	0	0	0	0	0	0				0				0
	SHW							0	0.0127471	0	0	0	0	0	0	0	0	0				0				0
	WDS	-14.4624	-34.2406					-48.7029	1.03587	-13.9615	-33.0548	0	0	0	0	-47.0164	-47.0164	0				0				0
	WDW	-9.91165	-30.4938					-40.4055	1.25466	-7.89985	-24.3044	0	0	0	0	-32.2042	-32.2042	0				0				0
NH3	EUS							0	-999	0	0	0	0	0	0	0	0	0				0				0
	EUW							0	-999	0	0	0	0	0	0	0	0	0				0				0
	CNS							0	-999	0	0	0	0	0	0	0	0	0				0				0
	CNW							0	-999	0	0	0	0	0	0	0	0	0				0				0
	RWS							0	-999	0	0	0	0	0	0	0	0	0				0				0
	RWW							0	-999	0	0	0	0	0	0	0	0	0				0				0
	WDS							0	-999	0	0	0	0	0	0	0	0	0				0				0
	WDW							0	-999	0	0	0	0	0	0	0	0	0				0				0
All	SHS	-8.31462	-24.0666	0.781926	1.62838	-4.27817	-1.80984	-36.0589	2.47131	-3.36446	-9.7384	0.316402	0.658914	-1.73114	-0.73234	-14.591	-12.1275	-2.46348				-0.0700374				-0.0283402
	SHW	-3.76684	-11.8605	0.839414	1.55068	-5.25084	-1.07649	-19.5646	2.47135	-1.52421	-4.79921	0.339659	0.627464	-2.12469	-0.435589	-7.91657	-5.35629	-2.56028				-0.35436				-0.143388
CH4	Summer	-0.872792	9.97996	6.39402	14.919	50.3806		80.8008	36.5239	-0.0238964	0.273244	0.175064	0.408472	1.37939	0	2.21227	0.832884	1.37939				0.01258				0.000344431
	Winter	-1.20715	3.51336	3.2914	6.75414	48.9996		61.3513	35.2606	-0.0342351	0.0996399	0.0933451	0.191549	1.38964	0	1.73994	0.350299	1.38964				0				0

## Sheet: HadGEM3
ECLIPSE T4.3 Radiative Forcing Simulations (Absolute RF in mWm-2, Normalised RF in mWm-2 Tg[species]-1)											Perturbation codes: EUS Europe Summer, EUW Europe Winter, CNS China Summer, CNW China Winter, RWS Rest of the World Summer, RWW Rest of the World Winter, SHS Shipping Summer, SHW Shipping Winter, WDS World Summer, WDW World Winter
Model:		HadGEM3									Note: Methane RF is Delta[CH4]_ppb * RF/ppb, increased by 15% to represent stratospheric water changes
		Latitude band 28N-60N									Note: Primary mode ozone RF is DeltaCH4(ppb) * [Ozone RF / DeltaCH4(ppb)]_in_CH4_perturb
	Perturb	ARF	SW+LW O3	CH4	PM O3	Total RF	DeltaEmi	nARF	nSW+LW O3	nCH4	nPM O3	Total nRF	Total SLnRF	Total LLnRF												ADRF NI (from TOT and CTM2 ratio)				nADRF NI
SO2	EUS	45.6057				45.6057	-0.771942	-59.0792	0	0	0	-59.0792	-59.0792	0												-2.37671				3.07887
	EUW	14.2526				14.2526	-0.845543	-16.8562	0	0	0	-16.8562	-16.8562	0												-1.46871				1.737
	CNS	115.246				115.246	-3.14065	-36.695	0	0	0	-36.695	-36.695	0												-7.91309				2.51957
	CNW	31.1241				31.1241	-3.35314	-9.28208	0	0	0	-9.28208	-9.28208	0												-5.00506				1.49265
	RWS	207.054				207.054	-4.61614	-44.8544	0	0	0	-44.8544	-44.8544	0												-7.78385				1.68623
	RWW	84.5626				84.5626	-4.68146	-18.0633	0	0	0	-18.0633	-18.0633	0				Cells below are used to compute columns E and F:								-8.30196				1.77337
	SHS					0	-999	0	0	0	0	0	0	0												0				0
	SHW					0	-999	0	0	0	0	0	0	0				Delta[CH4]_ppb		RF/ppb		OzoneRF/DeltaCH4_o3_perturb				0				0
	WDS	367.906				367.906	-8.52873	-43.1372	0	0	0	-43.1372	-43.1372	0												-15.7429				1.84586
	WDW	129.939				129.939	-8.88014	-14.6326	0	0	0	-14.6326	-14.6326	0												-13.7238				1.54545
NOX	EUS	1.77709	-1.29545	0.584898	0.20469	1.27123	-0.996201	-1.78387	1.30039	-0.587128	-0.20547	-1.27607	-0.483477	-0.792598				1.40112		0.363		0.147939				1.62076				-1.62694
[NO2]	EUW	-0.391955	-0.290958	0.22707	0.0794649	-0.376378	-1.06187	0.369118	0.274005	-0.21384	-0.0748348	0.354449	0.643123	-0.288674				0.543945		0.363		0.145589				-1.3123				1.23584
	CNS	5.24763	-4.47246	1.26346	0.442157	2.48079	-2.02965	-2.58549	2.20356	-0.622501	-0.217849	-1.22227	-0.381923	-0.84035				3.02661		0.363		0.145589				7.36936				-3.63085
	CNW	1.96238	-1.27425	0.659654	0.230851	1.57864	-2.13188	-0.920493	0.597712	-0.309424	-0.108285	-0.74049	-0.322781	-0.417709				1.5802		0.363		0.145589				82.8323				-38.8541
	RWS	10.013	-11.6458	11.3	3.95454	13.6218	-7.17435	-1.39567	1.62326	-1.57506	-0.551205	-1.89868	0.227589	-2.12627				27.0692		0.363		0.145589				8.20786				-1.14406
	RWW	3.21153	-4.50638	10.8081	3.78237	13.2956	-6.68958	-0.480079	0.673642	-1.61566	-0.565412	-1.98751	0.193562	-2.18107				25.8907		0.363		0.145589				13.7196				-2.05089
	SHS					0	-999	0	0	0	0	0	0	0												0				0
	SHW					0	-999	0	0	0	0	0	0	0												0				0
	WDS	17.0377	-17.4137	13.1484	4.60138	17.3738	-10.2002	-1.67033	1.70719	-1.28903	-0.451107	-1.70328	0.036861	-1.74014												11.588				-1.13606
	WDW	4.78195	-6.07159	11.6948	4.09269	14.4979	-9.88333	-0.48384	0.614326	-1.18329	-0.4141	-1.4669	0.130486	-1.59739												34.2266				-3.46306
CO	EUS	-0.929727	-0.197548	-0.158684	-0.0555327	-1.34149	-2.43213	0.382269	0.0812243	0.0652449	0.022833	0.551571	0.463493	0.0880778				-0.380127		0.363		0.145589				-0.264397				0.10871
	EUW	-0.737486	-0.190004	-0.253568	-0.0887382	-1.2698	-3.18188	0.231777	0.0597144	0.0796914	0.0278886	0.399071	0.291491	0.10758				-0.607422		0.363		0.145589				-0.0870613				0.0273616
	CNS	-5.61404	-1.78209	-0.751276	-0.262915	-8.41032	-13.0988	0.428592	0.13605	0.0573546	0.0200717	0.642068	0.564642	0.0774263				-1.79968		0.363		0.145589				-5.65324				0.431585
	CNW	-5.792	-1.34865	-1.31732	-0.461007	-8.91898	-17.5773	0.329516	0.0767268	0.0749445	0.0262274	0.507415	0.406243	0.101172				-3.15564		0.363		0.145589				-3.45896				0.196786
	RWS	-6.99143	-3.04964	-4.09761	-1.43399	-15.5727	-64.3906	0.108578	0.0473616	0.0636367	0.0222702	0.241847	0.15594	0.0859069				-9.8158		0.363		0.145589				-0.536043				0.00832486
	RWW	-6.6402	-2.09233	-4.00129	-1.40028	-14.1341	-51.4021	0.129181	0.0407051	0.077843	0.0272418	0.274971	0.169887	0.105085				-9.58508		0.363		0.145589				-0.557737				0.0108505
	SHS					0	-999	0	0	0	0	0	0	0												0				0
	SHW					0	-999	0	0	0	0	0	0	0												0				0
	WDS	-13.5352	-5.02928	-5.00757	-1.75244	-25.3245	-79.9215	0.169356	0.0629277	0.062656	0.021927	0.316867	0.232284	0.084583												-3.57656				0.0447509
	WDW	-13.1697	-3.63098	-5.57218	-1.95003	-24.3229	-72.1613	0.182503	0.0503176	0.0772184	0.0270232	0.337063	0.232821	0.104242												-2.92541				0.0405398
VOC	EUS	-0.135877	-0.072593	-0.0249186	-0.00872046	-0.242109	-0.0563011	2.4134	1.28937	0.442595	0.15489	4.30025	3.70277	0.597485				-0.0596924		0.363		0.145589				0.0147973				-0.262824
[C]	EUW	-0.722499	-0.0787725	-0.0233898	-0.00818546	-0.832847	-0.0668507	10.8077	1.17833	0.349882	0.122444	12.4583	11.986	0.472326				-0.0560303		0.363		0.145589				0.0158041				-0.23641
	CNS	-0.617591	-0.302033	-0.0466776	-0.0163352	-0.982637	-0.145189	4.2537	2.08027	0.321495	0.11251	6.76798	6.33398	0.434005				-0.111816		0.363		0.145589				0.0219958				-0.151498
	CNW	-0.287497	-0.247358	-0.0886672	-0.0310298	-0.654552	-0.189049	1.52075	1.30843	0.469017	0.164136	3.46234	2.82919	0.633153				-0.212402		0.363		0.145589				0.0244693				-0.129434
	RWS	-0.845079	-0.891034	-0.53975	-0.18889	-2.46475	-1.44339	0.585482	0.61732	0.373946	0.130865	1.70761	1.2028	0.504812				-1.29297		0.363		0.145589				0.0119492				-0.00827854
	RWW	-1.23067	-0.676039	-0.578632	-0.202497	-2.68784	-1.05804	1.16316	0.638954	0.54689	0.191389	2.54039	1.80211	0.738279				-1.38611		0.363		0.145589				0.0778733				-0.0736015
	SHS					0	-999	0	0	0	0	0	0	0												0				0
	SHW					0	-999	0	0	0	0	0	0	0												0				0
	WDS	-1.59855	-1.26566	-0.611347	-0.213946		-1.64488	0.971832	0.769454	0.371666	0.130068	0	1.74129	0.501734												0.0460023				-0.027967
	WDW	-2.24067	-1.00217	-0.690689	-0.241712		-1.31394	1.7053	0.762721	0.525662	0.18396	0	2.46802	0.709622												0.144089				-0.109662
BC	EUS	-9.06029				-9.06029	-0.031302	289.448	0	0	0	289.448	289.448	0												0				0
[C]	EUW	-2.94711				-2.94711	-0.048614	60.6227	0	0	0	60.6227	60.6227	0												0				0
	CNS	-38.1554				-38.1554	-0.11036	345.736	0	0	0	345.736	345.736	0												0				0
	CNW	-12.4041				-12.4041	-0.177213	69.9954	0	0	0	69.9954	69.9954	0												0				0
	RWS	-77.2702				-77.2702	-0.31334	246.602	0	0	0	246.602	246.602	0												0				0
	RWW	-26.3573				-26.3573	-0.321528	81.9751	0	0	0	81.9751	81.9751	0												0				0
	SHS					0	-999	0	0	0	0	0	0	0												0				0
	SHW					0	-999	0	0	0	0	0	0	0												0				0
	WDS	-124.486				-124.486	-0.455002	273.594	0	0	0	273.594	273.594	0												0				0
	WDW	-41.7085				-41.7085	-0.547355	76.2001	0	0	0	76.2001	76.2001	0												0				0
OC	EUS	2.73655				2.73655	-0.0394859	-69.3045	0	0	0	-69.3045	-69.3045	0												0				0
[C]	EUW	1.91255				1.91255	-0.0689392	-27.7426	0	0	0	-27.7426	-27.7426	0												0				0
OC->C:	CNS	5.47426				5.47426	-0.215149	-25.444	0	0	0	-25.444	-25.444	0												0				0
1.4	CNW	1.03887				1.03887	-0.367132	-2.82969	0	0	0	-2.82969	-2.82969	0												0				0
	RWS	16.9034				16.9034	-0.743451	-22.7364	0	0	0	-22.7364	-22.7364	0												0				0
	RWW	9.90156				9.90156	-0.76317	-12.9743	0	0	0	-12.9743	-12.9743	0												0				0
	SHS					0	-999	0	0	0	0	0	0	0												0				0
	SHW					0	-999	0	0	0	0	0	0	0												0				0
	WDS	25.1142				25.1142	-0.998086	-25.1624	0	0	0	-25.1624	-25.1624	0												0				0
	WDW	12.853				12.853	-1.19924	-10.7176	0	0	0	-10.7176	-10.7176	0												0				0
NH3	EUS					0	-999	0	0	0	0	0	0	0												0				0
	EUW					0	-999	0	0	0	0	0	0	0												0				0
	CNS					0	-999	0	0	0	0	0	0	0												0				0
	CNW					0	-999	0	0	0	0	0	0	0												0				0
	RWS					0	-999	0	0	0	0	0	0	0												0				0
	RWW					0	-999	0	0	0	0	0	0	0												0				0
	WDS					0	-999	0	0	0	0	0	0	0												0				0
	WDW					0	-999	0	0	0	0	0	0	0												0				0
All	SHS	16.948	-3.46522	4.03202	1.41104	18.9258	-2.81	-6.03132	1.23317	-1.43488	-0.502148	-6.73517	-4.79814	-1.93703				9.65869		0.363		0.145589				0.0279719				-0.0099544
	SHW	13.9326	-2.59128	5.03411	1.76173	18.1372	-2.81	-4.95822	0.922164	-1.7915	-0.626949	-6.45451	-4.03606	-2.41845				12.0592		0.363		0.145589				0.342614				-0.121927
CH4	Annual	-53.947	-49.4115	-141.193		-244.551	-117.113	0.460641	0.421914	1.20561	0	2.08817	0.882555	1.20561												0.777564				-0.00663944
	N/A					0	-999	0	0	0	0	0	0	0												0				0

## Sheet: ECHAM6
ECLIPSE T4.3 Radiative Forcing Simulations (Absolute RF in mWm-2, Normalised RF in mWm-2 Tg[species]-1)											Perturbation codes: EUS Europe Summer, EUW Europe Winter, CNS China Summer, CNW China Winter, RWS Rest of the World Summer, RWW Rest of the World Winter, SHS Shipping Summer, SHW Shipping Winter, WDS World Summer, WDW World Winter
Model:		ECHAM6-HAMMOZ
		Latitude band 28N-60N
	Perturb	ADRF	AIRF	Total RF	DeltaEmi	nADRF	nAIRF	Total nRF	Total SLnRF	Total LLnRF							ADRF NI (from TOT and CTM2 ratio)				nADRF NI
SO2	EUS	-7.65245		-7.65245	0.754654	-10.1403	0	-10.1403	-10.1403	0							0.508851				0.674283
	EUW	-2.72364		-2.72364	0.822845	-3.31003	0	-3.31003	-3.31003	0							0.335367				0.40757
	CNS	-13.6888		-13.6888	3.07068	-4.45791	0	-4.45791	-4.45791	0							1.24023				0.403893
	CNW	-6.14757		-6.14757	3.26286	-1.8841	0	-1.8841	-1.8841	0							1.29155				0.395834
	RWS	-23.2655		-23.2655	4.97903	-4.6727	0	-4.6727	-4.6727	0							1.20785				0.242588
	RWW	-9.71065		-9.71065	5.02554	-1.93226	0	-1.93226	-1.93226	0							1.25032				0.248792
	SHS				1.24748												0				0
	SHW				1.23947												0				0
	WDS	-44.6068		-44.6068	8.80436	-5.06644	0	-5.06644	-5.06644	0							2.88124				0.327251
	WDW	-18.5819		-18.5819	9.11125	-2.03944	0	-2.03944	-2.03944	0							2.75104				0.301939
NOX	EUS
[NO2]	EUW
	CNS
	CNW
	RWS
	RWW
	SHS
	SHW
	WDS
	WDW
CO	EUS
	EUW
	CNS
	CNW
	RWS
	RWW
	SHS
	SHW
	WDS
	WDW
VOC	EUS
[C]	EUW
	CNS
	CNW
	RWS
	RWW
	SHS
	SHW
	WDS
	WDW
BC	EUS	2.61187		2.61187	0.03122	83.6602	0	83.6602	83.6602	0
[C]	EUW	1.36132		1.36132	0.0485559	28.0361	0	28.0361	28.0361	0
	CNS	4.38948		4.38948	0.110691	39.6553	0	39.6553	39.6553	0
	CNW	4.91233		4.91233	0.177134	27.7323	0	27.7323	27.7323	0
	RWS	8.50287		8.50287	0.3494	24.3356	0	24.3356	24.3356	0
	RWW	5.33412		5.33412	0.358214	14.8909	0	14.8909	14.8909	0
	SHS				0.0147238
	SHW				0.0146251
	WDS	15.5042		15.5042	0.491311	31.5568	0	31.5568	31.5568	0
	WDW	11.6078		11.6078	0.583904	19.8796	0	19.8796	19.8796	0
OC	EUS	-0.327648		-0.327648	0.0373764	-8.76617	0	-8.76617	-8.76617	0
[C]	EUW	-0.204912		-0.204912	0.0686226	-2.98607	0	-2.98607	-2.98607	0
OC->C:	CNS	-0.653194		-0.653194	0.215786	-3.02705	0	-3.02705	-3.02705	0
1.4	CNW	-0.997325		-0.997325	0.367085	-2.71688	0	-2.71688	-2.71688	0
	RWS	-0.690806		-0.690806	0.801567	-0.861819	0	-0.861819	-0.861819	0
	RWW	-0.45004		-0.45004	0.822269	-0.547315	0	-0.547315	-0.547315	0
	SHS				0.0156937
	SHW				0.0156975
	WDS	-1.67165		-1.67165	1.05473	-1.58491	0	-1.58491	-1.58491	0
	WDW	-1.65228		-1.65228	1.25798	-1.31344	0	-1.31344	-1.31344	0
NH3	EUS
	EUW
	CNS
	CNW
	RWS
	RWW
	WDS
	WDW
All	SHS	-4.51496		-4.51496	1.2779	-3.53312	0	-3.53312	-3.53312	0
	SHW	-1.70032		-1.70032	1.26979	-1.33905	0	-1.33905	-1.33905	0
CH4	Summer
	Winter

## Sheet: Methane
Model	tau_OH_Control(yr)	tau_OH_perturb(yr)	tau_CH4_control(yr)	tau_CH4_perturb(yr)	Burden_Control(Tg[CH4])	Burden_Perturb(Tg[CH4])	DeltaBurden(Tg[CH4])	s	f	DeltaEmiss(Tg[CH4]/yr)	CH4_VMR_control(ppbv)	CH4_VMR_perturb(ppbv)	RF_CH4(Wm-2)	NRF_CH4(mWm-2/Tg[CH4])	NRF_SWV(mWm-2/Tg[CH4])	RF_Ozone(mWm-2)	NRF_Ozone(mWm-2/Tg[CH4]/yr)	NRF_O3/NRF_CH4
OsloCTM2	10.2429	9.61573	8.91171	8.43316	4909.33	4115.04	794.299	0.312737	1.45505	61.2556	1728.18	1448.57	0.108517	1.77155	0.265732	41.2141	0.672823	0.379793
HadGEM3	5.96	5.63	5.4834	5.20283	4560.8	3702.4	858.4	0.251891	1.3367	117.113	1605.49	1303.32	0.122776	1.04836	0.157254	49.4115	0.421914	0.402452
NorESM(S)	7.8	7.67	7.00337	6.89839	4814.81	4488.79	326.02	0.215415	1.27456	36.5239	1694.91	1580.14	0.0438092	1.19947	0.17992	21.313	0.583536	0.486496
NorESM(W)	7.8	7.67	7.00337	6.89839	4814.81	4497.57	317.24	0.22159	1.28467	35.2606	1694.91	1583.23	0.0426083	1.20838	0.181258	10.0455	0.284895	0.235765
													Formula in Table 3 of Myhre et al. (1998)		Stratospheric water vapour contribution (extra 15% Myhre et al., 2007)
tau_strat	120	yr
tau_soil	160	yr
Matm	5130000	Tg (assumes methane is well mixed throughout the atmosphere)
m_dry_air	28.966
m_methane	16.04
factor	0.35202	Conversion burden (Tg) to vmr (ppbv)
C0	1788	Reference methane mass-mixing ratio (ppb) (WMO Ozone Assessment Report)
N2O_mmr	325	pbb (WMO, 2014)

## Sheet: Best(OsloNitr)
# Best estimates of ECLIPSE T4.3 Radiative Forcing Simulations (Normalised RF in mWm-2 Tg[species]-1)														Best estimates are given for each main process.					Perturbation codes: EUS Europe Summer, EUW Europe Winter, CNS China Summer, CNW China Winter, RWS Rest of the World Summer, RWW Rest of the World Winter, SHS Shipping Summer, SHW Shipping Winter, WDS World Summer, WDW World Winter
#			Latitude band 28N-60N											Nitrate RF is directly taken from OsloCTM2 and added to NorESM, HadGEM3, and ECHAM6.											Note: Best/low/high estimates of total nRF are sums of component best/low/high estimates, not averages of modelled nRF.
# Model:			OsloCTM2							NorESM					HadGEM3					ECHAM6		Include in	Best							Low							High
Species	Units	Perturb	AD+IRF	BC_SNOW	BC_SEMID	Ozone	Methane	PM Ozone	Total nRF	AD+IRF	Ozone	Methane	PM Ozone	Total nRF	AD+IRF	Ozone	Methane	PM Ozone	Total nRF	AD+IRF	Total nRF		AD+IRF	BC_SNOW	BC_SEMID	Ozone	Methane	PM Ozone	Total nRF	AD+IRF	BC_SNOW	BC_SEMID	Ozone	Methane	PM Ozone	Total nRF	AD+IRF	BC_SNOW	BC_SEMID	Ozone	Methane	PM Ozone	Total nRF
SO2	SO2	EUS	-20.2697	0		0	0	0	-20.2697	-25.4266	0	0	0	-25.4266	-57.9648	0	0	0	-57.9648	-9.02593	-9.02593	O,N,H	-34.5537	0	0	0	0	0	-34.5537	-57.9648	0	0	0	0	0	-57.9648	-20.2697	0	0	0	0	0	-20.2697
SO2	SO2	EUW	-6.62379	0		0	0	0	-6.62379	-11.0125	0	0	0	-11.0125	-16.0952	0	0	0	-16.0952	-2.54904	-2.54904	O,N,H	-11.2438	0	0	0	0	0	-11.2438	-16.0952	0	0	0	0	0	-16.0952	-6.62379	0	0	0	0	0	-6.62379
SO2	SO2	CNS	-13.4124	0		0	0	0	-13.4124	-21.3707	0	0	0	-21.3707	-35.7061	0	0	0	-35.7061	-3.46908	-3.46908	O,N,H	-23.4964	0	0	0	0	0	-23.4964	-35.7061	0	0	0	0	0	-35.7061	-13.4124	0	0	0	0	0	-13.4124
SO2	SO2	CNW	-4.53503	0		0	0	0	-4.53503	-8.45346	0	0	0	-8.45346	-8.41305	0	0	0	-8.41305	-1.01508	-1.01508	O,N,H	-7.13385	0	0	0	0	0	-7.13385	-8.45346	0	0	0	0	0	-8.45346	-4.53503	0	0	0	0	0	-4.53503
SO2	SO2	RWS	-13.3429	0		0	0	0	-13.3429	-21.143	0	0	0	-21.143	-44.3332	0	0	0	-44.3332	-4.1515	-4.1515	O,N,H	-26.273	0	0	0	0	0	-26.273	-44.3332	0	0	0	0	0	-44.3332	-13.3429	0	0	0	0	0	-13.3429
SO2	SO2	RWW	-4.85056	0		0	0	0	-4.85056	-10.1394	0	0	0	-10.1394	-17.5352	0	0	0	-17.5352	-1.40421	-1.40421	O,N,H	-10.8417	0	0	0	0	0	-10.8417	-17.5352	0	0	0	0	0	-17.5352	-4.85056	0	0	0	0	0	-4.85056
SO2	SO2	SHS	-25.104	0		0	0	0	-25.104	0	0	0	0	0	0	0	0	0	0	0	0
SO2	SO2	SHW	-8.44546	0		0	0	0	-8.44546	0	0	0	0	0	0	0	0	0	0	0	0
SO2	SO2	WDS	-15.108	0		0	0	0	-15.108	-21.6496	0	0	0	-21.6496	-42.4618	0	0	0	-42.4618	-4.39106	-4.39106	O,N,H	-26.4065	0	0	0	0	0	-26.4065	-42.4618	0	0	0	0	0	-42.4618	-15.108	0	0	0	0	0	-15.108
SO2	SO2	WDW	-5.25059	0		0	0	0	-5.25059	-9.66561	0	0	0	-9.66561	-14.0125	0	0	0	-14.0125	-1.4194	-1.4194	O,N,H	-9.64291	0	0	0	0	0	-9.64291	-14.0125	0	0	0	0	0	-14.0125	-5.25059	0	0	0	0	0	-5.25059
NOX	NO2	EUS	-2.15167	0		1.55864	-0.859775	-0.283945	-1.73675	-1.43613	1.355	-0.88733	-0.375376	-1.34384	-2.8102	1.30039	-0.587128	-0.20547	-2.30241	0	0	O,N,H	-2.13267	0	0	1.40468	-0.778078	-0.288264	-1.79433	-2.8102	0	0	1.30039	-0.88733	-0.375376	-2.77252	-1.43613	0	0	1.55864	-0.587128	-0.20547	-0.670086
NOX	NO2	EUW	-1.66636	0		0.669938	-0.408163	-0.134798	-1.53938	-0.7559	0.296196	-0.302979	-0.0621146	-0.824797	-0.914002	0.274005	-0.21384	-0.0748348	-0.928671	0	0	O,N,H	-1.11209	0	0	0.41338	-0.308327	-0.0905825	-1.09762	-1.66636	0	0	0.274005	-0.408163	-0.134798	-1.93531	-0.7559	0	0	0.669938	-0.21384	-0.0621146	-0.361916
NOX	NO2	CNS	-1.25036	0		2.10612	-0.879881	-0.290585	-0.314704	-0.531423	2.21755	-0.881059	-0.372724	0.43234	-3.3158	2.20356	-0.622501	-0.217849	-1.95258	0	0	O,N,H	-1.69919	0	0	2.17574	-0.79448	-0.293719	-0.611649	-3.3158	0	0	2.10612	-0.881059	-0.372724	-2.46346	-0.531423	0	0	2.21755	-0.622501	-0.217849	0.845773
NOX	NO2	CNW	-2.6404	0		0.893859	-0.566219	-0.186997	-2.49976	-2.65589	0.510164	-0.455324	-0.0933473	-2.69439	-3.49979	0.597712	-0.309424	-0.108285	-3.31978	0	0	O,N,H	-2.93202	0	0	0.667245	-0.443656	-0.129543	-2.83798	-3.49979	0	0	0.510164	-0.566219	-0.186997	-3.74284	-2.6404	0	0	0.893859	-0.309424	-0.0933473	-2.14931
NOX	NO2	RWS	-0.747537	0		1.92245	-1.79487	-0.592766	-1.21272	-0.547332	2.21732	-2.0976	-0.887367	-1.31498	-1.73241	1.62326	-1.57506	-0.551205	-2.23542	0	0	O,N,H	-1.00909	0	0	1.92101	-1.82251	-0.677113	-1.5877	-1.73241	0	0	1.62326	-2.0976	-0.887367	-3.09411	-0.547332	0	0	2.21732	-1.57506	-0.551205	-0.456279
NOX	NO2	RWW	-0.799567	0		1.01859	-1.84848	-0.610469	-2.23993	-0.375946	0.835979	-2.17594	-0.446096	-2.162	-1.12798	0.673642	-1.61566	-0.565412	-2.63541	0	0	O,N,H	-0.767832	0	0	0.842735	-1.88002	-0.540659	-2.34578	-1.12798	0	0	0.673642	-2.17594	-0.610469	-3.24075	-0.375946	0	0	1.01859	-1.61566	-0.446096	-1.41911
NOX	NO2	SHS	-1.52365	0		2.40007	-3.38053	-1.11644	-3.62054	0	0	0	0	0	0	0	0	0	0	0	0
NOX	NO2	SHW	-0.271172	0		1.90152	-4.17516	-1.37887	-3.92368	0	0	0	0	0	0	0	0	0	0	0	0
NOX	NO2	WDS	-1.08273	0		1.99716	-1.78791	-0.590467	-1.46395	-0.58119	2.12491	-1.70323	-0.720534	-0.880045	-2.10863	1.70719	-1.28903	-0.451107	-2.14158	0	0	O,N,H	-1.25752	0	0	1.94309	-1.59339	-0.587369	-1.49519	-2.10863	0	0	1.70719	-1.78791	-0.720534	-2.90989	-0.58119	0	0	2.12491	-1.28903	-0.451107	-0.196423
NOX	NO2	WDW	-1.14487	0		1.09516	-1.82373	-0.602296	-2.47574	-0.781294	0.703927	-1.58722	-0.325401	-1.98999	-1.48837	0.614326	-1.18329	-0.4141	-2.47142	0	0	O,N,H	-1.13818	0	0	0.80447	-1.53141	-0.447266	-2.31238	-1.48837	0	0	0.614326	-1.82373	-0.602296	-3.30007	-0.781294	0	0	1.09516	-1.18329	-0.325401	-1.19482
CO	CO	EUS	-0.00642361	0		0.0826728	0.123509	0.0407896	0.240548	0.0491135	0.050238	0.094844	0.0401228	0.234318	0.380846	0.0812243	0.0652449	0.022833	0.550148	0	0	O,N,H	0.141179	0	0	0.0713784	0.0945327	0.0345818	0.341672	-0.00642361	0	0	0.050238	0.0652449	0.022833	0.131892	0.380846	0	0	0.0826728	0.123509	0.0407896	0.627818
CO	CO	EUW	-0.0175529	0		0.0619657	0.149012	0.049212	0.242637	0.082981	0.041437	0.112342	0.0230316	0.259792	0.229923	0.0597144	0.0796914	0.0278886	0.397218	0	0	O,N,H	0.0984505	0	0	0.0543723	0.113682	0.0333774	0.299882	-0.0175529	0	0	0.041437	0.0796914	0.0230316	0.126607	0.229923	0	0	0.0619657	0.149012	0.049212	0.490113
CO	CO	CNS	-0.0111465	0		0.105788	0.122427	0.0404321	0.2575	0.0498773	0.0987987	0.0875882	0.0370533	0.273318	0.422999	0.13605	0.0573546	0.0200717	0.636475	0	0	O,N,H	0.15391	0	0	0.113545	0.0891232	0.032519	0.389098	-0.0111465	0	0	0.0987987	0.0573546	0.0200717	0.165079	0.422999	0	0	0.13605	0.122427	0.0404321	0.721908
CO	CO	CNW	-0.0105791	0		0.0603799	0.147725	0.048787	0.246313	0.0736649	0.0451525	0.110868	0.0227293	0.252415	0.32556	0.0767268	0.0749445	0.0262274	0.503459	0	0	O,N,H	0.129549	0	0	0.0607531	0.111179	0.0325813	0.334062	-0.0105791	0	0	0.0451525	0.0749445	0.0227293	0.132247	0.32556	0	0	0.0767268	0.147725	0.048787	0.598799
CO	CO	RWS	-0.00870482	0		0.0887756	0.12957	0.0427911	0.252432	0.0191903	0.0758192	0.0935277	0.0395659	0.228103	0.107959	0.0473616	0.0636367	0.0222702	0.241227	0	0	O,N,H	0.0394813	0	0	0.0706521	0.0955781	0.0348757	0.240587	-0.00870482	0	0	0.0473616	0.0636367	0.0222702	0.124564	0.107959	0	0	0.0887756	0.12957	0.0427911	0.369095
CO	CO	RWW	-0.00830881	0		0.0509379	0.149568	0.0493957	0.241593	0.0381268	0.0393292	0.111343	0.0228268	0.211626	0.128538	0.0407051	0.077843	0.0272418	0.274328	0	0	O,N,H	0.0527852	0	0	0.0436574	0.112918	0.0331548	0.242516	-0.00830881	0	0	0.0393292	0.077843	0.0228268	0.13169	0.128538	0	0	0.0509379	0.149568	0.0493957	0.37844
CO	CO	SHS	0.00226795	0		0.0835477	0.0869565	0.0287178	0.20149	0	0	0	0	0	0	0	0	0	0	0	0
CO	CO	SHW	0.00522617	0		0.0425765	0.176991	0.0584522	0.283246	0	0	0	0	0	0	0	0	0	0	0	0
CO	CO	WDS	-0.00922175	0		0.0928352	0.127462	0.042095	0.253171	0.0286024	0.080483	0.0920603	0.0389452	0.240091	0.167429	0.0629277	0.062656	0.021927	0.314939	0	0	O,N,H	0.0622697	0	0	0.0787486	0.0940595	0.0343224	0.2694	-0.00922175	0	0	0.0629277	0.062656	0.021927	0.138289	0.167429	0	0	0.0928352	0.127462	0.042095	0.429821
CO	CO	WDW	-0.00952506	0		0.0544623	0.14897	0.049198	0.243105	0.051631	0.0412472	0.111253	0.0228082	0.226939	0.180772	0.0503176	0.0772184	0.0270232	0.335332	0	0	O,N,H	0.0742927	0	0	0.0486757	0.11248	0.0330098	0.268458	-0.00952506	0	0	0.0412472	0.0772184	0.0228082	0.131749	0.180772	0	0	0.0544623	0.14897	0.049198	0.433402
VOC	C	EUS	-1.67252	0		2.37524	0.64862	0.21421	1.56555	-2.9313	0.858551	0.392273	0.165947	-1.51453	2.6178	1.28937	0.442595	0.15489	4.50466	0	0	O,N,H	-0.662008	0	0	1.50772	0.494496	0.178349	1.51856	-2.9313	0	0	0.858551	0.392273	0.15489	-1.52559	2.6178	0	0	2.37524	0.64862	0.21421	5.85587
VOC	C	EUW	-1.68954	0		2.58472	0.168278	0.0555746	1.11903	-5.48641	0.887562	0.286306	0.0586964	-4.25384	10.8454	1.17833	0.349882	0.122444	12.4961	0	0	O,N,H	1.22316	0	0	1.5502	0.268155	0.078905	3.12043	-5.48641	0	0	0.887562	0.168278	0.0555746	-4.37499	10.8454	0	0	2.58472	0.349882	0.122444	13.9025
VOC	C	CNS	-1.35378	0		2.92001	0.29883	0.0986902	1.96375	-4.16723	1.71404	0.204688	0.0865913	-2.16191	4.3037	2.08027	0.321495	0.11251	6.81798	0	0	O,N,H	-0.40577	0	0	2.23811	0.275005	0.0992638	2.20661	-4.16723	0	0	1.71404	0.204688	0.0865913	-2.16191	4.3037	0	0	2.92001	0.321495	0.11251	7.65771
VOC	C	CNW	-1.34439	0		2.10089	0.0158441	0.0052326	0.777578	-2.09574	0.790338	0.290826	0.0596231	-0.954953	1.64582	1.30843	0.469017	0.164136	3.58741	0	0	O,N,H	-0.598103	0	0	1.39989	0.258563	0.0763307	1.13668	-2.09574	0	0	0.790338	0.0158441	0.0052326	-1.28433	1.64582	0	0	2.10089	0.469017	0.164136	4.37987
VOC	C	RWS	-1.09981	0		1.79828	0.775393	0.256077	1.72994	-1.27646	0.625648	0.329284	0.1393	-0.182227	0.601256	0.61732	0.373946	0.130865	1.72339	0	0	O,N,H	-0.591673	0	0	1.01375	0.492874	0.175414	1.09037	-1.27646	0	0	0.61732	0.329284	0.130865	-0.198991	0.601256	0	0	1.79828	0.775393	0.256077	3.43101
VOC	C	RWW	-0.791353	0		1.33147	0.742584	0.245242	1.52795	-1.27474	0.3365	0.417495	0.0855919	-0.435156	1.21662	0.638954	0.54689	0.191389	2.59385	0	0	O,N,H	-0.28316	0	0	0.768976	0.56899	0.174074	1.22888	-1.27474	0	0	0.3365	0.417495	0.0855919	-0.435156	1.21662	0	0	1.33147	0.742584	0.245242	3.53592
VOC	C	SHS	-0.20991	0		1.12083	1.23252	0.407045	2.55048	0	0	0	0	0	0	0	0	0	0	0	0
VOC	C	SHW	-0.177343	0		0.909351	0.975682	0.322224	2.02991	0	0	0	0	0	0	0	0	0	0	0	0
VOC	C	WDS	-1.18502	0		2.03699	0.682322	0.22534	1.75963	-1.6918	0.761438	0.318875	0.134897	-0.476588	1.00694	0.769454	0.371666	0.130068	2.27813	0	0	O,N,H	-0.623292	0	0	1.18929	0.457621	0.163435	1.18706	-1.6918	0	0	0.761438	0.318875	0.130068	-0.481417	1.00694	0	0	2.03699	0.682322	0.22534	3.9516
VOC	C	WDW	-0.977413	0		1.59062	0.545727	0.180229	1.33916	-1.68408	0.444856	0.388778	0.0797044	-0.770742	1.77248	0.762721	0.525662	0.18396	3.24482	0	0	O,N,H	-0.296339	0	0	0.932731	0.486722	0.147964	1.27108	-1.68408	0	0	0.444856	0.388778	0.0797044	-0.770742	1.77248	0	0	1.59062	0.545727	0.18396	4.09278
BC	C	EUS	188.416	1.09592	-88.5481	0	0	0	100.964	193.721	0	0	0	193.721	289.448	0	0	0	289.448	83.6602	83.6602	O,N,H	223.862	1.09592	-88.5481	0	0	0	136.409	188.416	1.09592	-88.5481	0	0	0	100.964	289.448	1.09592	-88.5481	0	0	0	201.995
BC	C	EUW	115.18	16.1626	-10.8904	0	0	0	120.453	93.2889	0	0	0	93.2889	60.6227	0	0	0	60.6227	28.0361	28.0361	O,N,H	89.6974	16.1626	-10.8904	0	0	0	94.9695	60.6227	16.1626	-10.8904	0	0	0	65.8948	115.18	16.1626	-10.8904	0	0	0	120.453
BC	C	CNS	195.824	1.20906	-114.948	0	0	0	82.0842	305.295	0	0	0	305.295	345.736	0	0	0	345.736	39.6553	39.6553	O,N,H	282.285	1.20906	-114.948	0	0	0	168.546	195.824	1.20906	-114.948	0	0	0	82.0842	345.736	1.20906	-114.948	0	0	0	231.996
BC	C	CNW	92.9641	10.7746	3.64783	0	0	0	107.387	104.886	0	0	0	104.886	69.9954	0	0	0	69.9954	27.7323	27.7323	O,N,H	89.2818	10.7746	3.64783	0	0	0	103.704	69.9954	10.7746	3.64783	0	0	0	84.4179	104.886	10.7746	3.64783	0	0	0	119.308
BC	C	RWS	110.822	2.0118	-59.3988	0	0	0	53.4347	160.848	0	0	0	160.848	246.602	0	0	0	246.602	24.3356	24.3356	O,N,H	172.757	2.0118	-59.3988	0	0	0	115.37	110.822	2.0118	-59.3988	0	0	0	53.4347	246.602	2.0118	-59.3988	0	0	0	189.215
BC	C	RWW	72.5626	10.2218	-26.7832	0	0	0	56.0011	110.202	0	0	0	110.202	81.9751	0	0	0	81.9751	14.8909	14.8909	O,N,H	88.2466	10.2218	-26.7832	0	0	0	71.6851	72.5626	10.2218	-26.7832	0	0	0	56.0011	110.202	10.2218	-26.7832	0	0	0	93.6406
BC	C	SHS	80.8739	0.445085	-37.4177	0	0	0	43.9013	0	0	0	0	0	0	0	0	0	0	0	0				-37.4177							-37.4177							-37.4177
BC	C	SHW	62.9615	4.38341	-15.4228	0	0	0	51.9221	0	0	0	0	0	0	0	0	0	0	0	0				-15.4228							-15.4228							-15.4228
BC	C	WDS	133.324	1.74425	-72.3723	0	0	0	62.6961	195.523	0	0	0	195.523	273.594	0	0	0	273.594	31.5568	31.5568	O,N,H	200.814	1.74425	-72.3723	0	0	0	130.186	133.324	1.74425	-72.3723	0	0	0	62.6961	273.594	1.74425	-72.3723	0	0	0	202.966
BC	C	WDW	81.8044	10.7378	-24.532	0	0	0	68.0102	107.2	0	0	0	107.2	76.2001	0	0	0	76.2001	19.8796	19.8796	O,N,H	88.4016	10.7378	-24.532	0	0	0	74.6074	76.2001	10.7378	-24.532	0	0	0	62.4059	107.2	10.7378	-24.532	0	0	0	93.4062
OC	C	EUS	-39.3093	0		0	0	0	-39.3093	-112.174	0	0	0	-112.174	-69.3045	0	0	0	-69.3045	-8.76617	-8.76617	O,N,H	-73.596	0	0	0	0	0	-73.596	-112.174	0	0	0	0	0	-112.174	-39.3093	0	0	0	0	0	-39.3093
OC	C	EUW	-15.2127	0		0	0	0	-15.2127	-88.5044	0	0	0	-88.5044	-27.7426	0	0	0	-27.7426	-2.98607	-2.98607	O,N,H	-43.8199	0	0	0	0	0	-43.8199	-88.5044	0	0	0	0	0	-88.5044	-15.2127	0	0	0	0	0	-15.2127
OC	C	CNS	-18.7392	0		0	0	0	-18.7392	-85.5452	0	0	0	-85.5452	-25.444	0	0	0	-25.444	-3.02705	-3.02705	O,N,H	-43.2428	0	0	0	0	0	-43.2428	-85.5452	0	0	0	0	0	-85.5452	-18.7392	0	0	0	0	0	-18.7392
OC	C	CNW	-11.5112	0		0	0	0	-11.5112	-32.6181	0	0	0	-32.6181	-2.82969	0	0	0	-2.82969	-2.71688	-2.71688	O,N,H	-15.653	0	0	0	0	0	-15.653	-32.6181	0	0	0	0	0	-32.6181	-2.82969	0	0	0	0	0	-2.82969
OC	C	RWS	-6.6884	0		0	0	0	-6.6884	-33.2804	0	0	0	-33.2804	-22.7364	0	0	0	-22.7364	-0.861819	-0.861819	O,N,H	-20.9017	0	0	0	0	0	-20.9017	-33.2804	0	0	0	0	0	-33.2804	-6.6884	0	0	0	0	0	-6.6884
OC	C	RWW	-3.92516	0		0	0	0	-3.92516	-27.5269	0	0	0	-27.5269	-12.9743	0	0	0	-12.9743	-0.547315	-0.547315	O,N,H	-14.8088	0	0	0	0	0	-14.8088	-27.5269	0	0	0	0	0	-27.5269	-3.92516	0	0	0	0	0	-3.92516
OC	C	SHS	-11.4262	0		0	0	0	-11.4262	0	0	0	0	0	0	0	0	0	0	0	0
OC	C	SHW	-5.68139	0		0	0	0	-5.68139	0	0	0	0	0	0	0	0	0	0	0	0
OC	C	WDS	-10.2608	0		0	0	0	-10.2608	-47.0164	0	0	0	-47.0164	-25.1624	0	0	0	-25.1624	-1.58491	-1.58491	O,N,H	-27.4799	0	0	0	0	0	-27.4799	-47.0164	0	0	0	0	0	-47.0164	-10.2608	0	0	0	0	0	-10.2608
OC	C	WDW	-6.73341	0		0	0	0	-6.73341	-32.2042	0	0	0	-32.2042	-10.7176	0	0	0	-10.7176	-1.31344	-1.31344	O,N,H	-16.5517	0	0	0	0	0	-16.5517	-32.2042	0	0	0	0	0	-32.2042	-6.73341	0	0	0	0	0	-6.73341
NH3	NH3	EUS	-7.24795	0		0	0	0	-7.24795	0	0	0	0	0	0	0	0	0	0	0	0	O	-7.24795	0	0	0	0	0	-7.24795	-7.24795	0	0	0	0	0	-7.24795	-7.24795	0	0	0	0	0	-7.24795
NH3	NH3	EUW	-4.67295	0		0	0	0	-4.67295	0	0	0	0	0	0	0	0	0	0	0	0	O	-4.67295	0	0	0	0	0	-4.67295	-4.67295	0	0	0	0	0	-4.67295	-4.67295	0	0	0	0	0	-4.67295
NH3	NH3	CNS	-3.36407	0		0	0	0	-3.36407	0	0	0	0	0	0	0	0	0	0	0	0	O	-3.36407	0	0	0	0	0	-3.36407	-3.36407	0	0	0	0	0	-3.36407	-3.36407	0	0	0	0	0	-3.36407
NH3	NH3	CNW	-5.05645	0		0	0	0	-5.05645	0	0	0	0	0	0	0	0	0	0	0	0	O	-5.05645	0	0	0	0	0	-5.05645	-5.05645	0	0	0	0	0	-5.05645	-5.05645	0	0	0	0	0	-5.05645
NH3	NH3	RWS	-1.52101	0		0	0	0	-1.52101	0	0	0	0	0	0	0	0	0	0	0	0	O	-1.52101	0	0	0	0	0	-1.52101	-1.52101	0	0	0	0	0	-1.52101	-1.52101	0	0	0	0	0	-1.52101
NH3	NH3	RWW	-1.97881	0		0	0	0	-1.97881	0	0	0	0	0	0	0	0	0	0	0	0	O	-1.97881	0	0	0	0	0	-1.97881	-1.97881	0	0	0	0	0	-1.97881	-1.97881	0	0	0	0	0	-1.97881
NH3	NH3	WDS	-2.42621	0		0	0	0	-2.42621	0	0	0	0	0	0	0	0	0	0	0	0	O	-2.42621	0	0	0	0	0	-2.42621	-2.42621	0	0	0	0	0	-2.42621	-2.42621	0	0	0	0	0	-2.42621
NH3	NH3	WDW	-2.9849	0		0	0	0	-2.9849	0	0	0	0	0	0	0	0	0	0	0	0	O	-2.9849	0	0	0	0	0	-2.9849	-2.9849	0	0	0	0	0	-2.9849	-2.9849	0	0	0	0	0	-2.9849
Ship_All	Multiple	SHS	-9.50085	0.00534102	-0.151897	1.40715	-1.89106	-0.624531	-10.7558	-13.1185	0.975316	-1.73114	-0.73234	-14.6067	-6.04697	1.23317	-1.43488	-0.502148	-6.75083	-3.54877	-3.54877	O,N,H	-9.55545	0.00534102	-0.151897	1.20521	-1.68569	-0.619673	-10.8022	-13.1185	0.00534102	-0.151897	0.975316	-1.89106	-0.73234	-14.9132	-6.04697	0.00534102	-0.151897	1.40715	-1.43488	-0.502148	-6.72341
Ship_All	Multiple	SHW	-2.91971	0.0526009	-0.0636486	1.11423	-2.34546	-0.7746	-4.93659	-6.39349	0.967123	-2.12469	-0.435589	-7.98664	-5.0283	0.922164	-1.7915	-0.626949	-6.52458	-1.40913	-1.40913	O,N,H	-4.7805	0.0526009	-0.0636486	1.00117	-2.08722	-0.612379	-6.48997	-6.39349	0.0526009	-0.0636486	0.922164	-2.34546	-0.7746	-8.60243	-2.91971	0.0526009	-0.0636486	1.11423	-1.7915	-0.435589	-4.04362
CH4	CH4	Summer	-0.0253333	0		0.672823	2.03728	0	2.68477	0.249718	0.583536	1.37939	0	2.21264	0.461012	0.421914	1.20561	0	2.08854	0	0	O,N,H	0.187793	0	0	0.490792	1.50298	0	2.18157	-0.0253333	0	0	0.284895	1.20561	0	1.46517	0.461012	0	0	0.672823	2.03728	0	3.17112
CH4	CH4	Winter	0	0		0	0	0	0	0.0657753	0.284895	1.38964	0	1.74031	0	0	0	0	0	0	0			0	0						0	0						0	0
