# Supplementary material for: Regional and seasonal radiative forcing by perturbations to aerosol and ozone precursor emissions
Source: Copernicus journal article supplement (doi:10.5194/acp-2016-310), 2016-04-27
Supplement: Supplementary file 5 [file eclipse_t4-3_results_oslonitr_28S-28N_final.xlsx]

## Sheet: OsloCTM2
ECLIPSE T4.3 Radiative Forcing Simulations (Absolute RF in mWm-2, Normalised RF in mWm-2 Tg[species]-1)											Perturbation codes: EUS Europe Summer, EUW Europe Winter, CNS China Summer, CNW China Winter, RWS Rest of the World Summer, RWW Rest of the World Winter, SHS Shipping Summer, SHW Shipping Winter, WDS World Summer, WDW World Winter
Model:		OsloCTM2
		Latitude band 28S-28N
	Perturb	ADRF SU	ADRF NI	ADRF SOA	ADRF BC	ADRF OC	AIRF	BC_SNOW	SW O3	LW O3	CH4	PM O3	Total RF	DeltaEmi	nADRF SU	nADRF NI	nADRF SOA	nADRF BC	nADRF OC	nAIRF	nBC_SNOW	nSW O3	nLW O3	nCH4	nPM O3	Total nRF	Total SLnRF	Total LLnRF					ADRF NI/ADRF TOT			ADRF NI/AD+IRF TOT
SO2	EUS	-2.05854	0.0313068				-0.959949						-2.98718	0.768	-2.68039	0.0407641	0	0	0	-1.24993		0	0	0	0	-3.88956	-3.88956	0					-0.0152083			-0.0103717
	EUW	-0.649099	0.0349494				-0.342372						-0.956522	0.83	-0.782047	0.0421077	0	0	0	-0.412496		0	0	0	0	-1.15244	-1.15244	0					-0.0538429			-0.03525
	CNS	-6.33248	0.0654699				-3.69964						-9.96665	3.149	-2.01095	0.0207907	0	0	0	-1.17486		0	0	0	0	-3.16502	-3.16502	0					-0.0103387			-0.00652603
	CNW	-4.16128	0.221257				-4.48501						-8.42503	3.317	-1.25453	0.0667039	0	0	0	-1.35213		0	0	0	0	-2.53996	-2.53996	0					-0.0531704			-0.0255898
	RWS	-21.2126	0.784588				-20.6619						-41.0899	5.156	-4.11416	0.15217	0	0	0	-4.00735		0	0	0	0	-7.96934	-7.96934	0					-0.0369869			-0.0187367
	RWW	-21.289	1.13122				-21.2262						-41.384	5.15	-4.13379	0.219654	0	0	0	-4.12159		0	0	0	0	-8.03572	-8.03572	0					-0.0531364			-0.0266074
	SHS	-3.03298	0.0212811				-6.67152						-9.68322	1.048	-2.89406	0.0203064	0	0	0	-6.36595		0	0	0	0	-9.23971	-9.23971	0					-0.00701656			-0.00219291
	SHW	-2.90231	0.0440162				-6.49888						-9.35717	1.031	-2.81504	0.0426927	0	0	0	-6.30347		0	0	0	0	-9.07582	-9.07582	0					-0.0151659			-0.00468198
	WDS	-32.6366	0.902646				-31.993						-63.727	10.121	-3.22464	0.0891854	0	0	0	-3.16105		0	0	0	0	-6.29651	-6.29651	0					-0.0276575			-0.0139664
	WDW	-29.0017	1.43144				-32.5525						-60.1227	10.328	-2.80806	0.138598	0	0	0	-3.15187		0	0	0	0	-5.82133	-5.82133	0					-0.0493572			-0.023255
NOX	EUS	-0.998393	-0.00456966				0.00173476		0.0526186	0.12297	-0.84	-0.386016	-2.05166	0.977	-1.0219	-0.00467724	0	0	0	0.0017756		0.0538573	0.125865	-0.859775	-0.395104	-2.09995	-0.845076	-1.25488					0.00457702			0.00458498
[NO2]	EUW	-0.0218586	-0.0219598				0.0135618		0.0123167	0.0190823	-0.42	-0.193008	-0.611866	1.029	-0.0212426	-0.0213409	0	0	0	0.0131796		0.0119696	0.0185445	-0.408163	-0.187569	-0.594622	0.0011102	-0.595732					1.00463			2.64678
	CNS	-0.0687948	-0.0248905				0.0437331		0.343702	1.22562	-1.78	-0.817987	-1.07862	2.023	-0.0340063	-0.0123038	0	0	0	0.0216179		0.169897	0.605843	-0.879881	-0.404343	-0.533177	0.751048	-1.28422					0.361808			0.993169
	CNW	-0.0827695	-0.606212				-0.155658		0.109594	0.289119	-1.18	-0.542261	-2.16819	2.084	-0.0397167	-0.290889	0	0	0	-0.0746919		0.0525883	0.138733	-0.566219	-0.260202	-1.0404	-0.213976	-0.826421					7.3241			2.54254
	RWS	-0.684133	-0.644162				0.132743		2.24915	7.10069	-11.41	-5.24339	-8.4991	6.357	-0.107619	-0.101331	0	0	0	0.0208814		0.353807	1.11699	-1.79487	-0.824821	-1.33697	1.28273	-2.61969					0.941574			1.16825
	RWW	-1.05774	-1.72137				0.296311		1.65046	5.48088	-11.76	-5.40423	-12.5157	6.362	-0.166259	-0.270571	0	0	0	0.0465751		0.259425	0.861503	-1.84848	-0.849454	-1.96726	0.730673	-2.69793					1.6274			2.26071
	SHS	0.352447	-0.0272777				-0.121021		0.879443	2.79347	-5.73	-2.63318	-4.48612	1.695	0.207933	-0.016093	0	0	0	-0.0713988		0.518845	1.64806	-3.38053	-1.5535	-2.64668	2.28735	-4.93403					-0.0773952			-0.117868
	SHW	0.345883	-0.0770535				0.158267		0.740854	2.49818	-6.96	-3.19842	-6.49229	1.667	0.207488	-0.0462229	0	0	0	0.0949412		0.444424	1.49861	-4.17516	-1.91867	-3.89459	2.19924	-6.09383					-0.222773			-0.152838
	WDS	-1.39887	-0.7009				0.0571899		3.52491	11.2428	-19.76	-9.08057	-16.1155	11.052	-0.126572	-0.0634184	0	0	0	0.00517462		0.318939	1.01726	-1.78791	-0.821623	-1.45815	1.15138	-2.60953					0.501046			0.522403
	WDW	-0.816485	-2.4266				0.312482		2.51322	8.28726	-20.32	-9.33792	-21.788	11.142	-0.0732799	-0.217788	0	0	0	0.0280454		0.225563	0.743786	-1.82373	-0.838083	-1.95549	0.706326	-2.66181					2.972			4.81464
CO	EUS	0.0135237	-1.29343e-06	0.000446405			-0.0175392		0.0141817	0.0732766	0.29	0.133268	0.507155	2.348	0.00575967	-5.50865e-07	0.000190121	0	0	-0.00746985		0.00603991	0.0312081	0.123509	0.0567579	0.215995	0.0357274	0.180267					-9.25856e-05			0.000362397
	EUW	0.00897393	0.000598327	-0.000992996			-0.0433329		0.0131018	0.0889362	0.46	0.21139	0.738674	3.087	0.00290701	0.000193822	-0.00032167	0	0	-0.0140372		0.00424419	0.0288099	0.149012	0.0684774	0.239285	0.021796	0.217489					0.0749695			-0.0169249
	CNS	0.0623056	-0.000924775	0.00465036			-0.0986753		0.121011	0.760089	1.57	0.721483	3.13994	12.824	0.00485852	-7.21128e-05	0.000362629	0	0	-0.00769458		0.00943629	0.0592708	0.122427	0.0562603	0.244849	0.0661616	0.178687					-0.0138117			0.0291549
	CNW	0.0536426	-0.00167617	0.00519634			-0.222129		0.127019	0.770543	2.51	1.15345	4.39605	16.991	0.00315712	-9.86505e-05	0.000305829	0	0	-0.0130733		0.00747566	0.0453501	0.147725	0.0678861	0.258728	0.0431167	0.215611					-0.0284874			0.010265
	RWS	0.0245052	0.00265541	0.0270854			-0.69966		0.450069	2.77298	4.54	2.08633	9.20396	35.039	0.000699369	7.57844e-05	0.000773007	0	0	-0.019968		0.0128448	0.0791398	0.12957	0.059543	0.262678	0.0735647	0.189113					0.0514708			-0.00409742
	RWW	0.0678995	0.00364945	0.0277008			-0.721163		0.374218	2.36721	5.25	2.4126	9.78212	35.101	0.0019344	0.00010397	0.000789174	0	0	-0.0205454		0.0106612	0.06744	0.149568	0.0687331	0.278685	0.0603833	0.218302					0.038174			-0.00583387
	SHS	0.000527666	-0.000501959	-0.000619196					0.00313874	0.0159621	0.01	0.00459543	0.0331028	0.115	0.0045884	-0.00436486	-0.00538431	0	0	0		0.0272934	0.138801	0.0869565	0.0399603	0.28785	0.160933	0.126917					5.48409			5.48409
	SHW	0.00115542	-0.000270821	4.42257e-05					-0.00239817	-0.0036102	0.02	0.00919086	0.0241113	0.113	0.010225	-0.00239665	0.000391378	0	0	0		-0.0212227	-0.0319487	0.176991	0.0813351	0.213374	-0.0449517	0.258326					-0.225751			-0.225751
	WDS	0.100335	0.00172934	0.0321822			-0.815874		0.585262	3.60635	6.4	2.94108	12.8511	50.211	0.00199826	3.44415e-05	0.000640939	0	0	-0.0162489		0.011656	0.0718238	0.127462	0.0585743	0.255941	0.0699046	0.186036					0.01305			-0.00253065
	WDW	0.130516	0.00257161	0.0319041			-0.986625		0.514339	3.22669	8.22	3.77744	14.9168	55.179	0.00236532	4.66048e-05	0.000578194	0	0	-0.0178804		0.00932128	0.0584768	0.14897	0.068458	0.270335	0.0529077	0.217428					0.0158331			-0.00312011
VOC	EUS	-0.00321686	-0.00110779	-0.0790278			-0.0163964		0.0204597	0.0710523	0.13	0.0597406	0.181504	0.200426	-0.0160502	-0.00552719	-0.3943	0	0	-0.0818079		0.102081	0.354507	0.64862	0.298069	0.905592	-0.0410968	0.946689					0.0134694			0.0112305
[C]	EUW	6.90777e-06	-0.00626596	-0.0777511			-0.0257632		0.033678	0.115248	0.04	0.0183817	0.0975344	0.237702	2.90606e-05	-0.0263606	-0.327095	0	0	-0.108384		0.141682	0.484842	0.168278	0.0773309	0.410322	0.164713	0.245609					0.0805971			0.0605364
VOC->C:	CNS	0.020902	-0.00240111	-0.187222			-0.0154307		0.117051	0.616938	0.15	0.0689315	0.768769	0.501957	0.041641	-0.00478349	-0.372984	0	0	-0.0307411		0.233189	1.22906	0.29883	0.137325	1.53154	1.09539	0.436155					0.0144367			0.013211
0.255319	CNW	0.0282264	0.0719093	-0.282337			0.0878998		0.129595	0.47634	0.01	0.00459543	0.526229	0.631149	0.0447222	0.113934	-0.447338	0	0	0.13927		0.205332	0.754719	0.0158441	0.00728106	0.833763	0.810638	0.0231252					-0.282984			-0.432639
	RWS	-0.036518	0.0229038	-1.86856			-0.594586		0.593609	3.111	1.66	0.762842	3.65069	2.14085	-0.0170577	0.0106985	-0.872812	0	0	-0.277733		0.277277	1.45316	0.775393	0.356326	1.70525	0.573533	1.13172					-0.0120225			-0.00916275
	RWW	0.0885282	0.0720053	-1.8232			-0.511573		0.529738	2.69355	1.6	0.735269	3.38432	2.15464	0.0410873	0.0334187	-0.846175	0	0	-0.237429		0.245859	1.25012	0.742584	0.341249	1.57071	0.486879	1.08383					-0.0415095			-0.0320559
	SHS	0.00532844	9.17589e-05	-0.00527671					0.0169702	0.0899109	0.09	0.0413589	0.238383	0.0730213	0.0729711	0.0012566	-0.0722626	0	0	0		0.232401	1.2313	1.23252	0.566395	3.26458	1.46566	1.79891					1.7738			1.7738
	SHW	0.00451937	-0.000960551	-0.00489163					0.0192607	0.0862408	0.07	0.032168	0.206337	0.0717447	0.0629924	-0.0133885	-0.0681811	0	0	0		0.268462	1.20205	0.975682	0.448368	2.87599	1.45194	1.42405					2.58032			2.58032
	WDS	-0.0188329	0.0193949	-2.13481			-0.626413		0.73112	3.79899	1.94	0.891514	4.60096	2.84323	-0.00662375	0.00682142	-0.750839	0	0	-0.220317		0.257144	1.33615	0.682322	0.313556	1.61821	0.622337	0.995878					-0.00900563			-0.00697644
	WDW	0.116762	0.137649	-2.18329			-0.449436		0.693011	3.28514	1.65	0.758246	4.00808	3.02349	0.0386181	0.0455264	-0.722109	0	0	-0.148648		0.229209	1.08654	0.545727	0.250785	1.32565	0.529135	0.796512					-0.0666087			-0.0547101
BC	EUS				1.27074		-0.0304353	1.35567e-08					1.2403	0.03	0	0	0	42.358	0	-1.01451	4.5189e-07	0	0	0	0	41.3435	41.3435	0					0			0
[C]	EUW				0.51826		-0.0176178	4.00557e-05					0.500682	0.047	0	0	0	11.0268	0	-0.374847	0.000852249	0	0	0	0	10.6528	10.6528	0					0			0
	CNS				4.2562		-0.105265	7.6255e-08					4.15094	0.11	0	0	0	38.6927	0	-0.956955	6.93227e-07	0	0	0	0	37.7358	37.7358	0					0			0
	CNW				1.98563		-0.161418	0.00432602					1.82854	0.177	0	0	0	11.2182	0	-0.911966	0.0244408	0	0	0	0	10.3307	10.3307	0					0			0
	RWS				33.8448		-1.70491	0.000415601					32.1403	0.351	0	0	0	96.4239	0	-4.85729	0.00118405	0	0	0	0	91.5678	91.5678	0					0			0
	RWW				27.4989		-1.82785	0.0121474					25.6832	0.359	0	0	0	76.5986	0	-5.0915	0.0338368	0	0	0	0	71.5409	71.5409	0					0			0
	SHS				0.566883		-0.0639213	7.80294e-08					0.502962	0.012	0	0	0	47.2403	0	-5.32677	6.50245e-06	0	0	0	0	41.9135	41.9135	0					0			0
	SHW				0.413882		-0.0609491	4.30323e-05					0.352976	0.012	0	0	0	34.4902	0	-5.07909	0.00358602	0	0	0	0	29.4147	29.4147	0					0			0
	WDS				39.9386		-1.90453	0.000415769					38.0345	0.503	0	0	0	79.4008	0	-3.78635	0.000826578	0	0	0	0	75.6153	75.6153	0					0			0
	WDW				30.4167		-2.06783	0.0165565					28.3654	0.595	0	0	0	51.1205	0	-3.47535	0.0278261	0	0	0	0	47.6729	47.6729	0					0			0
OC	EUS					-0.134289	-0.0460603						-0.180349	0.037	0	0	0	0	-3.62943	-1.24487		0	0	0	0	-4.87431	-4.87431	0					0			0
[C]	EUW					-0.0695022	-0.0225371						-0.0920393	0.067	0	0	0	0	-1.03735	-0.336375		0	0	0	0	-1.37372	-1.37372	0					0			0
	CNS					-0.343815	-0.143194						-0.487009	0.212	0	0	0	0	-1.62177	-0.675443		0	0	0	0	-2.29721	-2.29721	0					0			0
	CNW					-0.678235	-0.310187						-0.988422	0.366	0	0	0	0	-1.8531	-0.847505		0	0	0	0	-2.70061	-2.70061	0					0			0
	RWS					-7.13924	-5.55462						-12.6939	0.804	0	0	0	0	-8.87965	-6.90873		0	0	0	0	-15.7884	-15.7884	0					0			0
	RWW					-9.54391	-6.01801						-15.5619	0.825	0	0	0	0	-11.5684	-7.29456		0	0	0	0	-18.8629	-18.8629	0					0			0
	SHS					-0.0596529							-0.0596529	0.013	0	0	0	0	-4.58868	0		0	0	0	0	-4.58868	-4.58868	0					0			0
	SHW					-0.0604923							-0.0604923	0.013	0	0	0	0	-4.65325	0		0	0	0	0	-4.65325	-4.65325	0					0			0
	WDS					-7.61734	-5.74387						-13.3612	1.053	0	0	0	0	-7.23394	-5.45477		0	0	0	0	-12.6887	-12.6887	0					0			0
	WDW					-10.2916	-6.35073						-16.6424	1.258	0	0	0	0	-8.18096	-5.04828		0	0	0	0	-13.2292	-13.2292	0					0			0
NH3	EUS	0.000761794	-0.0130346				0.000809734						-0.0114631	0.388	0.00196339	-0.0335943	0	0	0	0.00208694		0	0	0	0	-0.029544	-0.029544	0					-17.1104			-8.29422
	EUW	0.000647346	-0.0158714				-0.000305909						-0.01553	0.384	0.0016858	-0.0413318	0	0	0	-0.000796638		0	0	0	0	-0.0404426	-0.0404426	0					-24.5176			-46.4841
	CNS	0.00268037	-0.0492077				-0.0103553						-0.0568826	1.365	0.00196364	-0.0360496	0	0	0	-0.0075863		0	0	0	0	-0.0416723	-0.0416723	0					-18.3585			6.41149
	CNW	0.00350806	-0.514834				-0.0995224						-0.610848	1.351	0.00259664	-0.381076	0	0	0	-0.0736657		0	0	0	0	-0.452145	-0.452145	0					-146.757			5.36205
	RWS	0.0191198	-1.30081				-0.168557						-1.45025	3.481	0.00549262	-0.373689	0	0	0	-0.048422		0	0	0	0	-0.416618	-0.416618	0					-68.0347			8.70473
	RWW	0.0455873	-2.77233				-0.259871						-2.98661	3.426	0.0133063	-0.809203	0	0	0	-0.0758526		0	0	0	0	-0.871749	-0.871749	0					-60.8136			12.9377
	WDS	0.022562	-1.36305				-0.178103						-1.51859	5.234	0.00431065	-0.260423	0	0	0	-0.034028		0	0	0	0	-0.29014	-0.29014	0					-60.4137			8.76332
	WDW	0.0497427	-3.30304				-0.359699						-3.61299	5.161	0.00963819	-0.639999	0	0	0	-0.0696957		0	0	0	0	-0.700057	-0.700057	0					-66.4024			10.6564
All	SHS	-2.67468	-0.0064068	-0.00589591	0.566883	-0.0596529	-6.85646	7.80294e-08	0.899552	2.89934	-5.59	-2.56885	-13.3962	2.95602	-0.904823	-0.00216737	-0.00199454	0.191772	-0.0201801	-2.31949	2.63968e-08	0.304312	0.980826	-1.89106	-0.869021	-4.53182	-1.77175	-2.76008					0.0029479			0.000709517
	SHW	-2.55075	-0.0342687	-0.0048474	0.413882	-0.0604923	-6.40156	4.30323e-05	0.757717	2.58081	-6.82	-3.13408	-15.2536	2.90774	-0.877227	-0.0117853	-0.00166707	0.142338	-0.0208039	-2.20156	1.47992e-05	0.260586	0.887564	-2.34546	-1.07784	-5.24584	-1.82254	-3.4233					0.015561			0.00398298
CH4	Annual	-1.6724	0.022694	0.097901					9.28152	48.0671	124.795		180.592	61.2556	-0.027302	0.000370481	0.00159824	0	0	0		0.151521	0.784698	2.03728	0	2.94817	0.910886	2.03728					-0.0144135			-0.0144135
	Winter

## Sheet: NorESM
ECLIPSE T4.3 Radiative Forcing Simulations (Absolute RF in mWm-2, Normalised RF in mWm-2 Tg[species]-1)											Perturbation codes: EUS Europe Summer, EUW Europe Winter, CNS China Summer, CNW China Winter, RWS Rest of the World Summer, RWW Rest of the World Winter, SHS Shipping Summer, SHW Shipping Winter, WDS World Summer, WDW World Winter
Model:		NorESM
		Latitude band 28S-28N
	Perturb	ADRF	AIRF	SW O3	LW O3	CH4	PM O3	Total RF	DeltaEMI	nADRF	nAIRF	nSW O3	nLW O3	nCH4	nPM O3	Total nRF	Total SLnRF	Total LLnRF				ADRF NI (from TOT and CTM2 ratio)				nADRF NI
SO2	EUS	-1.26018	-2.6103					-3.87048	0.772418	-1.63147	-3.37939	0	0	0	0	-5.01086	-5.01086	0				0.0191651				0.0248119
	EUW	-0.319562	-0.354042					-0.673604	0.845032	-0.378166	-0.418969	0	0	0	0	-0.797134	-0.797134	0				0.0172062				0.0203615
	CNS	-9.94178	-7.26398					-17.2058	3.14062	-3.16555	-2.31291	0	0	0	0	-5.47846	-5.47846	0				0.102786				0.0327278
	CNW	-3.54987	-4.81983					-8.3697	3.35299	-1.05872	-1.43747	0	0	0	0	-2.49619	-2.49619	0				0.188748				0.0562925
	RWS	-22.4784	-33.958					-56.4364	5.09299	-4.4136	-6.6676	0	0	0	0	-11.0812	-11.0812	0				0.831406				0.163245
	RWW	-17.6162	-31.311					-48.9272	5.16615	-3.40993	-6.0608	0	0	0	0	-9.47072	-9.47072	0				0.936061				0.181191
	SHS							0	1.03896	0	0	0	0	0	0	0	0	0				0				0
	SHW							0	1.03896	0	0	0	0	0	0	0	0	0				0				0
	WDS	-33.6804	-43.8323					-77.5126	9.00603	-3.73976	-4.86699	0	0	0	0	-8.60675	-8.60675	0				0.931514				0.103432
	WDW	-21.4856	-36.4849					-57.9705	9.36417	-2.29445	-3.89622	0	0	0	0	-6.19067	-6.19067	0				1.06047				0.113248
NOX	EUS	-0.138881	-0.255947	0.0490578	0.0873864	-0.88366	-0.349496	-1.49154	0.995864	-0.139458	-0.25701	0.0492615	0.0877493	-0.88733	-0.350948	-1.49773	-0.259457	-1.23828				-0.00063566				-0.0006383
[NO2]	EUW	-0.00749018	-0.0312051	0.00567575	-0.00152019	-0.3214	-0.121357	-0.477296	1.0608	-0.00706088	-0.0294166	0.00535044	-0.00143306	-0.302979	-0.114401	-0.44994	-0.0325601	-0.41738				-0.00752486				-0.00709357
	CNS	0.143657	-0.186374	0.402905	1.41164	-1.77983	-0.703941	-0.711943	2.0201	0.0711137	-0.0922597	0.199448	0.698796	-0.881059	-0.348468	-0.352429	0.877098	-1.22953				0.0519762				0.0257295
	CNW	0.136255	-0.0928649	0.101447	0.287231	-0.96133	-0.362987	-0.892248	2.11131	0.0645358	-0.0439845	0.0480493	0.136044	-0.455324	-0.171925	-0.422604	0.204645	-0.627249				0.997945				0.472666
	RWS	0.256082	2.85569	3.12655	9.82595	-13.1557	-5.2032	-2.2946	6.27179	0.0408308	0.455323	0.49851	1.56669	-2.0976	-0.82962	-0.36586	2.56136	-2.92722				0.24112				0.0384452
	RWW	0.521186	4.38857	2.74471	9.14383	-13.868	-5.2364	-2.30613	6.37335	0.0817758	0.688581	0.430654	1.4347	-2.17594	-0.821608	-0.36184	2.63571	-2.99755				0.84818				0.133082
	SHS							0	1.09606	0	0	0	0	0	0	0	0	0				0				0
	SHW							0	1.09606	0	0	0	0	0	0	0	0	0				0				0
	WDS	0.260858	2.41337	3.57851	11.325	-15.8192	-6.25664	-4.49808	9.28775	0.0280862	0.259844	0.385294	1.21935	-1.70323	-0.673644	-0.484302	1.89257	-2.37687				0.130702				0.0140725
	WDW	0.649951	4.2645	2.85183	9.42954	-15.1508	-5.72074	-3.67568	9.54546	0.06809	0.446757	0.298763	0.987856	-1.58722	-0.599315	-0.385071	1.80147	-2.18654				1.93166				0.202364
CO	EUS	0.0203072	0.0654161	0.0160287	0.0435714	0.23461	0.0927906	0.472724	2.47364	0.00820943	0.0264453	0.0064798	0.0176143	0.094844	0.0375117	0.191104	0.0587488	0.132356				-1.88015e-06				-7.60075e-07
	EUW	0.0117797	0.0570358	0.0203225	0.065837	0.34922	0.131861	0.636056	3.10853	0.00378947	0.0183481	0.00653765	0.0211795	0.112342	0.0424191	0.204616	0.0498547	0.154762				0.000883119				0.000284095
	CNS	-0.0218073	0.289019	0.140496	0.554096	1.13046	0.447108	2.53937	12.9065	-0.00168963	0.0223932	0.0108856	0.0429314	0.0875882	0.034642	0.196751	0.0745207	0.12223				0.000301196				2.33367e-05
	CNW	0.0835977	0.344897	0.159238	0.638805	1.89796	0.716647	3.84114	17.1191	0.0048833	0.0201469	0.00930177	0.0373153	0.110868	0.0418624	0.224378	0.0716473	0.15273				-0.00238148				-0.000139113
	RWS	0.0480286	0.44001	0.498123	1.94873	3.24023	1.28154	7.45667	34.6446	0.00138632	0.0127007	0.0143781	0.0562491	0.0935277	0.0369911	0.215233	0.0847142	0.130519				0.00247207				7.13551e-05
	RWW	0.170889	0.576404	0.444256	1.78522	3.91534	1.47839	8.37049	35.1645	0.0048597	0.0163916	0.0126336	0.0507676	0.111343	0.042042	0.238038	0.0846526	0.153385				0.00652352				0.000185514
	SHS							0	0.114038	0	0	0	0	0	0	0	0	0				0				0
	SHW							0	0.114038	0	0	0	0	0	0	0	0	0				0				0
	WDS	0.0465285	0.794445	0.654648	2.5464	4.6053	1.82144	10.4688	50.0248	0.000930109	0.015881	0.0130865	0.0509027	0.0920603	0.0364108	0.209271	0.0808003	0.128471				0.000607197				1.21379e-05
	WDW	0.266266	0.978337	0.623816	2.48986	6.16252	2.32689	12.8477	55.3922	0.00480693	0.017662	0.0112618	0.0449497	0.111253	0.0420076	0.231941	0.0786805	0.15326				0.00421581				7.61084e-05
VOC	EUS	0.00142638	0.0101446	0.0186439	0.0575925	0.11037	0.0436524	0.24183	0.28136	0.00506959	0.0360556	0.0662635	0.204693	0.392273	0.155148	0.859503	0.312082	0.547421				1.92125e-05				6.82846e-05
[C]	EUW	-0.0233988	-0.0554776	0.0228409	0.0750706	0.10372	0.0391634	0.161919	0.36227	-0.0645894	-0.153139	0.0630494	0.207223	0.286306	0.108106	0.446955	0.052544	0.394411				-0.00188588				-0.00520572
	CNS	-0.30488	-0.401446	0.107676	0.431539	0.1131	0.0447322	-0.00927881	0.552548	-0.551771	-0.726536	0.194872	0.780998	0.204688	0.0809562	-0.0167928	-0.302437	0.285644				-0.00440146				-0.00796575
	CNW	-0.178743	-0.242947	0.0893326	0.331683	0.24497	0.0924977	0.336793	0.842324	-0.212202	-0.288425	0.106055	0.393771	0.290826	0.109813	0.399838	-0.000800642	0.400639				0.0505815				0.0600499
	RWS	-1.42669	-4.7886	0.353795	1.43613	1.34266	0.531036	-2.55167	4.07751	-0.349892	-1.17439	0.0867674	0.352208	0.329284	0.130235	-0.625791	-1.08531	0.45952				0.0171524				0.00420658
	RWW	-1.38802	-5.35053	0.262218	1.03717	1.73918	0.656693	-3.04329	4.16575	-0.333198	-1.28441	0.0629462	0.248976	0.417495	0.157641	-0.73055	-1.30569	0.575136				0.057616				0.0138309
	SHS							0	0.209536	0	0	0	0	0	0	0	0	0				0				0
	SHW							0	0.209536	0	0	0	0	0	0	0	0	0				0				0
	WDS	-1.73014	-5.1799	0.480115	1.92526	1.56613	0.61942	-2.31912	4.91142	-0.35227	-1.05467	0.0977548	0.391997	0.318875	0.126118	-0.472189	-0.917183	0.444994				0.015581				0.00317241
	WDW	-1.59016	-5.64895	0.374391	1.44392	2.08787	0.788354	-2.54458	5.37034	-0.296101	-1.05188	0.0697146	0.26887	0.388778	0.146798	-0.47382	-1.0094	0.535575				0.105919				0.0197229
BC	EUS	1.42769	0.161756					1.58945	0.031786	44.9157	5.08891	0	0	0	0	50.0046	50.0046	0				0				0
[C]	EUW	0.438527	0.0209389					0.459466	0.047604	9.21198	0.439856	0	0	0	0	9.65183	9.65183	0				0				0
	CNS	6.62136	1.19073					7.81209	0.108732	60.8961	10.9511	0	0	0	0	71.8472	71.8472	0				0				0
	CNW	3.30361	0.440639					3.74425	0.177482	18.6138	2.48273	0	0	0	0	21.0965	21.0965	0				0				0
	RWS	35.2451	8.31279					43.5579	0.342568	102.885	24.2661	0	0	0	0	127.151	127.151	0				0				0
	RWW	31.0314	7.284					38.3154	0.357486	86.8045	20.3756	0	0	0	0	107.18	107.18	0				0				0
	SHS							0	0.012164	0	0	0	0	0	0	0	0	0				0				0
	SHW							0	0.012196	0	0	0	0	0	0	0	0	0				0				0
	WDS	43.2942	9.66528					52.9594	0.483086	89.62	20.0074	0	0	0	0	109.627	109.627	0				0				0
	WDW	34.7735	7.74558					42.5191	0.582572	59.6897	13.2955	0	0	0	0	72.9852	72.9852	0				0				0
OC	EUS	-0.12532	-0.499976					-0.625296	0.03996	-3.13614	-12.5119	0	0	0	0	-15.648	-15.648	0				0				0
[C]	EUW	-0.0294772	-0.0859076					-0.115385	0.0655371	-0.449779	-1.31082	0	0	0	0	-1.7606	-1.7606	0				0				0
OC->C:	CNS	-1.04409	-2.56795					-3.61204	0.211923	-4.92675	-12.1174	0	0	0	0	-17.0441	-17.0441	0				0				0
1.4	CNW	-0.881113	-2.16804					-3.04915	0.367731	-2.39608	-5.89572	0	0	0	0	-8.29179	-8.29179	0				0				0
	RWS	-7.67139	-30.8025					-38.4739	0.783989	-9.78508	-39.2895	0	0	0	0	-49.0746	-49.0746	0				0				0
	RWW	-8.78911	-31.1161					-39.9052	0.821396	-10.7002	-37.882	0	0	0	0	-48.5822	-48.5822	0				0				0
	SHS							0	0.0127143	0	0	0	0	0	0	0	0	0				0				0
	SHW							0	0.0127471	0	0	0	0	0	0	0	0	0				0				0
	WDS	-8.8408	-33.8704					-42.7112	1.03587	-8.53465	-32.6975	0	0	0	0	-41.2322	-41.2322	0				0				0
	WDW	-9.6997	-33.37					-43.0697	1.25466	-7.73091	-26.5968	0	0	0	0	-34.3277	-34.3277	0				0				0
NH3	EUS							0	-999	0	0	0	0	0	0	0	0	0				0				0
	EUW							0	-999	0	0	0	0	0	0	0	0	0				0				0
	CNS							0	-999	0	0	0	0	0	0	0	0	0				0				0
	CNW							0	-999	0	0	0	0	0	0	0	0	0				0				0
	RWS							0	-999	0	0	0	0	0	0	0	0	0				0				0
	RWW							0	-999	0	0	0	0	0	0	0	0	0				0				0
	WDS							0	-999	0	0	0	0	0	0	0	0	0				0				0
	WDW							0	-999	0	0	0	0	0	0	0	0	0				0				0
All	SHS	-2.71033	-11.9098	0.835389	2.75756	-4.27817	-1.69206	-16.9974	2.47131	-1.09672	-4.81923	0.338035	1.11583	-1.73114	-0.684682	-6.8779	-4.46208	-2.41582				-0.00798979				-0.00323302
	SHW	-2.24869	-11.6618	0.769619	2.61476	-5.25084	-1.98265	-17.7596	2.47135	-0.909905	-4.71881	0.311417	1.05803	-2.12469	-0.802257	-7.18621	-4.25926	-2.92695				-0.034992				-0.0141591
CH4	Summer	0.694454	4.27971	4.50334	15.4227	50.3806		75.2808	36.5239	0.0190137	0.117176	0.123298	0.422263	1.37939	0	2.06114	0.68175	1.37939				-0.0100095				-0.000274053
	Winter	0.6017	2.9163	4.04704	14.4546	48.9996		71.0192	35.2606	0.0170644	0.0827071	0.114775	0.409937	1.38964	0	2.01413	0.624484	1.38964				0				0

## Sheet: HadGEM3
ECLIPSE T4.3 Radiative Forcing Simulations (Absolute RF in mWm-2, Normalised RF in mWm-2 Tg[species]-1)											Perturbation codes: EUS Europe Summer, EUW Europe Winter, CNS China Summer, CNW China Winter, RWS Rest of the World Summer, RWW Rest of the World Winter, SHS Shipping Summer, SHW Shipping Winter, WDS World Summer, WDW World Winter
Model:		HadGEM3									Note: Methane RF is Delta[CH4]_ppb * RF/ppb, increased by 15% to represent stratospheric water changes
		Latitude band 28S-28N									Note: Primary mode ozone RF is DeltaCH4(ppb) * [Ozone RF / DeltaCH4(ppb)]_in_CH4_perturb
	Perturb	ARF	SW+LW O3	CH4	PM O3	Total RF	DeltaEmi	nARF	nSW+LW O3	nCH4	nPM O3	Total nRF	Total SLnRF	Total LLnRF												ADRF NI (from TOT and CTM2 ratio)				nADRF NI
SO2	EUS	5.65332				5.65332	-0.771942	-7.3235	0	0	0	-7.3235	-7.3235	0												-0.0586344				0.075957
	EUW	1.6396				1.6396	-0.845543	-1.93911	0	0	0	-1.93911	-1.93911	0												-0.057796				0.0683537
	CNS	17.4841				17.4841	-3.14065	-5.56703	0	0	0	-5.56703	-5.56703	0												-0.114102				0.0363306
	CNW	6.32008				6.32008	-3.35314	-1.88482	0	0	0	-1.88482	-1.88482	0												-0.16173				0.0482323
	RWS	78.3215				78.3215	-4.61614	-16.9669	0	0	0	-16.9669	-16.9669	0												-1.46748				0.317903
	RWW	62.4863				62.4863	-4.68146	-13.3476	0	0	0	-13.3476	-13.3476	0				Cells below are used to compute columns E and F:								-1.6626				0.355146
	SHS					0	-999	0	0	0	0	0	0	0												0				0
	SHW					0	-999	0	0	0	0	0	0	0				Delta[CH4]_ppb		RF/ppb		OzoneRF/DeltaCH4_o3_perturb				0				0
	WDS	101.459				101.459	-8.52873	-11.8961	0	0	0	-11.8961	-11.8961	0												-1.41702				0.166147
	WDW	70.446				70.446	-8.88014	-7.93298	0	0	0	-7.93298	-7.93298	0												-1.63822				0.184482
NOX	EUS	-0.346067	-0.234709	0.584898	0.265155	0.269277	-0.996201	0.347387	0.235604	-0.587128	-0.266167	-0.270304	0.582991	-0.853295				1.40112		0.363		0.19164				-0.00158671				0.00159276
[NO2]	EUW	0.138065	-0.0687097	0.22707	0.102939	0.399364	-1.06187	-0.130021	0.0647063	-0.21384	-0.0969413	-0.376095	-0.0653143	-0.310781				0.543945		0.363		0.145589				0.365428				-0.344136
	CNS	1.67795	-1.98703	1.26346	0.572772	1.52715	-2.02965	-0.826719	0.979001	-0.622501	-0.282202	-0.75242	0.152282	-0.904703				3.02661		0.363		0.145589				1.66649				-0.821071
	CNW	0.35855	-0.435085	0.659654	0.299045	0.882165	-2.13188	-0.168185	0.204085	-0.309424	-0.140273	-0.413797	0.0359002	-0.449697				1.5802		0.363		0.145589				0.911629				-0.427617
	RWS	7.60373	-14.6807	11.3	5.12272	9.34579	-7.17435	-1.05985	2.04628	-1.57506	-0.714032	-1.30267	0.986427	-2.28909				27.0692		0.363		0.145589				8.88307				-1.23817
	RWW	8.1737	-11.52	10.8081	4.89969	12.3615	-6.68958	-1.22186	1.72208	-1.61566	-0.732437	-1.84787	0.500226	-2.34809				25.8907		0.363		0.145589				18.4784				-2.76226
	SHS					0	-999	0	0	0	0	0	0	0												0				0
	SHW					0	-999	0	0	0	0	0	0	0												0				0
	WDS	8.93561	-16.9024	13.1484	5.96065	11.1422	-10.2002	-0.876023	1.65707	-1.28903	-0.584366	-1.09235	0.781046	-1.8734												4.66799				-0.457637
	WDW	8.67032	-12.0238	11.6948	5.30168	13.643	-9.88333	-0.877267	1.21657	-1.18329	-0.536426	-1.3804	0.339307	-1.71971												41.7445				-4.22372
CO	EUS	-0.0730125	-0.0564923	-0.158684	-0.0719372	-0.360126	-2.43213	0.03002	0.0232275	0.0652449	0.0295779	0.14807	0.0532475	0.0948228				-0.380127		0.363		0.145589				-2.64595e-05				1.08792e-05
	EUW	-0.220916	-0.097329	-0.253568	-0.114952	-0.686765	-3.18188	0.0694294	0.0305885	0.0796914	0.036127	0.215836	0.100018	0.115818				-0.607422		0.363		0.145589				0.00373897				-0.00117508
	CNS	-0.948904	-0.721406	-0.751276	-0.340581	-2.76217	-13.0988	0.0724421	0.0550742	0.0573546	0.0260009	0.210872	0.127516	0.0833555				-1.79968		0.363		0.145589				-0.0276652				0.00211204
	CNW	-1.46522	-0.617453	-1.31732	-0.59719	-3.99718	-17.5773	0.0833587	0.0351279	0.0749445	0.0339751	0.227406	0.118487	0.10892				-3.15564		0.363		0.145589				-0.0150405				0.000855675
	RWS	-4.03979	-3.76529	-4.09761	-1.85759	-13.7603	-64.3906	0.0627388	0.0584758	0.0636367	0.0288488	0.2137	0.121215	0.0924855				-9.8158		0.363		0.145589				0.0165527				-0.000257067
	RWW	-4.30821	-2.79495	-4.00129	-1.81393	-12.9184	-51.4021	0.0838139	0.0543742	0.077843	0.0352891	0.25132	0.138188	0.113132				-9.58508		0.363		0.145589				0.0251335				-0.000488959
	SHS					0	-999	0	0	0	0	0	0	0												0				0
	SHW					0	-999	0	0	0	0	0	0	0												0				0
	WDS	-5.06171	-4.54319	-5.00757	-2.27011	-16.8826	-79.9215	0.0633335	0.0568456	0.062656	0.0284043	0.211239	0.120179	0.0910603												0.0128094				-0.000160275
	WDW	-5.99435	-3.50973	-5.57218	-2.52607	-17.6023	-72.1613	0.0830687	0.0486373	0.0772184	0.0350059	0.24393	0.131706	0.112224												0.018703				-0.000259183
VOC	EUS	-0.0767452	-0.0354439	-0.0249186	-0.0112965	-0.148404	-0.0563011	1.36312	0.629542	0.442595	0.200645	2.6359	1.99266	0.64324				-0.0596924		0.363		0.145589				-0.000861888				0.0153085
[C]	EUW	0.275188	-0.0603766	-0.0233898	-0.0106035	0.180818	-0.0668507	-4.11646	0.903156	0.349882	0.158614	-2.7048	-3.2133	0.508496				-0.0560303		0.363		0.145589				0.0166589				-0.249195
	CNS	0.0275592	-0.169	-0.0466776	-0.0211607	-0.209279	-0.145189	-0.189816	1.164	0.321495	0.145746	1.44142	0.974184	0.467241				-0.111816		0.363		0.145589				0.000364085				-0.00250766
	CNW	0.487258	-0.147993	-0.0886672	-0.0401961	0.210402	-0.189049	-2.57742	0.782829	0.469017	0.212623	-1.11295	-1.79459	0.68164				-0.212402		0.363		0.145589				-0.210807				1.11509
	RWS	-1.01395	-1.41595	-0.53975	-0.244688	-3.21434	-1.44339	0.702478	0.980989	0.373946	0.169523	2.22694	1.68347	0.54347				-1.29297		0.363		0.145589				0.00929057				-0.00643663
	RWW	-0.976186	-0.966785	-0.578632	-0.262315	-2.78392	-1.05804	0.922636	0.913751	0.54689	0.247925	2.6312	1.83639	0.794815				-1.38611		0.363		0.145589				0.0312925				-0.0295759
	SHS					0	-999	0	0	0	0	0	0	0												0				0
	SHW					0	-999	0	0	0	0	0	0	0												0				0
	WDS	-1.06314	-1.62039	-0.611347	-0.277146	-3.57202	-1.64488	0.64633	0.985114	0.371666	0.16849	2.1716	1.63144	0.540156												0.00741691				-0.00450909
	WDW	-0.21374	-1.17515	-0.690689	-0.313114	-2.3927	-1.31394	0.162671	0.894375	0.525662	0.238302	1.82101	1.05705	0.763964												0.0116937				-0.00889975
BC	EUS	-1.98701				-1.98701	-0.031302	63.4787	0	0	0	63.4787	63.4787	0												0				0
[C]	EUW	-1.8236				-1.8236	-0.048614	37.5118	0	0	0	37.5118	37.5118	0												0				0
	CNS	-3.58436				-3.58436	-0.11036	32.4788	0	0	0	32.4788	32.4788	0												0				0
	CNW	3.26855				3.26855	-0.177213	-18.4442	0	0	0	-18.4442	-18.4442	0												0				0
	RWS	-67.5766				-67.5766	-0.31334	215.665	0	0	0	215.665	215.665	0												0				0
	RWW	-44.4517				-44.4517	-0.321528	138.251	0	0	0	138.251	138.251	0												0				0
	SHS					0	-999	0	0	0	0	0	0	0												0				0
	SHW					0	-999	0	0	0	0	0	0	0												0				0
	WDS	-73.148				-73.148	-0.455002	160.764	0	0	0	160.764	160.764	0												0				0
	WDW	-43.0068				-43.0068	-0.547355	78.572	0	0	0	78.572	78.572	0												0				0
OC	EUS	-0.0930323				-0.0930323	-0.0394859	2.35609	0	0	0	2.35609	2.35609	0												0				0
[C]	EUW	-0.0103211				-0.0103211	-0.0689392	0.149713	0	0	0	0.149713	0.149713	0												0				0
OC->C:	CNS	0.137222				0.137222	-0.215149	-0.6378	0	0	0	-0.6378	-0.6378	0												0				0
1.4	CNW	-0.947721				-0.947721	-0.367132	2.58142	0	0	0	2.58142	2.58142	0												0				0
	RWS	46.6018				46.6018	-0.743451	-62.6831	0	0	0	-62.6831	-62.6831	0												0				0
	RWW	35.696				35.696	-0.76317	-46.7733	0	0	0	-46.7733	-46.7733	0												0				0
	SHS					0	-999	0	0	0	0	0	0	0												0				0
	SHW					0	-999	0	0	0	0	0	0	0												0				0
	WDS	46.646				46.646	-0.998086	-46.7354	0	0	0	-46.7354	-46.7354	0												0				0
	WDW	34.738				34.738	-1.19924	-28.9666	0	0	0	-28.9666	-28.9666	0												0				0
NH3	EUS					0	-999	0	0	0	0	0	0	0												0				0
	EUW					0	-999	0	0	0	0	0	0	0												0				0
	CNS					0	-999	0	0	0	0	0	0	0												0				0
	CNW					0	-999	0	0	0	0	0	0	0												0				0
	RWS					0	-999	0	0	0	0	0	0	0												0				0
	RWW					0	-999	0	0	0	0	0	0	0												0				0
	WDS					0	-999	0	0	0	0	0	0	0												0				0
	WDW					0	-999	0	0	0	0	0	0	0												0				0
All	SHS	8.84899	-4.78888	4.03202	1.82786	9.91999	-2.81	-3.14911	1.70423	-1.43488	-0.650485	-3.53025	-1.44488	-2.08537				9.65869		0.363		0.145589				0.00627851				-0.00223434
	SHW	10.6306	-4.38023	5.03411	2.28215	13.5666	-2.81	-3.78313	1.5588	-1.7915	-0.812152	-4.82798	-2.22433	-2.60365				12.0592		0.363		0.145589				0.0423415				-0.0150681
CH4	Annual	-43.5139	-64.0078	-141.193		-248.714	-117.113	0.371555	0.546548	1.20561	0	2.12372	0.918104	1.20561												0.627186				-0.0053554
	N/A					0	-999	0	0	0	0	0	0	0												0				0

## Sheet: ECHAM6
ECLIPSE T4.3 Radiative Forcing Simulations (Absolute RF in mWm-2, Normalised RF in mWm-2 Tg[species]-1)											Perturbation codes: EUS Europe Summer, EUW Europe Winter, CNS China Summer, CNW China Winter, RWS Rest of the World Summer, RWW Rest of the World Winter, SHS Shipping Summer, SHW Shipping Winter, WDS World Summer, WDW World Winter
Model:		ECHAM6-HAMMOZ
		Latitude band 28S-28N
	Perturb	ADRF	AIRF	Total RF	DeltaEmi	nADRF	nAIRF	Total nRF	Total SLnRF	Total LLnRF							ADRF NI (from TOT and CTM2 ratio)				nADRF NI
SO2	EUS	-1.90915		-1.90915	0.754654	-2.52983	0	-2.52983	-2.52983	0							0.0290348				0.0384744
	EUW	-0.870349		-0.870349	0.822845	-1.05773	0	-1.05773	-1.05773	0							0.0468622				0.0569514
	CNS	-3.28391		-3.28391	3.07068	-1.06944	0	-1.06944	-1.06944	0							0.0339515				0.0110567
	CNW	-5.11059		-5.11059	3.26286	-1.56629	0	-1.56629	-1.56629	0							0.271732				0.0832804
	RWS	-16.7518		-16.7518	4.97903	-3.36447	0	-3.36447	-3.36447	0							0.619597				0.124441
	RWW	-16.9064		-16.9064	5.02554	-3.3641	0	-3.3641	-3.3641	0							0.898345				0.178756
	SHS				1.24748												0				0
	SHW				1.23947												0				0
	WDS	-21.9449		-21.9449	8.80436	-2.4925	0	-2.4925	-2.4925	0							0.606939				0.0689362
	WDW	-22.8873		-22.8873	9.11125	-2.51199	0	-2.51199	-2.51199	0							1.12966				0.123985
NOX	EUS
[NO2]	EUW
	CNS
	CNW
	RWS
	RWW
	SHS
	SHW
	WDS
	WDW
CO	EUS
	EUW
	CNS
	CNW
	RWS
	RWW
	SHS
	SHW
	WDS
	WDW
VOC	EUS
[C]	EUW
	CNS
	CNW
	RWS
	RWW
	SHS
	SHW
	WDS
	WDW
BC	EUS	0.873463		0.873463	0.03122	27.9777	0	27.9777	27.9777	0
[C]	EUW	0.446739		0.446739	0.0485559	9.20051	0	9.20051	9.20051	0
	CNS	0.469114		0.469114	0.110691	4.23805	0	4.23805	4.23805	0
	CNW	1.16575		1.16575	0.177134	6.58118	0	6.58118	6.58118	0
	RWS	13.2817		13.2817	0.3494	38.0129	0	38.0129	38.0129	0
	RWW	13.5614		13.5614	0.358214	37.8584	0	37.8584	37.8584	0
	SHS				0.0147238
	SHW				0.0146251
	WDS	14.6243		14.6243	0.491311	29.7658	0	29.7658	29.7658	0
	WDW	15.1739		15.1739	0.583904	25.987	0	25.987	25.987	0
OC	EUS	-0.0178819		-0.0178819	0.0373764	-0.478428	0	-0.478428	-0.478428	0
[C]	EUW	-0.0164992		-0.0164992	0.0686226	-0.240434	0	-0.240434	-0.240434	0
OC->C:	CNS	-0.0865679		-0.0865679	0.215786	-0.401175	0	-0.401175	-0.401175	0
1.4	CNW	-0.335566		-0.335566	0.367085	-0.914137	0	-0.914137	-0.914137	0
	RWS	-0.153828		-0.153828	0.801567	-0.191909	0	-0.191909	-0.191909	0
	RWW	-2.54139		-2.54139	0.822269	-3.0907	0	-3.0907	-3.0907	0
	SHS				0.0156937
	SHW				0.0156975
	WDS	-0.258278		-0.258278	1.05473	-0.244876	0	-0.244876	-0.244876	0
	WDW	-2.89346		-2.89346	1.25798	-2.30009	0	-2.30009	-2.30009	0
NH3	EUS
	EUW
	CNS
	CNW
	RWS
	RWW
	WDS
	WDW
All	SHS	-2.56765		-2.56765	1.2779	-2.00928	0	-2.00928	-2.00928	0
	SHW	-3.01318		-3.01318	1.26979	-2.37297	0	-2.37297	-2.37297	0
CH4	Summer
	Winter

## Sheet: Methane
Model	tau_OH_Control(yr)	tau_OH_perturb(yr)	tau_CH4_control(yr)	tau_CH4_perturb(yr)	Burden_Control(Tg[CH4])	Burden_Perturb(Tg[CH4])	DeltaBurden(Tg[CH4])	s	f	DeltaEmiss(Tg[CH4]/yr)	CH4_VMR_control(ppbv)	CH4_VMR_perturb(ppbv)	RF_CH4(Wm-2)	NRF_CH4(mWm-2/Tg[CH4])	NRF_SWV(mWm-2/Tg[CH4])	RF_Ozone(mWm-2)	NRF_Ozone(mWm-2/Tg[CH4]/yr)	NRF_O3/NRF_CH4
OsloCTM2	10.2429	9.61573	8.91171	8.43316	4909.33	4115.04	794.299	0.312737	1.45505	61.2556	1728.18	1448.57	0.108517	1.77155	0.265732	57.3486	0.936219	0.528475
HadGEM3	5.96	5.63	5.4834	5.20283	4560.8	3702.4	858.4	0.251891	1.3367	117.113	1605.49	1303.32	0.122776	1.04836	0.157254	64.0078	0.546548	0.521337
NorESM(S)	7.8	7.67	7.00337	6.89839	4814.81	4488.79	326.02	0.215415	1.27456	36.5239	1694.91	1580.14	0.0438092	1.19947	0.17992	19.926	0.545561	0.454837
NorESM(W)	7.8	7.67	7.00337	6.89839	4814.81	4497.57	317.24	0.22159	1.28467	35.2606	1694.91	1583.23	0.0426083	1.20838	0.181258	18.5016	0.524712	0.434226
													Formula in Table 3 of Myhre et al. (1998)		Stratospheric water vapour contribution (extra 15% Myhre et al., 2007)
tau_strat	120	yr
tau_soil	160	yr
Matm	5130000	Tg (assumes methane is well mixed throughout the atmosphere)
m_dry_air	28.966
m_methane	16.04
factor	0.35202	Conversion burden (Tg) to vmr (ppbv)
C0	1788	Reference methane mass-mixing ratio (ppb) (WMO Ozone Assessment Report)
N2O_mmr	325	pbb (WMO, 2014)

## Sheet: Best(OsloNitr)
# Best estimates of ECLIPSE T4.3 Radiative Forcing Simulations (Normalised RF in mWm-2 Tg[species]-1)														Best estimates are given for each main process.					Perturbation codes: EUS Europe Summer, EUW Europe Winter, CNS China Summer, CNW China Winter, RWS Rest of the World Summer, RWW Rest of the World Winter, SHS Shipping Summer, SHW Shipping Winter, WDS World Summer, WDW World Winter
#			Latitude band 28S-28N											Nitrate RF is directly taken from OsloCTM2 and added to NorESM, HadGEM3, and ECHAM6.											Note: Best/low/high estimates of total nRF are sums of component best/low/high estimates, not averages of modelled nRF.
# Model:			OsloCTM2							NorESM					HadGEM3					ECHAM6		Include in	Best							Low							High
Species	Units	Perturb	AD+IRF	BC_SNOW	BC_SEMID	Ozone	Methane	PM Ozone	Total nRF	AD+IRF	Ozone	Methane	PM Ozone	Total nRF	AD+IRF	Ozone	Methane	PM Ozone	Total nRF	AD+IRF	Total nRF		AD+IRF	BC_SNOW	BC_SEMID	Ozone	Methane	PM Ozone	Total nRF	AD+IRF	BC_SNOW	BC_SEMID	Ozone	Methane	PM Ozone	Total nRF	AD+IRF	BC_SNOW	BC_SEMID	Ozone	Methane	PM Ozone	Total nRF
SO2	SO2	EUS	-3.88956	0		0	0	0	-3.88956	-4.9701	0	0	0	-4.9701	-7.28274	0	0	0	-7.28274	-2.48907	-2.48907	O,N,H	-5.3808	0	0	0	0	0	-5.3808	-7.28274	0	0	0	0	0	-7.28274	-3.88956	0	0	0	0	0	-3.88956
SO2	SO2	EUW	-1.15244	0		0	0	0	-1.15244	-0.755027	0	0	0	-0.755027	-1.897	0	0	0	-1.897	-1.01562	-1.01562	O,N,H	-1.26815	0	0	0	0	0	-1.26815	-1.897	0	0	0	0	0	-1.897	-0.755027	0	0	0	0	0	-0.755027
SO2	SO2	CNS	-3.16502	0		0	0	0	-3.16502	-5.45767	0	0	0	-5.45767	-5.54624	0	0	0	-5.54624	-1.04865	-1.04865	O,N,H	-4.72298	0	0	0	0	0	-4.72298	-5.54624	0	0	0	0	0	-5.54624	-3.16502	0	0	0	0	0	-3.16502
SO2	SO2	CNW	-2.53996	0		0	0	0	-2.53996	-2.42949	0	0	0	-2.42949	-1.81812	0	0	0	-1.81812	-1.49959	-1.49959	O,N,H	-2.26252	0	0	0	0	0	-2.26252	-2.53996	0	0	0	0	0	-2.53996	-1.81812	0	0	0	0	0	-1.81812
SO2	SO2	RWS	-7.96934	0		0	0	0	-7.96934	-10.929	0	0	0	-10.929	-16.8147	0	0	0	-16.8147	-3.2123	-3.2123	O,N,H	-11.9044	0	0	0	0	0	-11.9044	-16.8147	0	0	0	0	0	-16.8147	-7.96934	0	0	0	0	0	-7.96934
SO2	SO2	RWW	-8.03572	0		0	0	0	-8.03572	-9.25107	0	0	0	-9.25107	-13.128	0	0	0	-13.128	-3.14444	-3.14444	O,N,H	-10.1382	0	0	0	0	0	-10.1382	-13.128	0	0	0	0	0	-13.128	-8.03572	0	0	0	0	0	-8.03572
SO2	SO2	SHS	-9.23971	0		0	0	0	-9.23971	0	0	0	0	0	0	0	0	0	0	0	0
SO2	SO2	SHW	-9.07582	0		0	0	0	-9.07582	0	0	0	0	0	0	0	0	0	0	0	0
SO2	SO2	WDS	-6.29651	0		0	0	0	-6.29651	-8.51757	0	0	0	-8.51757	-11.8069	0	0	0	-11.8069	-2.40331	-2.40331	O,N,H	-8.87367	0	0	0	0	0	-8.87367	-11.8069	0	0	0	0	0	-11.8069	-6.29651	0	0	0	0	0	-6.29651
SO2	SO2	WDW	-5.82133	0		0	0	0	-5.82133	-6.05207	0	0	0	-6.05207	-7.79438	0	0	0	-7.79438	-2.37339	-2.37339	O,N,H	-6.55593	0	0	0	0	0	-6.55593	-7.79438	0	0	0	0	0	-7.79438	-5.82133	0	0	0	0	0	-5.82133
NOX	NO2	EUS	-1.0248	0		0.179722	-0.859775	-0.395104	-2.09995	-0.401145	0.137011	-0.88733	-0.350948	-1.50241	0.342709	0.235604	-0.587128	-0.266167	-0.274981	0	0	O,N,H	-0.361078	0	0	0.184112	-0.778078	-0.337406	-1.29245	-1.0248	0	0	0.137011	-0.88733	-0.395104	-2.17022	0.342709	0	0	0.235604	-0.587128	-0.266167	-0.274981
NOX	NO2	EUW	-0.0294039	0		0.0305141	-0.408163	-0.187569	-0.594622	-0.0578184	0.00391738	-0.302979	-0.114401	-0.471281	-0.151362	0.0647063	-0.21384	-0.0969413	-0.397436	0	0	O,N,H	-0.0795279	0	0	0.0330459	-0.308327	-0.13297	-0.48778	-0.151362	0	0	0.00391738	-0.408163	-0.187569	-0.743176	-0.0294039	0	0	0.0647063	-0.21384	-0.0969413	-0.275478
NOX	NO2	CNS	-0.0246921	0		0.77574	-0.879881	-0.404343	-0.533177	-0.0334497	0.898244	-0.881059	-0.348468	-0.364733	-0.839023	0.979001	-0.622501	-0.282202	-0.764724	0	0	O,N,H	-0.299055	0	0	0.884329	-0.79448	-0.345005	-0.554211	-0.839023	0	0	0.77574	-0.881059	-0.404343	-1.34869	-0.0246921	0	0	0.979001	-0.622501	-0.282202	0.0496064
NOX	NO2	CNW	-0.405297	0		0.191321	-0.566219	-0.260202	-1.0404	-0.270337	0.184093	-0.455324	-0.171925	-0.713493	-0.459074	0.204085	-0.309424	-0.140273	-0.704685	0	0	O,N,H	-0.378236	0	0	0.193166	-0.443656	-0.1908	-0.819525	-0.459074	0	0	0.184093	-0.566219	-0.260202	-1.1014	-0.270337	0	0	0.204085	-0.309424	-0.140273	-0.515949
NOX	NO2	RWS	-0.188069	0		1.47079	-1.79487	-0.824821	-1.33697	0.394823	2.0652	-2.0976	-0.82962	-0.467192	-1.16118	2.04628	-1.57506	-0.714032	-1.404	0	0	O,N,H	-0.318142	0	0	1.86076	-1.82251	-0.789491	-1.06939	-1.16118	0	0	1.47079	-2.0976	-0.82962	-2.6176	0.394823	0	0	2.0652	-1.57506	-0.714032	0.170931
NOX	NO2	RWW	-0.390254	0		1.12093	-1.84848	-0.849454	-1.96726	0.499786	1.86535	-2.17594	-0.821608	-0.632411	-1.49243	1.72208	-1.61566	-0.732437	-2.11844	0	0	O,N,H	-0.460965	0	0	1.56945	-1.88002	-0.801166	-1.5727	-1.49243	0	0	1.12093	-2.17594	-0.849454	-3.39689	0.499786	0	0	1.86535	-1.61566	-0.732437	0.0170423
NOX	NO2	SHS	0.120441	0		2.16691	-3.38053	-1.5535	-2.64668	0	0	0	0	0	0	0	0	0	0	0	0
NOX	NO2	SHW	0.256207	0		1.94303	-4.17516	-1.91867	-3.89459	0	0	0	0	0	0	0	0	0	0	0	0
NOX	NO2	WDS	-0.184816	0		1.3362	-1.78791	-0.821623	-1.45815	0.224512	1.60464	-1.70323	-0.673644	-0.547721	-0.939442	1.65707	-1.28903	-0.584366	-1.15577	0	0	O,N,H	-0.299915	0	0	1.53264	-1.59339	-0.693211	-1.05388	-0.939442	0	0	1.3362	-1.78791	-0.821623	-2.21278	0.224512	0	0	1.65707	-1.28903	-0.584366	0.008183
NOX	NO2	WDW	-0.263023	0		0.969349	-1.82373	-0.838083	-1.95549	0.297059	1.28662	-1.58722	-0.599315	-0.602859	-1.09505	1.21657	-1.18329	-0.536426	-1.59819	0	0	O,N,H	-0.353673	0	0	1.15751	-1.53141	-0.657941	-1.38551	-1.09505	0	0	0.969349	-1.82373	-0.838083	-2.78752	0.297059	0	0	1.28662	-1.18329	-0.536426	-0.136034
CO	CO	EUS	-0.00152061	0		0.037248	0.123509	0.0567579	0.215995	0.0346541	0.0240941	0.094844	0.0375117	0.191104	0.0300194	0.0232275	0.0652449	0.0295779	0.14807	0	0	O,N,H	0.021051	0	0	0.0281899	0.0945327	0.0412825	0.185056	-0.00152061	0	0	0.0232275	0.0652449	0.0295779	0.11653	0.0346541	0	0	0.037248	0.123509	0.0567579	0.252169
CO	CO	EUW	-0.0112581	0		0.0330541	0.149012	0.0684774	0.239285	0.0223314	0.0277171	0.112342	0.0424191	0.20481	0.0696232	0.0305885	0.0796914	0.036127	0.21603	0	0	O,N,H	0.0268989	0	0	0.0304532	0.113682	0.0490079	0.220042	-0.0112581	0	0	0.0277171	0.0796914	0.036127	0.132277	0.0696232	0	0	0.0330541	0.149012	0.0684774	0.320167
CO	CO	CNS	-0.00254555	0		0.0687071	0.122427	0.0562603	0.244849	0.0206315	0.0538171	0.0875882	0.034642	0.196679	0.0723699	0.0550742	0.0573546	0.0260009	0.2108	0	0	O,N,H	0.030152	0	0	0.0591995	0.0891232	0.0389678	0.217442	-0.00254555	0	0	0.0538171	0.0573546	0.0260009	0.134627	0.0723699	0	0	0.0687071	0.122427	0.0562603	0.319764
CO	CO	CNW	-0.00970904	0		0.0528257	0.147725	0.0678861	0.258728	0.0249315	0.0466171	0.110868	0.0418624	0.224279	0.08326	0.0351279	0.0749445	0.0339751	0.227307	0	0	O,N,H	0.0328275	0	0	0.0448569	0.111179	0.0479079	0.236771	-0.00970904	0	0	0.0351279	0.0749445	0.0339751	0.134338	0.08326	0	0	0.0528257	0.147725	0.0678861	0.351697
CO	CO	RWS	-0.0184199	0		0.0919846	0.12957	0.059543	0.262678	0.0141628	0.0706272	0.0935277	0.0369911	0.215309	0.0628146	0.0584758	0.0636367	0.0288488	0.213776	0	0	O,N,H	0.0195192	0	0	0.0736959	0.0955781	0.0417943	0.230587	-0.0184199	0	0	0.0584758	0.0636367	0.0288488	0.132541	0.0628146	0	0	0.0919846	0.12957	0.059543	0.343912
CO	CO	RWW	-0.0177178	0		0.0781011	0.149568	0.0687331	0.278685	0.0213553	0.0634013	0.111343	0.042042	0.238142	0.0839179	0.0543742	0.077843	0.0352891	0.251424	0	0	O,N,H	0.0291851	0	0	0.0652922	0.112918	0.048688	0.256084	-0.0177178	0	0	0.0543742	0.077843	0.0352891	0.149788	0.0839179	0	0	0.0781011	0.149568	0.0687331	0.380321
CO	CO	SHS	-0.00516077	0		0.166094	0.0869565	0.0399603	0.28785	0	0	0	0	0	0	0	0	0	0	0	0
CO	CO	SHW	0.00821969	0		-0.0531714	0.176991	0.0813351	0.213374	0	0	0	0	0	0	0	0	0	0	0	0
CO	CO	WDS	-0.0135753	0		0.0834799	0.127462	0.0585743	0.255941	0.0168456	0.0639892	0.0920603	0.0364108	0.209306	0.0633679	0.0568456	0.062656	0.0284043	0.211274	0	0	O,N,H	0.0222127	0	0	0.0681049	0.0940595	0.0411298	0.225507	-0.0135753	0	0	0.0568456	0.062656	0.0284043	0.134331	0.0633679	0	0	0.0834799	0.127462	0.0585743	0.332884
CO	CO	WDW	-0.0148903	0		0.067798	0.14897	0.068458	0.270335	0.0225155	0.0562115	0.111253	0.0420076	0.231987	0.0831153	0.0486373	0.0772184	0.0350059	0.243977	0	0	O,N,H	0.0302469	0	0	0.057549	0.11248	0.0484905	0.248767	-0.0148903	0	0	0.0486373	0.0772184	0.0350059	0.145971	0.0831153	0	0	0.067798	0.14897	0.068458	0.368341
VOC	C	EUS	-0.497685	0		0.456589	0.64862	0.298069	0.905592	0.035598	0.270957	0.392273	0.155148	0.853976	1.35759	0.629542	0.442595	0.200645	2.63038	0	0	O,N,H	0.298502	0	0	0.452362	0.494496	0.217954	1.46331	-0.497685	0	0	0.270957	0.392273	0.155148	0.320693	1.35759	0	0	0.629542	0.64862	0.298069	2.93382
VOC	C	EUW	-0.461811	0		0.626524	0.168278	0.0773309	0.410322	-0.244089	0.270272	0.286306	0.108106	0.420595	-4.14282	0.903156	0.349882	0.158614	-2.73117	0	0	O,N,H	-1.61624	0	0	0.599984	0.268155	0.114684	-0.633416	-4.14282	0	0	0.270272	0.168278	0.0773309	-3.62694	-0.244089	0	0	0.903156	0.349882	0.158614	1.16756
VOC	C	CNS	-0.366867	0		1.46225	0.29883	0.137325	1.53154	-1.28309	0.97587	0.204688	0.0809562	-0.0215763	-0.1946	1.164	0.321495	0.145746	1.43664	0	0	O,N,H	-0.614852	0	0	1.20071	0.275005	0.121342	0.982202	-1.28309	0	0	0.97587	0.204688	0.0809562	-0.0215763	-0.1946	0	0	1.46225	0.321495	0.145746	1.73489
VOC	C	CNW	-0.149412	0		0.960051	0.0158441	0.00728106	0.833763	-0.386693	0.499826	0.290826	0.109813	0.513772	-2.46348	0.782829	0.469017	0.212623	-0.999014	0	0	O,N,H	-0.999863	0	0	0.747569	0.258563	0.109905	0.116174	-2.46348	0	0	0.499826	0.0158441	0.00728106	-1.94053	-0.149412	0	0	0.960051	0.469017	0.212623	1.49228
VOC	C	RWS	-1.1569	0		1.73044	0.775393	0.356326	1.70525	-1.51359	0.438975	0.329284	0.130235	-0.615093	0.713177	0.980989	0.373946	0.169523	2.23764	0	0	O,N,H	-0.652438	0	0	1.05013	0.492874	0.218695	1.10926	-1.51359	0	0	0.438975	0.329284	0.130235	-0.615093	0.713177	0	0	1.73044	0.775393	0.356326	3.57533
VOC	C	RWW	-1.0091	0		1.49598	0.742584	0.341249	1.57071	-1.58419	0.311922	0.417495	0.157641	-0.697131	0.956055	0.913751	0.54689	0.247925	2.66462	0	0	O,N,H	-0.545744	0	0	0.907216	0.56899	0.248939	1.1794	-1.58419	0	0	0.311922	0.417495	0.157641	-0.697131	0.956055	0	0	1.49598	0.742584	0.341249	3.53586
VOC	C	SHS	0.00196503	0		1.4637	1.23252	0.566395	3.26458	0	0	0	0	0	0	0	0	0	0	0	0
VOC	C	SHW	-0.0185771	0		1.47051	0.975682	0.448368	2.87599	0	0	0	0	0	0	0	0	0	0	0	0
VOC	C	WDS	-0.970958	0		1.59329	0.682322	0.313556	1.61821	-1.40011	0.489752	0.318875	0.126118	-0.465368	0.653152	0.985114	0.371666	0.16849	2.17842	0	0	O,N,H	-0.57264	0	0	1.02272	0.457621	0.202721	1.11042	-1.40011	0	0	0.489752	0.318875	0.126118	-0.465368	0.653152	0	0	1.59329	0.682322	0.313556	3.24232
VOC	C	WDW	-0.786612	0		1.31575	0.545727	0.250785	1.32565	-1.30245	0.338584	0.388778	0.146798	-0.428294	0.208198	0.894375	0.525662	0.238302	1.86654	0	0	O,N,H	-0.626956	0	0	0.849569	0.486722	0.211962	0.921297	-1.30245	0	0	0.338584	0.388778	0.146798	-0.428294	0.208198	0	0	1.31575	0.545727	0.250785	2.32046
BC	C	EUS	41.3435	4.5189e-07	-19.3195	0	0	0	22.0239	50.0046	0	0	0	50.0046	63.4787	0	0	0	63.4787	27.9777	27.9777	O,N,H	51.6089	4.5189e-07	-19.3195	0	0	0	32.2894	41.3435	4.5189e-07	-19.3195	0	0	0	22.0239	63.4787	4.5189e-07	-19.3195	0	0	0	44.1591
BC	C	EUW	10.652	0.000852249	-1.02411	0	0	0	9.62871	9.65183	0	0	0	9.65183	37.5118	0	0	0	37.5118	9.20051	9.20051	O,N,H	19.2719	0.000852249	-1.02411	0	0	0	18.2486	9.65183	0.000852249	-1.02411	0	0	0	8.62858	37.5118	0.000852249	-1.02411	0	0	0	36.4886
BC	C	CNS	37.7358	6.93227e-07	-22.3631	0	0	0	15.3727	71.8472	0	0	0	71.8472	32.4788	0	0	0	32.4788	4.23805	4.23805	O,N,H	47.3539	6.93227e-07	-22.3631	0	0	0	24.9908	32.4788	6.93227e-07	-22.3631	0	0	0	10.1157	71.8472	6.93227e-07	-22.3631	0	0	0	49.4841
BC	C	CNW	10.3063	0.0244408	0.435377	0	0	0	10.7661	21.0965	0	0	0	21.0965	-18.4442	0	0	0	-18.4442	6.58118	6.58118	O,N,H	4.31953	0.0244408	0.435377	0	0	0	4.77935	-18.4442	0.0244408	0.435377	0	0	0	-17.9844	21.0965	0.0244408	0.435377	0	0	0	21.5563
BC	C	RWS	91.5666	0.00118405	-50.9579	0	0	0	40.6099	127.151	0	0	0	127.151	215.665	0	0	0	215.665	38.0129	38.0129	O,N,H	144.794	0.00118405	-50.9579	0	0	0	93.8376	91.5666	0.00118405	-50.9579	0	0	0	40.6099	215.665	0.00118405	-50.9579	0	0	0	164.709
BC	C	RWW	71.5071	0.0338368	-27.9671	0	0	0	43.5738	107.18	0	0	0	107.18	138.251	0	0	0	138.251	37.8584	37.8584	O,N,H	105.646	0.0338368	-27.9671	0	0	0	77.713	71.5071	0.0338368	-27.9671	0	0	0	43.5738	138.251	0.0338368	-27.9671	0	0	0	110.318
BC	C	SHS	41.9135	6.50245e-06	-18.5292	0	0	0	23.3843	0	0	0	0	0	0	0	0	0	0	0	0				-18.5292							-18.5292							-18.5292
BC	C	SHW	29.4111	0.00358602	-7.84415	0	0	0	21.5705	0	0	0	0	0	0	0	0	0	0	0	0				-7.84415							-7.84415							-7.84415
BC	C	WDS	75.6145	0.000826578	-42.3216	0	0	0	33.2937	109.627	0	0	0	109.627	160.764	0	0	0	160.764	29.7658	29.7658	O,N,H	115.335	0.000826578	-42.3216	0	0	0	73.0145	75.6145	0.000826578	-42.3216	0	0	0	33.2937	160.764	0.000826578	-42.3216	0	0	0	118.443
BC	C	WDW	47.6451	0.0278261	-15.1366	0	0	0	32.5363	72.9852	0	0	0	72.9852	78.572	0	0	0	78.572	25.987	25.987	O,N,H	66.4007	0.0278261	-15.1366	0	0	0	51.292	47.6451	0.0278261	-15.1366	0	0	0	32.5363	78.572	0.0278261	-15.1366	0	0	0	63.4632
OC	C	EUS	-4.87431	0		0	0	0	-4.87431	-15.648	0	0	0	-15.648	2.35609	0	0	0	2.35609	-0.478428	-0.478428	O,N,H	-6.05542	0	0	0	0	0	-6.05542	-15.648	0	0	0	0	0	-15.648	2.35609	0	0	0	0	0	2.35609
OC	C	EUW	-1.37372	0		0	0	0	-1.37372	-1.7606	0	0	0	-1.7606	0.149713	0	0	0	0.149713	-0.240434	-0.240434	O,N,H	-0.99487	0	0	0	0	0	-0.99487	-1.7606	0	0	0	0	0	-1.7606	0.149713	0	0	0	0	0	0.149713
OC	C	CNS	-2.29721	0		0	0	0	-2.29721	-17.0441	0	0	0	-17.0441	-0.6378	0	0	0	-0.6378	-0.401175	-0.401175	O,N,H	-6.65971	0	0	0	0	0	-6.65971	-17.0441	0	0	0	0	0	-17.0441	-0.6378	0	0	0	0	0	-0.6378
OC	C	CNW	-2.70061	0		0	0	0	-2.70061	-8.29179	0	0	0	-8.29179	2.58142	0	0	0	2.58142	-0.914137	-0.914137	O,N,H	-2.80366	0	0	0	0	0	-2.80366	-8.29179	0	0	0	0	0	-8.29179	2.58142	0	0	0	0	0	2.58142
OC	C	RWS	-15.7884	0		0	0	0	-15.7884	-49.0746	0	0	0	-49.0746	-62.6831	0	0	0	-62.6831	-0.191909	-0.191909	O,N,H	-42.5153	0	0	0	0	0	-42.5153	-62.6831	0	0	0	0	0	-62.6831	-15.7884	0	0	0	0	0	-15.7884
OC	C	RWW	-18.8629	0		0	0	0	-18.8629	-48.5822	0	0	0	-48.5822	-46.7733	0	0	0	-46.7733	-3.0907	-3.0907	O,N,H	-38.0728	0	0	0	0	0	-38.0728	-48.5822	0	0	0	0	0	-48.5822	-18.8629	0	0	0	0	0	-18.8629
OC	C	SHS	-4.58868	0		0	0	0	-4.58868	0	0	0	0	0	0	0	0	0	0	0	0
OC	C	SHW	-4.65325	0		0	0	0	-4.65325	0	0	0	0	0	0	0	0	0	0	0	0
OC	C	WDS	-12.6887	0		0	0	0	-12.6887	-41.2322	0	0	0	-41.2322	-46.7354	0	0	0	-46.7354	-0.244876	-0.244876	O,N,H	-33.5521	0	0	0	0	0	-33.5521	-46.7354	0	0	0	0	0	-46.7354	-12.6887	0	0	0	0	0	-12.6887
OC	C	WDW	-13.2292	0		0	0	0	-13.2292	-34.3277	0	0	0	-34.3277	-28.9666	0	0	0	-28.9666	-2.30009	-2.30009	O,N,H	-25.5079	0	0	0	0	0	-25.5079	-34.3277	0	0	0	0	0	-34.3277	-13.2292	0	0	0	0	0	-13.2292
NH3	NH3	EUS	-0.029544	0		0	0	0	-0.029544	0	0	0	0	0	0	0	0	0	0	0	0	O	-0.029544	0	0	0	0	0	-0.029544	-0.029544	0	0	0	0	0	-0.029544	-0.029544	0	0	0	0	0	-0.029544
NH3	NH3	EUW	-0.0404426	0		0	0	0	-0.0404426	0	0	0	0	0	0	0	0	0	0	0	0	O	-0.0404426	0	0	0	0	0	-0.0404426	-0.0404426	0	0	0	0	0	-0.0404426	-0.0404426	0	0	0	0	0	-0.0404426
NH3	NH3	CNS	-0.0416723	0		0	0	0	-0.0416723	0	0	0	0	0	0	0	0	0	0	0	0	O	-0.0416723	0	0	0	0	0	-0.0416723	-0.0416723	0	0	0	0	0	-0.0416723	-0.0416723	0	0	0	0	0	-0.0416723
NH3	NH3	CNW	-0.452145	0		0	0	0	-0.452145	0	0	0	0	0	0	0	0	0	0	0	0	O	-0.452145	0	0	0	0	0	-0.452145	-0.452145	0	0	0	0	0	-0.452145	-0.452145	0	0	0	0	0	-0.452145
NH3	NH3	RWS	-0.416618	0		0	0	0	-0.416618	0	0	0	0	0	0	0	0	0	0	0	0	O	-0.416618	0	0	0	0	0	-0.416618	-0.416618	0	0	0	0	0	-0.416618	-0.416618	0	0	0	0	0	-0.416618
NH3	NH3	RWW	-0.871749	0		0	0	0	-0.871749	0	0	0	0	0	0	0	0	0	0	0	0	O	-0.871749	0	0	0	0	0	-0.871749	-0.871749	0	0	0	0	0	-0.871749	-0.871749	0	0	0	0	0	-0.871749
NH3	NH3	WDS	-0.29014	0		0	0	0	-0.29014	0	0	0	0	0	0	0	0	0	0	0	0	O	-0.29014	0	0	0	0	0	-0.29014	-0.29014	0	0	0	0	0	-0.29014	-0.29014	0	0	0	0	0	-0.29014
NH3	NH3	WDW	-0.700057	0		0	0	0	-0.700057	0	0	0	0	0	0	0	0	0	0	0	0	O	-0.700057	0	0	0	0	0	-0.700057	-0.700057	0	0	0	0	0	-0.700057	-0.700057	0	0	0	0	0	-0.700057
Ship_All	Multiple	SHS	-3.05688	7.80294e-08	-0.0752192	1.28514	-1.89106	-0.869021	-4.60704	-5.91811	1.45387	-1.73114	-0.684682	-6.88007	-3.15127	1.70423	-1.43488	-0.650485	-3.53241	-2.01144	-2.01144	O,N,H	-4.04209	7.80294e-08	-0.0752192	1.48108	-1.68569	-0.734729	-5.05665	-5.91811	7.80294e-08	-0.0752192	1.28514	-1.89106	-0.869021	-7.46827	-3.05688	7.80294e-08	-0.0752192	1.70423	-1.43488	-0.650485	-3.51324
Ship_All	Multiple	SHW	-2.9707	4.30323e-05	-0.0323721	1.14815	-2.34546	-1.07784	-5.27818	-5.6405	1.36945	-2.12469	-0.802257	-7.198	-3.79492	1.5588	-1.7915	-0.812152	-4.83977	-2.38476	-2.38476	O,N,H	-4.13537	4.30323e-05	-0.0323721	1.3588	-2.08722	-0.897416	-5.79353	-5.6405	4.30323e-05	-0.0323721	1.14815	-2.34546	-1.07784	-7.94798	-2.9707	4.30323e-05	-0.0323721	1.5588	-1.7915	-0.802257	-4.03799
CH4	CH4	Summer	-0.0253333	0		0.936219	2.03728	0	2.94817	0.13656	0.545561	1.37939	0	2.06151	0.371926	0.546548	1.20561	0	2.12409	0	0	O,N,H	0.145824	0	0	0.63826	1.50298	0	2.28706	-0.0253333	0	0	0.524712	1.20561	0	1.70499	0.371926	0	0	0.936219	2.03728	0	3.34543
CH4	CH4	Winter	0	0		0	0	0	0	0.100142	0.524712	1.38964	0	2.0145	0	0	0	0	0	0	0			0	0						0	0						0	0
