# Supplementary material for: Regional and seasonal radiative forcing by perturbations to aerosol and ozone precursor emissions
Source: Copernicus journal article supplement (doi:10.5194/acp-2016-310), 2016-04-27
Supplement: Supplementary file 7 [file eclipse_t4-3_results_oslonitr_60N-90N_final.xlsx]

## Sheet: OsloCTM2
ECLIPSE T4.3 Radiative Forcing Simulations (Absolute RF in mWm-2, Normalised RF in mWm-2 Tg[species]-1)											Perturbation codes: EUS Europe Summer, EUW Europe Winter, CNS China Summer, CNW China Winter, RWS Rest of the World Summer, RWW Rest of the World Winter, SHS Shipping Summer, SHW Shipping Winter, WDS World Summer, WDW World Winter
Model:		OsloCTM2
		Latitude band 60N-90N
	Perturb	ADRF SU	ADRF NI	ADRF SOA	ADRF BC	ADRF OC	AIRF	BC_SNOW	SW O3	LW O3	CH4	PM O3	Total RF	DeltaEmi	nADRF SU	nADRF NI	nADRF SOA	nADRF BC	nADRF OC	nAIRF	nBC_SNOW	nSW O3	nLW O3	nCH4	nPM O3	Total nRF	Total SLnRF	Total LLnRF					ADRF NI/ADRF TOT			ADRF NI/AD+IRF TOT
SO2	EUS	-2.66854	0.0979773				-1.69893						-4.26949	0.768	-3.47466	0.127575	0	0	0	-2.21215		0	0	0	0	-5.55924	-5.55924	0					-0.0367157			-0.0224334
	EUW	-1.30666	0.0608168				-0.038772						-1.28462	0.83	-1.57429	0.0732733	0	0	0	-0.0467133		0	0	0	0	-1.54773	-1.54773	0					-0.0465437			-0.0452024
	CNS	-5.01111	0.0808572				-0.482013						-5.41227	3.149	-1.59133	0.0256771	0	0	0	-0.153069		0	0	0	0	-1.71873	-1.71873	0					-0.0161356			-0.0147197
	CNW	-2.05529	0.0158614				-0.0245333						-2.06396	3.317	-0.619623	0.00478185	0	0	0	-0.00739623		0	0	0	0	-0.622238	-0.622238	0					-0.00771735			-0.00762632
	RWS	-11.9182	0.210067				-5.81526						-17.5234	5.156	-2.31152	0.0407422	0	0	0	-1.12786		0	0	0	0	-3.39864	-3.39864	0					-0.0176257			-0.0118458
	RWW	-4.9414	0.100874				-0.0714573						-4.91198	5.15	-0.959495	0.0195872	0	0	0	-0.0138752		0	0	0	0	-0.953783	-0.953783	0					-0.0204141			-0.0201231
	SHS	-1.10559	0.0209877				-1.52248						-2.60708	1.048	-1.05495	0.0200264	0	0	0	-1.45275		0	0	0	0	-2.48767	-2.48767	0					-0.0189833			-0.00798597
	SHW	-0.606397	0.00744083				-0.0203583						-0.619314	1.031	-0.588164	0.0072171	0	0	0	-0.0197462		0	0	0	0	-0.600693	-0.600693	0					-0.0122706			-0.011872
	WDS	-20.7034	0.409889				-9.51868						-29.8122	10.121	-2.04559	0.0404989	0	0	0	-0.940488		0	0	0	0	-2.94558	-2.94558	0					-0.0197981			-0.0135626
	WDW	-8.90975	0.184993				-0.155121						-8.87987	10.328	-0.862679	0.0179118	0	0	0	-0.0150195		0	0	0	0	-0.859786	-0.859786	0					-0.020763			-0.0204077
NOX	EUS	-0.0389277	-0.0403406				-0.125523		0.744799	0.822628	-0.84	-0.129794	0.392842	0.977	-0.0398441	-0.0412903	0	0	0	-0.128478		0.762333	0.841994	-0.859775	-0.132849	0.40209	1.39471	-0.992624					1.0363			0.245305
[NO2]	EUW	-0.0111733	-0.0288448				-0.00890265		0.386703	0.27227	-0.42	-0.0648968	0.125155	1.029	-0.0108584	-0.0280319	0	0	0	-0.00865175		0.375805	0.264597	-0.408163	-0.0630679	0.121628	0.592859	-0.471231					2.58158			1.43678
	CNS	0.0268941	-0.00843968				0.00332389		0.735158	1.20004	-1.78	-0.275039	-0.0980627	2.023	0.0132942	-0.00417186	0	0	0	0.00164305		0.3634	0.593198	-0.879881	-0.135956	-0.0484739	0.967363	-1.01584					-0.313812			-0.279293
	CNW	0.0284398	-0.00342505				0.00604801		0.587097	0.623941	-1.18	-0.182329	-0.120228	2.084	0.0136467	-0.0016435	0	0	0	0.00290212		0.281716	0.299396	-0.566219	-0.08749	-0.0576912	0.596018	-0.653709					-0.120432			-0.0993119
	RWS	0.0276723	-0.07381				-0.460275		3.29443	4.16664	-11.41	-1.76303	-6.21837	6.357	0.00435304	-0.0116108	0	0	0	-0.0724044		0.518237	0.655441	-1.79487	-0.277337	-0.978193	1.09402	-2.07221					-2.66729			0.170618
	RWW	0.0716986	-0.0416929				0.0254411		1.88076	2.01262	-11.76	-1.81711	-9.62828	6.362	0.0112698	-0.00655343	0	0	0	0.00399892		0.295624	0.31635	-1.84848	-0.28562	-1.51341	0.62069	-2.13409					-0.581502			-0.429206
	SHS	0.669422	-0.0254524				0.179444		1.22021	1.5198	-5.73	-0.885378	-3.05195	1.695	0.394939	-0.0150162	0	0	0	0.105867		0.719888	0.896637	-3.38053	-0.522347	-1.80056	2.10231	-3.90288					-0.0380215			-0.029984
	SHW	0.361386	-0.00830871				0.0112453		0.905759	1.02167	-6.96	-1.07543	-5.74368	1.667	0.216788	-0.00498423	0	0	0	0.00674583		0.543347	0.612879	-4.17516	-0.645131	-3.44552	1.37478	-4.8203					-0.0229912			-0.0222974
	WDS	0.685061	-0.148043				-0.40303		5.9946	7.70911	-19.76	-3.05324	-8.97555	11.052	0.0619852	-0.0133951	0	0	0	-0.0364667		0.542399	0.697531	-1.78791	-0.276261	-0.81212	1.25205	-2.06417					-0.216102			-0.524917
	WDW	0.450351	-0.0822715				0.0338318		3.76032	3.9305	-20.32	-3.13977	-15.367	11.142	0.0404192	-0.0073839	0	0	0	0.00303642		0.33749	0.352764	-1.82373	-0.281796	-1.3792	0.726327	-2.10553					-0.182683			-0.169918
CO	EUS	0.00879347	0.000434905	0.000635371			-0.0147737		0.0414798	0.0866792	0.29	0.0448097	0.458059	2.348	0.00374509	0.000185224	0.000270601	0	0	-0.00629204		0.017666	0.0369162	0.123509	0.0190842	0.195085	0.0524911	0.142594					0.046125			-0.0813688
	EUW	0.00488397	9.56783e-05	-0.000119891			-0.01824		0.0664831	0.0795609	0.46	0.0710775	0.663741	3.087	0.00158211	3.09939e-05	-3.88374e-05	0	0	-0.00590865		0.0215365	0.0257729	0.149012	0.0230248	0.215012	0.042975	0.172037					0.0196879			-0.00709995
	CNS	0.0515677	0.0024182	0.002329			-0.0460956		0.154564	0.457596	1.57	0.242591	2.43497	12.824	0.00402119	0.000188568	0.000181613	0	0	-0.00359448		0.0120527	0.0356828	0.122427	0.0189169	0.189876	0.0485324	0.141344					0.0429407			0.309982
	CNW	0.0445558	0.000919089	-0.00186719			-0.0706582		0.277375	0.387453	2.51	0.387836	3.53561	16.991	0.00262232	5.40927e-05	-0.000109893	0	0	-0.00415857		0.0163248	0.0228034	0.147725	0.022826	0.208087	0.0375362	0.170551					0.0215301			-0.0328603
	RWS	0.0190236	0.00258876	0.00444013			-0.0674796		0.209638	0.792787	4.54	0.701504	6.2025	35.039	0.000542926	7.38822e-05	0.00012672	0	0	-0.00192584		0.00598299	0.0226258	0.12957	0.0200207	0.177017	0.0274265	0.149591					0.11033			-0.0588142
	RWW	0.0553177	0.00140594	-0.00104943			-0.0918353		0.373363	0.62676	5.25	0.811211	7.02517	35.101	0.00157596	4.00541e-05	-2.98974e-05	0	0	-0.00261632		0.0106368	0.0178559	0.149568	0.0231108	0.200142	0.0274625	0.172679					0.0259072			-0.0374248
	SHS	0.000656389	-6.97053e-05	-4.43878e-05					-0.00116271	0.000167455	0.01	0.00154516	0.0110922	0.115	0.00570773	-0.000606133	-0.000385981	0	0	0		-0.0101105	0.00145613	0.0869565	0.0134362	0.0964539	-0.00393877	0.100393					-0.113897			-0.113897
	SHW	0.000843277	0.000154922	-0.000139994					0.00154416	0.0030854	0.02	0.00309033	0.0285781	0.113	0.00746263	0.00137099	-0.00123888	0	0	0		0.0136651	0.0273044	0.176991	0.027348	0.252903	0.0485643	0.204339					0.220284			0.220284
	WDS	0.0793848	0.00544187	0.0074045			-0.128349		0.405682	1.33706	6.4	0.988904	9.09553	50.211	0.00158102	0.00010838	0.000147468	0	0	-0.00255619		0.00807954	0.0266289	0.127462	0.019695	0.181146	0.0339891	0.147157					0.062702			-0.130941
	WDW	0.104757	0.00242071	-0.00303651			-0.180733		0.717221	1.09377	8.22	1.27012	11.2245	55.179	0.0018985	4.38701e-05	-5.50302e-05	0	0	-0.0032754		0.0129981	0.0198223	0.14897	0.0230182	0.20342	0.0314323	0.171988					0.0237975			-0.030637
VOC	EUS	0.0157301	0.00139911	-0.0967027			-0.0926294		0.174752	0.220023	0.13	0.0200871	0.372659	0.200426	0.0784835	0.0069807	-0.482487	0	0	-0.462164		0.871905	1.09778	0.64862	0.100222	1.85934	1.1105	0.748842					-0.0172788			-0.0080593
[C]	EUW	0.0590823	0.00446995	-0.0852759			-0.0209136		0.291662	0.239627	0.04	0.00618065	0.534832	0.237702	0.248556	0.0188048	-0.358751	0	0	-0.0879824		1.22701	1.0081	0.168278	0.0260017	2.25001	2.05573	0.19428					-0.17065			-0.0948889
VOC->C:	CNS	0.0613938	-0.00288528	-0.130327			-0.0413252		0.235734	0.452059	0.15	0.0231774	0.747827	0.501957	0.122309	-0.00574806	-0.259638	0	0	-0.0823281		0.469629	0.900592	0.29883	0.0461741	1.48982	1.14482	0.345004					0.0418562			0.0261683
0.255319	CNW	0.141227	-0.000462618	-0.151696			-0.0208348		0.38044	0.432707	0.01	0.00154516	0.792926	0.631149	0.223762	-0.000732978	-0.240349	0	0	-0.0330109		0.602774	0.685586	0.0158441	0.00244817	1.25632	1.23803	0.0182923					0.0441893			0.0147783
	RWS	-0.035875	0.00193036	-0.427062			-0.162165		0.389156	0.98467	1.66	0.256497	2.66715	2.14085	-0.0167574	0.000901679	-0.199482	0	0	-0.0757479		0.181776	0.459943	0.775393	0.119811	1.24584	0.350634	0.895203					-0.00416981			-0.00308807
	RWW	0.150799	0.00395981	-0.45176			-0.0672715		0.779192	0.940462	1.6	0.247226	3.20261	2.15464	0.0699881	0.00183781	-0.209669	0	0	-0.0312217		0.361635	0.436483	0.742584	0.114741	1.48638	0.629053	0.857325					-0.0131572			-0.0107536
	SHS	2.94325e-05	-0.000225524	-0.00159633					0.0160701	-0.017946	0.09	0.0139065	0.100238	0.0730213	0.000403067	-0.00308847	-0.0218612	0	0	0		0.220074	-0.245764	1.23252	0.190444	1.37273	-0.0502363	1.42296					0.14393			0.14393
	SHW	0.00709113	0.000149358	-0.00166072					0.0304287	-0.0194804	0.07	0.0108161	0.0973442	0.0717447	0.0988384	0.0020818	-0.0231476	0	0	0		0.424125	-0.271524	0.975682	0.150759	1.35681	0.230373	1.12644					0.027504			0.027504
	WDS	0.0412489	0.00044419	-0.654092			-0.29612		0.799642	1.65675	1.94	0.299762	3.78764	2.84323	0.0145077	0.000156227	-0.230052	0	0	-0.104149		0.281244	0.5827	0.682322	0.10543	1.33216	0.544407	0.787751					-0.000724803			-0.000488678
	WDW	0.351108	0.00796714	-0.688732			-0.10902		1.45129	1.6128	1.65	0.254952	4.53037	3.02349	0.116127	0.00263508	-0.227794	0	0	-0.0360576		0.480006	0.533422	0.545727	0.0843237	1.49839	0.868339	0.630051					-0.0235977			-0.0178378
BC	EUS				3.91193		-0.0956095	0.901012					4.71733	0.03	0	0	0	130.398	0	-3.18698	30.0337	0	0	0	0	157.244	157.244	0					0			0
[C]	EUW				2.94987		-0.00342792	9.88399					12.8304	0.047	0	0	0	62.7632	0	-0.0729345	210.298	0	0	0	0	272.988	272.988	0					0			0
	CNS				6.84372		-0.0219557	1.2768					8.09856	0.11	0	0	0	62.2156	0	-0.199597	11.6073	0	0	0	0	73.6233	73.6233	0					0			0
	CNW				3.93427		-0.000740391	7.96649					11.9	0.177	0	0	0	22.2275	0	-0.004183	45.0084	0	0	0	0	67.2317	67.2317	0					0			0
	RWS				18.5808		-0.304447	4.0631					22.3395	0.351	0	0	0	52.9368	0	-0.86737	11.5758	0	0	0	0	63.6452	63.6452	0					0			0
	RWW				15.0463		-0.00362429	24.9065					39.9492	0.359	0	0	0	41.9117	0	-0.0100955	69.3774	0	0	0	0	111.279	111.279	0					0			0
	SHS				0.625222		-0.0227978	0.300456					0.90288	0.012	0	0	0	52.1018	0	-1.89982	25.038	0	0	0	0	75.24	75.24	0					0			0
	SHW				0.441605		-0.000310965	1.42528					1.86657	0.012	0	0	0	36.8004	0	-0.0259137	118.773	0	0	0	0	155.548	155.548	0					0			0
	WDS				29.9617		-0.44481	6.54137					36.0582	0.503	0	0	0	59.5659	0	-0.884314	13.0047	0	0	0	0	71.6863	71.6863	0					0			0
	WDW				22.372		-0.00810357	44.1823					66.5462	0.595	0	0	0	37.6001	0	-0.0136194	74.2559	0	0	0	0	111.842	111.842	0					0			0
OC	EUS					-0.159501	-0.135246						-0.294747	0.037	0	0	0	0	-4.31084	-3.6553		0	0	0	0	-7.96614	-7.96614	0					0			0
[C]	EUW					-0.0936509	-0.00582026						-0.0994712	0.067	0	0	0	0	-1.39777	-0.0868696		0	0	0	0	-1.48464	-1.48464	0					0			0
	CNS					-0.128492	-0.0341865						-0.162679	0.212	0	0	0	0	-0.606094	-0.161257		0	0	0	0	-0.767351	-0.767351	0					0			0
	CNW					-0.0516615	-0.000114319						-0.0517758	0.366	0	0	0	0	-0.141152	-0.000312347		0	0	0	0	-0.141464	-0.141464	0					0			0
	RWS					-0.327504	-0.228996						-0.5565	0.804	0	0	0	0	-0.407343	-0.284821		0	0	0	0	-0.692164	-0.692164	0					0			0
	RWW					-0.144569	-0.00376936						-0.148338	0.825	0	0	0	0	-0.175235	-0.00456892		0	0	0	0	-0.179804	-0.179804	0					0			0
	SHS					-0.0189522							-0.0189522	0.013	0	0	0	0	-1.45786	0		0	0	0	0	-1.45786	-1.45786	0					0			0
	SHW					-0.0062311							-0.0062311	0.013	0	0	0	0	-0.479315	0		0	0	0	0	-0.479315	-0.479315	0					0			0
	WDS					-0.615497	-0.398429						-1.01393	1.053	0	0	0	0	-0.584518	-0.378375		0	0	0	0	-0.962892	-0.962892	0					0			0
	WDW					-0.289881	-0.00970394						-0.299585	1.258	0	0	0	0	-0.23043	-0.00771378		0	0	0	0	-0.238144	-0.238144	0					0			0
NH3	EUS	0.000677516	-0.151868				-0.0412893						-0.19248	0.388	0.00174618	-0.391412	0	0	0	-0.106416		0	0	0	0	-0.496082	-0.496082	0					-224.154			3.73951
	EUW	-0.00680309	-0.0945574				-0.00862837						-0.109989	0.384	-0.0177164	-0.246243	0	0	0	-0.0224697		0	0	0	0	-0.286429	-0.286429	0					13.8992			6.12757
	CNS	-0.00360982	-0.033502				-0.000393305						-0.0375051	1.365	-0.00264456	-0.0245436	0	0	0	-0.000288136		0	0	0	0	-0.0274763	-0.0274763	0					9.2808			8.36896
	CNW	-0.00299612	-0.0127058				-0.00945022						-0.0251521	1.351	-0.00221771	-0.00940474	0	0	0	-0.00699498		0	0	0	0	-0.0186174	-0.0186174	0					4.24075			1.02085
	RWS	0.00170379	-0.118116				-0.0128351						-0.129247	3.481	0.000489454	-0.0339316	0	0	0	-0.00368719		0	0	0	0	-0.0371294	-0.0371294	0					-69.3254			10.6111
	RWW	-0.0021583	-0.104925				-0.00434342						-0.111427	3.426	-0.000629977	-0.0306261	0	0	0	-0.00126778		0	0	0	0	-0.0325239	-0.0325239	0					48.6147			16.138
	WDS	-0.00122851	-0.303486				-0.0545177						-0.359232	5.234	-0.000234718	-0.0579836	0	0	0	-0.0104161		0	0	0	0	-0.0686344	-0.0686344	0					247.035			5.44406
	WDW	-0.0119575	-0.212188				-0.022422						-0.246568	5.161	-0.0023169	-0.0411138	0	0	0	-0.00434451		0	0	0	0	-0.0477752	-0.0477752	0					17.7452			6.17194
All	SHS	-0.435482	-0.00475993	-0.00164072	0.625222	-0.0189522	-1.36583	0.300456	1.23512	1.50202	-5.59	-0.863746	-4.6176	2.95602	-0.14732	-0.00161025	-0.000555043	0.211508	-0.00641139	-0.462051	0.101642	0.417831	0.508123	-1.89106	-0.292199	-1.5621	0.621155	-2.18325					-0.0281408			0.00397759
	SHW	-0.237077	-0.0005636	-0.00180071	0.441605	-0.0062311	-0.00942396	1.42528	0.937732	1.00528	-6.82	-1.0538	-4.31901	2.90774	-0.0815328	-0.000193827	-0.000619282	0.151872	-0.00214293	-0.00324099	0.490167	0.322495	0.345723	-2.34546	-0.362412	-1.48535	1.22253	-2.70787					-0.00286824			-0.00301273
CH4	Annual	-1.6724	0.022694	0.097901					6.63454	12.6483	124.795		142.526	61.2556	-0.027302	0.000370481	0.00159824	0	0	0		0.108309	0.206484	2.03728	0	2.32674	0.28946	2.03728					-0.0144135			-0.0144135
	Winter

## Sheet: NorESM
ECLIPSE T4.3 Radiative Forcing Simulations (Absolute RF in mWm-2, Normalised RF in mWm-2 Tg[species]-1)											Perturbation codes: EUS Europe Summer, EUW Europe Winter, CNS China Summer, CNW China Winter, RWS Rest of the World Summer, RWW Rest of the World Winter, SHS Shipping Summer, SHW Shipping Winter, WDS World Summer, WDW World Winter
Model:		NorESM
		Latitude band 60N-90N
	Perturb	ADRF	AIRF	SW O3	LW O3	CH4	PM O3	Total RF	DeltaEMI	nADRF	nAIRF	nSW O3	nLW O3	nCH4	nPM O3	Total nRF	Total SLnRF	Total LLnRF				ADRF NI (from TOT and CTM2 ratio)				nADRF NI
SO2	EUS	-5.73222	-8.42849					-14.1607	0.772418	-7.42114	-10.9118	0	0	0	0	-18.333	-18.333	0				0.210462				0.272472
	EUW	-2.73078	-2.65461					-5.38539	0.845032	-3.23157	-3.14143	0	0	0	0	-6.373	-6.373	0				0.127101				0.150409
	CNS	-9.93064	-14.7588					-24.6894	3.14062	-3.162	-4.69933	0	0	0	0	-7.86133	-7.86133	0				0.160237				0.0510208
	CNW	-4.47844	-5.88082					-10.3593	3.35299	-1.33566	-1.7539	0	0	0	0	-3.08956	-3.08956	0				0.0345617				0.0103077
	RWS	-21.3872	-39.958					-61.3452	5.09299	-4.19934	-7.84569	0	0	0	0	-12.045	-12.045	0				0.376965				0.0740165
	RWW	-8.85608	-9.49478					-18.3509	5.16615	-1.71425	-1.83788	0	0	0	0	-3.55213	-3.55213	0				0.180788				0.0349948
	SHS							0	1.03896	0	0	0	0	0	0	0	0	0				0				0
	SHW							0	1.03896	0	0	0	0	0	0	0	0	0				0				0
	WDS	-37.0501	-63.1453					-100.195	9.00603	-4.11392	-7.01145	0	0	0	0	-11.1254	-11.1254	0				0.733522				0.0814479
	WDW	-16.0653	-18.0302					-34.0955	9.36417	-1.71561	-1.92545	0	0	0	0	-3.64106	-3.64106	0				0.333564				0.0356213
NOX	EUS	-0.0306528	-0.179101	1.063	0.885059	-0.88366	-0.231018	0.623627	0.995864	-0.0307801	-0.179845	1.06741	0.888735	-0.88733	-0.231978	0.626217	1.74552	-1.11931				-0.0317654				-0.0318973
[NO2]	EUW	0.00390891	-0.27493	0.419746	0.148235	-0.3214	-0.0361636	-0.0606037	1.0608	0.00368487	-0.259172	0.395688	0.139739	-0.302979	-0.0340909	-0.0571302	0.27994	-0.33707				0.0100912				0.0095128
	CNS	0.0345937	-1.03154	1.00933	1.34569	-1.77983	-0.465307	-0.887063	2.0201	0.0171247	-0.510638	0.499643	0.66615	-0.881059	-0.230338	-0.439118	0.67228	-1.1114				-0.0108559				-0.00537394
	CNW	-0.12583	-0.461278	0.486498	0.291998	-0.96133	-0.108168	-0.87811	2.11131	-0.0595981	-0.21848	0.230425	0.138302	-0.455324	-0.0512326	-0.415908	0.0906489	-0.506557				0.0151539				0.00717749
	RWS	-0.197274	-0.972034	4.05445	4.43659	-13.1557	-3.43933	-9.27327	6.27179	-0.0314542	-0.154985	0.646459	0.707389	-2.0976	-0.548381	-1.47857	1.16741	-2.64598				0.526187				0.0838974
	RWW	0.401845	-1.05726	1.58038	1.12381	-13.868	-1.56042	-13.3797	6.37335	0.0630508	-0.165888	0.247967	0.176329	-2.17594	-0.244834	-2.09931	0.321459	-2.42077				-0.233674				-0.0366642
	SHS							0	1.09606	0	0	0	0	0	0	0	0	0				0				0
	SHW							0	1.09606	0	0	0	0	0	0	0	0	0				0				0
	WDS	-0.193333	-2.18267	6.12678	6.66734	-15.8192	-4.13566	-9.5367	9.28775	-0.0208159	-0.235006	0.659662	0.717864	-1.70323	-0.445281	-1.0268	1.1217	-2.14851				0.0417796				0.00449835
	WDW	0.279924	-1.79347	2.48662	1.56404	-15.1508	-1.70475	-14.3184	9.54546	0.0293253	-0.187887	0.260503	0.163852	-1.58722	-0.178592	-1.50002	0.265794	-1.76581				-0.0511373				-0.00535724
CO	EUS	0.00524205	0.129827	0.0644985	0.0400194	0.23461	0.0613349	0.535532	2.47364	0.00211916	0.0524842	0.0260743	0.0161783	0.094844	0.0247954	0.216495	0.096856	0.119639				0.000241789				9.77463e-05
	EUW	0.0104175	0.27324	0.090863	0.0402932	0.34922	0.0392939	0.803328	3.10853	0.00335126	0.0879	0.0292302	0.0129621	0.112342	0.0126407	0.258427	0.133444	0.124983				0.000205098				6.59792e-05
	CNS	0.0456953	0.835174	0.230018	0.411699	1.13046	0.29554	2.94859	12.9065	0.00354048	0.0647094	0.0178218	0.0318985	0.0875882	0.0228985	0.228457	0.11797	0.110487				0.00196219				0.000152031
	CNW	0.0662527	0.999873	0.327994	0.235707	1.89796	0.213557	3.74134	17.1191	0.0038701	0.0584068	0.0191595	0.0137686	0.110868	0.0124747	0.218548	0.0952051	0.123343				0.00142643				8.33236e-05
	RWS	-0.0031355	0.606564	0.312949	0.639736	3.24023	0.847104	5.64345	34.6446	-9.05047e-05	0.0175082	0.00903312	0.0184657	0.0935277	0.0244512	0.162895	0.0449165	0.117979				-0.000345941				-9.98541e-06
	RWW	0.0382509	1.11326	0.470008	0.427446	3.91534	0.44055	6.40485	35.1645	0.00108777	0.0316586	0.013366	0.0121556	0.111343	0.0125283	0.18214	0.058268	0.123872				0.000990974				2.81811e-05
	SHS							0	0.114038	0	0	0	0	0	0	0	0	0				0				0
	SHW							0	0.114038	0	0	0	0	0	0	0	0	0				0				0
	WDS	0.0478018	1.57157	0.607465	1.09145	4.6053	1.20398	9.12757	50.0248	0.000955563	0.0314157	0.0121433	0.0218183	0.0920603	0.0240676	0.182461	0.0663328	0.116128				0.00299727				5.99158e-05
	WDW	0.114921	2.38637	0.888865	0.703446	6.16252	0.6934	10.9495	55.3922	0.00207468	0.0430814	0.0160468	0.0126994	0.111253	0.012518	0.197673	0.0739022	0.123771				0.00273484				4.93723e-05
VOC	EUS	-0.0795019	-0.669126	0.123813	0.103838	0.11037	0.0288544	-0.381753	0.28136	-0.282563	-2.37818	0.440052	0.369057	0.392273	0.102553	-1.35681	-1.85164	0.494827				0.0013737				0.00488235
[C]	EUW	-0.0415808	-0.510898	0.245946	0.136038	0.10372	0.0116705	-0.0551043	0.36227	-0.114778	-1.41027	0.678902	0.375515	0.286306	0.0322148	-0.152108	-0.470629	0.318521				0.00709578				0.019587
	CNS	-0.0740553	0.13888	0.197978	0.31024	0.1131	0.0295681	0.715711	0.552548	-0.134025	0.251345	0.3583	0.561472	0.204688	0.0535123	1.29529	1.03709	0.2582				-0.00309967				-0.00560978
	CNW	0.0578208	0.154413	0.36052	0.236669	0.24497	0.0275638	1.08196	0.842324	0.0686444	0.183318	0.428006	0.280971	0.290826	0.0327235	1.28449	0.96094	0.32355				0.00255506				0.00303335
	RWS	-0.178777	-1.83185	0.300689	0.588005	1.34266	0.351016	0.571743	4.07751	-0.0438447	-0.449257	0.0737433	0.144207	0.329284	0.0860859	0.140219	-0.275152	0.41537				0.000745466				0.000182824
	RWW	-0.0582543	-0.607019	0.748323	0.498584	1.73918	0.195691	2.5165	4.16575	-0.0139841	-0.145717	0.179637	0.119686	0.417495	0.0469761	0.604094	0.139623	0.464471				0.000766465				0.000183992
	SHS							0	0.209536	0	0	0	0	0	0	0	0	0				0				0
	SHW							0	0.209536	0	0	0	0	0	0	0	0	0				0				0
	WDS	-0.332334	-2.3621	0.62248	1.00208	1.56613	0.409439	0.905701	4.91142	-0.0676656	-0.48094	0.126741	0.204031	0.318875	0.0833646	0.184407	-0.217833	0.40224				0.000240877				4.90442e-05
	WDW	-0.0420143	-0.963504	1.35479	0.871291	2.08787	0.234925	3.54336	5.37034	-0.00782339	-0.179412	0.252272	0.162241	0.388778	0.0437449	0.659801	0.227278	0.432523				0.000991441				0.000184614
BC	EUS	7.03064	1.12121					8.15185	0.031786	221.187	35.2737	0	0	0	0	256.46	256.46	0				0				0
[C]	EUW	6.40284	0.224134					6.62697	0.047604	134.502	4.7083	0	0	0	0	139.21	139.21	0				0				0
	CNS	21.6371	2.21144					23.8485	0.108732	198.995	20.3384	0	0	0	0	219.333	219.333	0				0				0
	CNW	18.8308	0.727959					19.5588	0.177482	106.1	4.10159	0	0	0	0	110.201	110.201	0				0				0
	RWS	37.2489	3.86876					41.1177	0.342568	108.734	11.2934	0	0	0	0	120.028	120.028	0				0				0
	RWW	35.2422	0.86047					36.1027	0.357486	98.5834	2.407	0	0	0	0	100.99	100.99	0				0				0
	SHS							0	0.012164	0	0	0	0	0	0	0	0	0				0				0
	SHW							0	0.012196	0	0	0	0	0	0	0	0	0				0				0
	WDS	65.9166	7.20141					73.118	0.483086	136.449	14.9071	0	0	0	0	151.356	151.356	0				0				0
	WDW	60.4758	1.81256					62.2884	0.582572	103.808	3.11131	0	0	0	0	106.92	106.92	0				0				0
OC	EUS	-0.227629	-1.60288					-1.83051	0.03996	-5.69642	-40.1121	0	0	0	0	-45.8085	-45.8085	0				0				0
[C]	EUW	-0.0230461	-1.42174					-1.44479	0.0655371	-0.351649	-21.6937	0	0	0	0	-22.0453	-22.0453	0				0				0
OC->C:	CNS	-0.30785	-2.13042					-2.43827	0.211923	-1.45265	-10.0528	0	0	0	0	-11.5055	-11.5055	0				0				0
1.4	CNW	0.0611118	-1.42569					-1.36458	0.367731	0.166186	-3.87699	0	0	0	0	-3.7108	-3.7108	0				0				0
	RWS	-0.474676	-4.94121					-5.41589	0.783989	-0.605463	-6.30266	0	0	0	0	-6.90812	-6.90812	0				0				0
	RWW	0.158691	-2.84704					-2.68835	0.821396	0.193197	-3.4661	0	0	0	0	-3.2729	-3.2729	0				0				0
	SHS							0	0.0127143	0	0	0	0	0	0	0	0	0				0				0
	SHW							0	0.0127471	0	0	0	0	0	0	0	0	0				0				0
	WDS	-1.01016	-8.67451					-9.68466	1.03587	-0.975174	-8.37412	0	0	0	0	-9.34929	-9.34929	0				0				0
	WDW	0.196757	-5.69447					-5.49771	1.25466	0.15682	-4.53864	0	0	0	0	-4.38182	-4.38182	0				0				0
NH3	EUS							0	-999	0	0	0	0	0	0	0	0	0				0				0
	EUW							0	-999	0	0	0	0	0	0	0	0	0				0				0
	CNS							0	-999	0	0	0	0	0	0	0	0	0				0				0
	CNW							0	-999	0	0	0	0	0	0	0	0	0				0				0
	RWS							0	-999	0	0	0	0	0	0	0	0	0				0				0
	RWW							0	-999	0	0	0	0	0	0	0	0	0				0				0
	WDS							0	-999	0	0	0	0	0	0	0	0	0				0				0
	WDW							0	-999	0	0	0	0	0	0	0	0	0				0				0
All	SHS	-0.269573	2.55321	0.809489	0.842315	-4.27817	-1.11846	-1.46119	2.47131	-0.109081	1.03314	0.327555	0.340838	-1.73114	-0.452577	-0.59126	1.59245	-2.18371				0.007586				0.00306963
	SHW	0.148305	-0.366416	0.776104	0.646083	-5.25084	-0.590819	-4.63758	2.47135	0.0600098	-0.148266	0.314041	0.26143	-2.12469	-0.239068	-1.87654	0.487215	-2.36376				-0.000425375				-0.000172123
CH4	Summer	0.122475	5.45992	6.06387	7.1073	50.3806		69.1342	36.5239	0.00335328	0.149489	0.166025	0.194593	1.37939	0	1.89285	0.51346	1.37939				-0.00176529				-4.83324e-05
	Winter	0.0336139	2.45214	2.75549	2.75789	48.9996		56.9987	35.2606	0.0009533	0.0695434	0.0781465	0.0782146	1.38964	0	1.6165	0.226858	1.38964				0				0

## Sheet: HadGEM3
ECLIPSE T4.3 Radiative Forcing Simulations (Absolute RF in mWm-2, Normalised RF in mWm-2 Tg[species]-1)											Perturbation codes: EUS Europe Summer, EUW Europe Winter, CNS China Summer, CNW China Winter, RWS Rest of the World Summer, RWW Rest of the World Winter, SHS Shipping Summer, SHW Shipping Winter, WDS World Summer, WDW World Winter
Model:		HadGEM3									Note: Methane RF is Delta[CH4]_ppb * RF/ppb, increased by 15% to represent stratospheric water changes
		Latitude band 60N-90N									Note: Primary mode ozone RF is DeltaCH4(ppb) * [Ozone RF / DeltaCH4(ppb)]_in_CH4_perturb
	Perturb	ARF	SW+LW O3	CH4	PM O3	Total RF	DeltaEmi	nARF	nSW+LW O3	nCH4	nPM O3	Total nRF	Total SLnRF	Total LLnRF												ADRF NI (from TOT and CTM2 ratio)				nADRF NI
SO2	EUS	26.8732				26.8732	-0.771942	-34.8125	0	0	0	-34.8125	-34.8125	0												-0.602858				0.780963
	EUW	5.08924				5.08924	-0.845543	-6.0189	0	0	0	-6.0189	-6.0189	0												-0.230046				0.272069
	CNS	31.0201				31.0201	-3.14065	-9.87697	0	0	0	-9.87697	-9.87697	0												-0.456607				0.145386
	CNW	4.92384				4.92384	-3.35314	-1.46843	0	0	0	-1.46843	-1.46843	0												-0.0375508				0.0111987
	RWS	99.3008				99.3008	-4.61614	-21.5117	0	0	0	-21.5117	-21.5117	0												-1.1763				0.254823
	RWW	23.588				23.588	-4.68146	-5.0386	0	0	0	-5.0386	-5.0386	0				Cells below are used to compute columns E and F:								-0.474663				0.101392
	SHS					0	-999	0	0	0	0	0	0	0												0				0
	SHW					0	-999	0	0	0	0	0	0	0				Delta[CH4]_ppb		RF/ppb		OzoneRF/DeltaCH4_o3_perturb				0				0
	WDS	157.194				157.194	-8.52873	-18.4311	0	0	0	-18.4311	-18.4311	0												-2.13195				0.249973
	WDW	33.6011				33.6011	-8.88014	-3.78384	0	0	0	-3.78384	-3.78384	0												-0.68572				0.0772195
NOX	EUS	0.72592	-1.47415	0.584898	0.114202	-0.0491303	-0.996201	-0.728688	1.47977	-0.587128	-0.114638	0.0493176	0.751083	-0.701766				1.40112		0.363		0.0825392				0.178072				-0.178751
[NO2]	EUW	-0.253325	-0.395895	0.22707	0.0443357	-0.377814	-1.06187	0.238565	0.372828	-0.21384	-0.0417525	0.355801	0.611393	-0.255592				0.543945		0.363		0.145589				-0.363973				0.342766
	CNS	1.61936	-1.70088	1.26346	0.246692	1.42863	-2.02965	-0.797852	0.838016	-0.622501	-0.121544	-0.70388	0.0401646	-0.744045				3.02661		0.363		0.145589				-0.452276				0.222835
	CNW	3.14846	-0.811279	0.659654	0.128799	3.12563	-2.13188	-1.47685	0.380546	-0.309424	-0.0604155	-1.46614	-1.0963	-0.369839				1.5802		0.363		0.145589				-0.31268				0.146668
	RWS	2.82602	-7.10586	11.3	2.20635	9.22655	-7.17435	-0.393906	0.990453	-1.57506	-0.307533	-1.28605	0.596547	-1.88259				27.0692		0.363		0.145589				0.482171				-0.0672076
	RWW	0.796959	-1.93665	10.8081	2.11029	11.7787	-6.68958	-0.119134	0.289502	-1.61566	-0.31546	-1.76075	0.170368	-1.93112				25.8907		0.363		0.145589				-0.342059				0.0511331
	SHS					0	-999	0	0	0	0	0	0	0												0				0
	SHW					0	-999	0	0	0	0	0	0	0												0				0
	WDS	5.1713	-10.2809	13.1484	2.56724	10.606	-10.2002	-0.50698	1.00791	-1.28903	-0.251686	-1.03979	0.50093	-1.54072												-2.7145				0.266123
	WDW	3.69209	-3.14382	11.6948	2.28343	14.5265	-9.88333	-0.373568	0.318094	-1.18329	-0.231038	-1.4698	-0.0554742	-1.41432												-0.627354				0.063476
CO	EUS	-0.656581	-0.194925	-0.158684	-0.0309833	-1.04117	-2.43213	0.269961	0.0801458	0.0652449	0.0127392	0.428091	0.350107	0.077984				-0.380127		0.363		0.145589				0.0534252				-0.0219664
	EUW	-0.412378	-0.200429	-0.253568	-0.0495096	-0.915885	-3.18188	0.129602	0.0629907	0.0796914	0.0155599	0.287844	0.192593	0.0952512				-0.607422		0.363		0.145589				0.00292786				-0.000920167
	CNS	-1.59186	-0.713803	-0.751276	-0.146688	-3.20363	-13.0988	0.121527	0.0544938	0.0573546	0.0111986	0.244574	0.176021	0.0685532				-1.79968		0.363		0.145589				-0.493448				0.0376712
	CNW	-2.34872	-0.991825	-1.31732	-0.257209	-4.91508	-17.5773	0.133622	0.0564265	0.0749445	0.014633	0.279626	0.190049	0.0895775				-3.15564		0.363		0.145589				0.0771796				-0.00439087
	RWS	-2.96714	-1.60652	-4.09761	-0.800064	-9.47133	-64.3906	0.0460803	0.0249496	0.0636367	0.0124252	0.147092	0.0710299	0.0760619				-9.8158		0.363		0.145589				0.17451				-0.00271018
	RWW	-2.65928	-1.45563	-4.00129	-0.781259	-8.89746	-51.4021	0.0517349	0.0283185	0.077843	0.015199	0.173095	0.0800533	0.0930419				-9.58508		0.363		0.145589				0.0995231				-0.00193617
	SHS					0	-999	0	0	0	0	0	0	0												0				0
	SHW					0	-999	0	0	0	0	0	0	0												0				0
	WDS	-5.21558	-2.51525	-5.00757	-0.977735	-13.7161	-79.9215	0.0652588	0.0314715	0.062656	0.0122337	0.17162	0.0967302	0.0748897												0.682934				-0.00854506
	WDW	-5.42038	-2.64788	-5.57218	-1.08798	-14.7284	-72.1613	0.0751148	0.036694	0.0772184	0.015077	0.204104	0.111809	0.0922955												0.166064				-0.00230129
VOC	EUS	-0.0333053	-0.0607154	-0.0249186	-0.00486539	-0.123805	-0.0563011	0.591557	1.07841	0.442595	0.0864174	2.19897	1.66996	0.529013				-0.0596924		0.363		0.145589				0.000268417				-0.00476753
[C]	EUW	-0.674464	-0.0765084	-0.0233898	-0.00456691	-0.778929	-0.0668507	10.0891	1.14447	0.349882	0.068315	11.6518	11.2336	0.418197				-0.0560303		0.363		0.145589				0.0639991				-0.957344
	CNS	-0.146364	-0.13314	-0.0466776	-0.00911387	-0.335295	-0.145189	1.00809	0.917012	0.321495	0.0627725	2.30937	1.9251	0.384268				-0.111816		0.363		0.145589				-0.0038301				0.0263801
	CNW	-0.162659	-0.19304	-0.0886672	-0.0173124	-0.461679	-0.189049	0.860407	1.02111	0.469017	0.0915763	2.44211	1.88152	0.560593				-0.212402		0.363		0.145589				-0.00240383				0.0127154
	RWS	-0.555762	-0.580824	-0.53975	-0.105387	-1.78172	-1.44339	0.385039	0.402403	0.373946	0.0730136	1.2344	0.787442	0.44696				-1.29297		0.363		0.145589				0.00171623				-0.00118903
	RWW	-0.936443	-0.551597	-0.578632	-0.112979	-2.17965	-1.05804	0.885073	0.521339	0.54689	0.106781	2.06008	1.40641	0.653671				-1.38611		0.363		0.145589				0.0100701				-0.00951769
	SHS					0	-999	0	0	0	0	0	0	0												0				0
	SHW					0	-999	0	0	0	0	0	0	0												0				0
	WDS	-0.735431	-0.774679	-0.611347	-0.119366	-2.24082	-1.64488	0.447103	0.470964	0.371666	0.0725684	1.3623	0.918067	0.444235												0.000359389				-0.00021849
	WDW	-1.77357	-0.821145	-0.690689	-0.134858	-3.42026	-1.31394	1.34981	0.624949	0.525662	0.102636	2.60306	1.97476	0.628299												0.0316365				-0.0240776
BC	EUS	-6.93247				-6.93247	-0.031302	221.471	0	0	0	221.471	221.471	0												0				0
[C]	EUW	-1.33724				-1.33724	-0.048614	27.5073	0	0	0	27.5073	27.5073	0												0				0
	CNS	-5.40144				-5.40144	-0.11036	48.9438	0	0	0	48.9438	48.9438	0												0				0
	CNW	-1.52848				-1.52848	-0.177213	8.6251	0	0	0	8.6251	8.6251	0												0				0
	RWS	-12.3492				-12.3492	-0.31334	39.4115	0	0	0	39.4115	39.4115	0												0				0
	RWW	-9.3447				-9.3447	-0.321528	29.0634	0	0	0	29.0634	29.0634	0												0				0
	SHS					0	-999	0	0	0	0	0	0	0												0				0
	SHW					0	-999	0	0	0	0	0	0	0												0				0
	WDS	-24.6831				-24.6831	-0.455002	54.2484	0	0	0	54.2484	54.2484	0												0				0
	WDW	-12.2104				-12.2104	-0.547355	22.308	0	0	0	22.308	22.308	0												0				0
OC	EUS	1.05915				1.05915	-0.0394859	-26.8235	0	0	0	-26.8235	-26.8235	0												0				0
[C]	EUW	0.4472				0.4472	-0.0689392	-6.48688	0	0	0	-6.48688	-6.48688	0												0				0
OC->C:	CNS	1.16543				1.16543	-0.215149	-5.41685	0	0	0	-5.41685	-5.41685	0												0				0
1.4	CNW	-1.10778				-1.10778	-0.367132	3.01739	0	0	0	3.01739	3.01739	0												0				0
	RWS	-0.383196				-0.383196	-0.743451	0.515429	0	0	0	0.515429	0.515429	0												0				0
	RWW	0.648789				0.648789	-0.76317	-0.850124	0	0	0	-0.850124	-0.850124	0												0				0
	SHS					0	-999	0	0	0	0	0	0	0												0				0
	SHW					0	-999	0	0	0	0	0	0	0												0				0
	WDS	1.84138				1.84138	-0.998086	-1.84492	0	0	0	-1.84492	-1.84492	0												0				0
	WDW	-0.011791				-0.011791	-1.19924	0.00983205	0	0	0	0.00983205	0.00983205	0												0				0
NH3	EUS					0	-999	0	0	0	0	0	0	0												0				0
	EUW					0	-999	0	0	0	0	0	0	0												0				0
	CNS					0	-999	0	0	0	0	0	0	0												0				0
	CNW					0	-999	0	0	0	0	0	0	0												0				0
	RWS					0	-999	0	0	0	0	0	0	0												0				0
	RWW					0	-999	0	0	0	0	0	0	0												0				0
	WDS					0	-999	0	0	0	0	0	0	0												0				0
	WDW					0	-999	0	0	0	0	0	0	0												0				0
All	SHS	3.29268	-2.4473	4.03202	0.787258	5.66466	-2.81	-1.17177	0.870925	-1.43488	-0.280163	-2.01589	-0.300847	-1.71505				9.65869		0.363		0.145589				0.0130969				-0.00466083
	SHW	2.40675	-1.6656	5.03411	0.982919	6.75818	-2.81	-0.856495	0.59274	-1.7915	-0.349793	-2.40505	-0.263754	-2.14129				12.0592		0.363		0.145589				-0.0072509				0.00258039
CH4	Annual	-23.7776	-27.5681	-141.193		-192.538	-117.113	0.203032	0.235398	1.20561	0	1.64404	0.438429	1.20561												0.342718				-0.00292639
	N/A					0	-999	0	0	0	0	0	0	0												0				0

## Sheet: ECHAM6
ECLIPSE T4.3 Radiative Forcing Simulations (Absolute RF in mWm-2, Normalised RF in mWm-2 Tg[species]-1)											Perturbation codes: EUS Europe Summer, EUW Europe Winter, CNS China Summer, CNW China Winter, RWS Rest of the World Summer, RWW Rest of the World Winter, SHS Shipping Summer, SHW Shipping Winter, WDS World Summer, WDW World Winter
Model:		ECHAM6-HAMMOZ
		Latitude band 60N-90N
	Perturb	ADRF	AIRF	Total RF	DeltaEmi	nADRF	nAIRF	Total nRF	Total SLnRF	Total LLnRF							ADRF NI (from TOT and CTM2 ratio)				nADRF NI
SO2	EUS	-1.04727		-1.04727	0.754654	-1.38775	0	-1.38775	-1.38775	0							0.0384512				0.0509522
	EUW	-0.183156		-0.183156	0.822845	-0.222589	0	-0.222589	-0.222589	0							0.00852476				0.0103601
	CNS	-1.16801		-1.16801	3.07068	-0.380375	0	-0.380375	-0.380375	0							0.0188465				0.00613757
	CNW	-0.434745		-0.434745	3.26286	-0.13324	0	-0.13324	-0.13324	0							0.00335508				0.00102826
	RWS	-3.53028		-3.53028	4.97903	-0.70903	0	-0.70903	-0.70903	0							0.0622238				0.0124972
	RWW	-1.16008		-1.16008	5.02554	-0.230837	0	-0.230837	-0.230837	0							0.0236819				0.00471232
	SHS				1.24748												0				0
	SHW				1.23947												0				0
	WDS	-5.74556		-5.74556	8.80436	-0.652581	0	-0.652581	-0.652581	0							0.113751				0.0129199
	WDW	-1.77798		-1.77798	9.11125	-0.195141	0	-0.195141	-0.195141	0							0.0369162				0.00405172
NOX	EUS
[NO2]	EUW
	CNS
	CNW
	RWS
	RWW
	SHS
	SHW
	WDS
	WDW
CO	EUS
	EUW
	CNS
	CNW
	RWS
	RWW
	SHS
	SHW
	WDS
	WDW
VOC	EUS
[C]	EUW
	CNS
	CNW
	RWS
	RWW
	SHS
	SHW
	WDS
	WDW
BC	EUS	0.509909		0.509909	0.03122	16.3328	0	16.3328	16.3328	0
[C]	EUW	0.206988		0.206988	0.0485559	4.26288	0	4.26288	4.26288	0
	CNS	0.240981		0.240981	0.110691	2.17706	0	2.17706	2.17706	0
	CNW	0.235589		0.235589	0.177134	1.33	0	1.33	1.33	0
	RWS	1.96594		1.96594	0.3494	5.62662	0	5.62662	5.62662	0
	RWW	1.38426		1.38426	0.358214	3.86434	0	3.86434	3.86434	0
	SHS				0.0147238
	SHW				0.0146251
	WDS	2.71683		2.71683	0.491311	5.52976	0	5.52976	5.52976	0
	WDW	1.82684		1.82684	0.583904	3.12866	0	3.12866	3.12866	0
OC	EUS	-0.0151101		-0.0151101	0.0373764	-0.404268	0	-0.404268	-0.404268	0
[C]	EUW	0.00251931		0.00251931	0.0686226	0.0367125	0	0.0367125	0.0367125	0
OC->C:	CNS	0.00880283		0.00880283	0.215786	0.0407943	0	0.0407943	0.0407943	0
1.4	CNW	0.0120491		0.0120491	0.367085	0.0328237	0	0.0328237	0.0328237	0
	RWS	0.012994		0.012994	0.801567	0.0162107	0	0.0162107	0.0162107	0
	RWW	0.0487246		0.0487246	0.822269	0.0592563	0	0.0592563	0.0592563	0
	SHS				0.0156937
	SHW				0.0156975
	WDS	0.00668673		0.00668673	1.05473	0.00633976	0	0.00633976	0.00633976	0
	WDW	0.063293		0.063293	1.25798	0.0503133	0	0.0503133	0.0503133	0
NH3	EUS
	EUW
	CNS
	CNW
	RWS
	RWW
	WDS
	WDW
All	SHS	-0.343277		-0.343277	1.2779	-0.268626	0	-0.268626	-0.268626	0
	SHW	-0.0952048		-0.0952048	1.26979	-0.0749767	0	-0.0749767	-0.0749767	0
CH4	Summer
	Winter

## Sheet: Methane
Model	tau_OH_Control(yr)	tau_OH_perturb(yr)	tau_CH4_control(yr)	tau_CH4_perturb(yr)	Burden_Control(Tg[CH4])	Burden_Perturb(Tg[CH4])	DeltaBurden(Tg[CH4])	s	f	DeltaEmiss(Tg[CH4]/yr)	CH4_VMR_control(ppbv)	CH4_VMR_perturb(ppbv)	RF_CH4(Wm-2)	NRF_CH4(mWm-2/Tg[CH4])	NRF_SWV(mWm-2/Tg[CH4])	RF_Ozone(mWm-2)	NRF_Ozone(mWm-2/Tg[CH4]/yr)	NRF_O3/NRF_CH4
OsloCTM2	10.2429	9.61573	8.91171	8.43316	4909.33	4115.04	794.299	0.312737	1.45505	61.2556	1728.18	1448.57	0.108517	1.77155	0.265732	19.2828	0.314793	0.177694
HadGEM3	5.96	5.63	5.4834	5.20283	4560.8	3702.4	858.4	0.251891	1.3367	117.113	1605.49	1303.32	0.122776	1.04836	0.157254	27.5681	0.235398	0.224539
NorESM(S)	7.8	7.67	7.00337	6.89839	4814.81	4488.79	326.02	0.215415	1.27456	36.5239	1694.91	1580.14	0.0438092	1.19947	0.17992	13.1712	0.360618	0.300648
NorESM(W)	7.8	7.67	7.00337	6.89839	4814.81	4497.57	317.24	0.22159	1.28467	35.2606	1694.91	1583.23	0.0426083	1.20838	0.181258	5.51338	0.156361	0.129397
													Formula in Table 3 of Myhre et al. (1998)		Stratospheric water vapour contribution (extra 15% Myhre et al., 2007)
tau_strat	120	yr
tau_soil	160	yr
Matm	5130000	Tg (assumes methane is well mixed throughout the atmosphere)
m_dry_air	28.966
m_methane	16.04
factor	0.35202	Conversion burden (Tg) to vmr (ppbv)
C0	1788	Reference methane mass-mixing ratio (ppb) (WMO Ozone Assessment Report)
N2O_mmr	325	pbb (WMO, 2014)

## Sheet: Best(OsloNitr)
# Best estimates of ECLIPSE T4.3 Radiative Forcing Simulations (Normalised RF in mWm-2 Tg[species]-1)														Best estimates are given for each main process.					Perturbation codes: EUS Europe Summer, EUW Europe Winter, CNS China Summer, CNW China Winter, RWS Rest of the World Summer, RWW Rest of the World Winter, SHS Shipping Summer, SHW Shipping Winter, WDS World Summer, WDW World Winter
#			Latitude band 60N-90N											Nitrate RF is directly taken from OsloCTM2 and added to NorESM, HadGEM3, and ECHAM6.											Note: Best/low/high estimates of total nRF are sums of component best/low/high estimates, not averages of modelled nRF.
# Model:			OsloCTM2							NorESM					HadGEM3					ECHAM6		Include in	Best							Low							High
Species	Units	Perturb	AD+IRF	BC_SNOW	BC_SEMID	Ozone	Methane	PM Ozone	Total nRF	AD+IRF	Ozone	Methane	PM Ozone	Total nRF	AD+IRF	Ozone	Methane	PM Ozone	Total nRF	AD+IRF	Total nRF		AD+IRF	BC_SNOW	BC_SEMID	Ozone	Methane	PM Ozone	Total nRF	AD+IRF	BC_SNOW	BC_SEMID	Ozone	Methane	PM Ozone	Total nRF	AD+IRF	BC_SNOW	BC_SEMID	Ozone	Methane	PM Ozone	Total nRF
SO2	SO2	EUS	-5.55924	0		0	0	0	-5.55924	-18.2054	0	0	0	-18.2054	-34.6849	0	0	0	-34.6849	-1.26017	-1.26017	O,N,H	-19.4832	0	0	0	0	0	-19.4832	-34.6849	0	0	0	0	0	-34.6849	-5.55924	0	0	0	0	0	-5.55924
SO2	SO2	EUW	-1.54773	0		0	0	0	-1.54773	-6.29973	0	0	0	-6.29973	-5.94563	0	0	0	-5.94563	-0.149315	-0.149315	O,N,H	-4.5977	0	0	0	0	0	-4.5977	-6.29973	0	0	0	0	0	-6.29973	-1.54773	0	0	0	0	0	-1.54773
SO2	SO2	CNS	-1.71873	0		0	0	0	-1.71873	-7.83565	0	0	0	-7.83565	-9.85129	0	0	0	-9.85129	-0.354698	-0.354698	O,N,H	-6.46856	0	0	0	0	0	-6.46856	-9.85129	0	0	0	0	0	-9.85129	-1.71873	0	0	0	0	0	-1.71873
SO2	SO2	CNW	-0.622238	0		0	0	0	-0.622238	-3.08478	0	0	0	-3.08478	-1.46364	0	0	0	-1.46364	-0.128459	-0.128459	O,N,H	-1.72355	0	0	0	0	0	-1.72355	-3.08478	0	0	0	0	0	-3.08478	-0.622238	0	0	0	0	0	-0.622238
SO2	SO2	RWS	-3.39864	0		0	0	0	-3.39864	-12.0043	0	0	0	-12.0043	-21.4709	0	0	0	-21.4709	-0.668287	-0.668287	O,N,H	-12.2913	0	0	0	0	0	-12.2913	-21.4709	0	0	0	0	0	-21.4709	-3.39864	0	0	0	0	0	-3.39864
SO2	SO2	RWW	-0.953783	0		0	0	0	-0.953783	-3.53255	0	0	0	-3.53255	-5.01901	0	0	0	-5.01901	-0.21125	-0.21125	O,N,H	-3.16845	0	0	0	0	0	-3.16845	-5.01901	0	0	0	0	0	-5.01901	-0.953783	0	0	0	0	0	-0.953783
SO2	SO2	SHS	-2.48767	0		0	0	0	-2.48767	0	0	0	0	0	0	0	0	0	0	0	0
SO2	SO2	SHW	-0.600693	0		0	0	0	-0.600693	0	0	0	0	0	0	0	0	0	0	0	0
SO2	SO2	WDS	-2.94558	0		0	0	0	-2.94558	-11.0849	0	0	0	-11.0849	-18.3906	0	0	0	-18.3906	-0.612082	-0.612082	O,N,H	-10.807	0	0	0	0	0	-10.807	-18.3906	0	0	0	0	0	-18.3906	-2.94558	0	0	0	0	0	-2.94558
SO2	SO2	WDW	-0.859786	0		0	0	0	-0.859786	-3.62315	0	0	0	-3.62315	-3.76593	0	0	0	-3.76593	-0.17723	-0.17723	O,N,H	-2.74962	0	0	0	0	0	-2.74962	-3.76593	0	0	0	0	0	-3.76593	-0.859786	0	0	0	0	0	-0.859786
NOX	NO2	EUS	-0.209612	0		1.60433	-0.859775	-0.132849	0.40209	-0.251915	1.95615	-0.88733	-0.231978	0.584927	-0.769979	1.47977	-0.587128	-0.114638	0.00802736	0	0	O,N,H	-0.410502	0	0	1.68008	-0.778078	-0.159822	0.331681	-0.769979	0	0	1.47977	-0.88733	-0.231978	-0.409515	-0.209612	0	0	1.95615	-0.587128	-0.114638	1.04477
NOX	NO2	EUW	-0.047542	0		0.640401	-0.408163	-0.0630679	0.121628	-0.283519	0.535427	-0.302979	-0.0340909	-0.0851621	0.210533	0.372828	-0.21384	-0.0417525	0.327769	0	0	O,N,H	-0.0401761	0	0	0.516219	-0.308327	-0.0463038	0.121412	-0.283519	0	0	0.372828	-0.408163	-0.0630679	-0.381922	0.210533	0	0	0.640401	-0.21384	-0.0340909	0.603004
NOX	NO2	CNS	0.0107654	0		0.956598	-0.879881	-0.135956	-0.0484739	-0.497685	1.16579	-0.881059	-0.230338	-0.44329	-0.802024	0.838016	-0.622501	-0.121544	-0.708052	0	0	O,N,H	-0.429648	0	0	0.986802	-0.79448	-0.162613	-0.399939	-0.802024	0	0	0.838016	-0.881059	-0.230338	-1.07541	0.0107654	0	0	1.16579	-0.622501	-0.121544	0.432513
NOX	NO2	CNW	0.0149054	0		0.581112	-0.566219	-0.08749	-0.0576912	-0.279721	0.368727	-0.455324	-0.0512326	-0.417551	-1.47849	0.380546	-0.309424	-0.0604155	-1.46778	0	0	O,N,H	-0.581102	0	0	0.443462	-0.443656	-0.0663794	-0.647675	-1.47849	0	0	0.368727	-0.566219	-0.08749	-1.76347	0.0149054	0	0	0.581112	-0.309424	-0.0512326	0.235361
NOX	NO2	RWS	-0.0796622	0		1.17368	-1.79487	-0.277337	-0.978193	-0.19805	1.35385	-2.0976	-0.548381	-1.49018	-0.405517	0.990453	-1.57506	-0.307533	-1.29766	0	0	O,N,H	-0.227743	0	0	1.17266	-1.82251	-0.37775	-1.25534	-0.405517	0	0	0.990453	-2.0976	-0.548381	-2.06104	-0.0796622	0	0	1.35385	-1.57506	-0.277337	-0.578213
NOX	NO2	RWW	0.00871531	0		0.611974	-1.84848	-0.28562	-1.51341	-0.10939	0.424296	-2.17594	-0.244834	-2.10587	-0.125688	0.289502	-1.61566	-0.31546	-1.7673	0	0	O,N,H	-0.0754542	0	0	0.441924	-1.88002	-0.281971	-1.79553	-0.125688	0	0	0.289502	-2.17594	-0.31546	-2.32758	0.00871531	0	0	0.611974	-1.61566	-0.244834	-1.2398
NOX	NO2	SHS	0.48579	0		1.61653	-3.38053	-0.522347	-1.80056	0	0	0	0	0	0	0	0	0	0	0	0
NOX	NO2	SHW	0.21855	0		1.15623	-4.17516	-0.645131	-3.44552	0	0	0	0	0	0	0	0	0	0	0	0
NOX	NO2	WDS	0.0121234	0		1.23993	-1.78791	-0.276261	-0.81212	-0.269217	1.37753	-1.70323	-0.445281	-1.0402	-0.520375	1.00791	-1.28903	-0.251686	-1.05318	0	0	O,N,H	-0.259156	0	0	1.20846	-1.59339	-0.324409	-0.968501	-0.520375	0	0	1.00791	-1.78791	-0.445281	-1.74566	0.0121234	0	0	1.37753	-1.28903	-0.251686	-0.151069
NOX	NO2	WDW	0.0360717	0		0.690255	-1.82373	-0.281796	-1.3792	-0.165946	0.424355	-1.58722	-0.178592	-1.5074	-0.380952	0.318094	-1.18329	-0.231038	-1.47718	0	0	O,N,H	-0.170275	0	0	0.477568	-1.53141	-0.230476	-1.45459	-0.380952	0	0	0.318094	-1.82373	-0.281796	-2.16838	0.0360717	0	0	0.690255	-1.18329	-0.178592	-0.635551
CO	CO	EUS	-0.00209112	0		0.0545822	0.123509	0.0190842	0.195085	0.0547885	0.0422526	0.094844	0.0247954	0.216681	0.270147	0.0801458	0.0652449	0.0127392	0.428276	0	0	O,N,H	0.107615	0	0	0.0589935	0.0945327	0.0188729	0.280014	-0.00209112	0	0	0.0422526	0.0652449	0.0127392	0.118146	0.270147	0	0	0.0801458	0.123509	0.0247954	0.498597
CO	CO	EUW	-0.00433438	0		0.0473094	0.149012	0.0230248	0.215012	0.0912823	0.0421923	0.112342	0.0126407	0.258458	0.129633	0.0629907	0.0796914	0.0155599	0.287875	0	0	O,N,H	0.0721936	0	0	0.0508308	0.113682	0.0170751	0.253781	-0.00433438	0	0	0.0421923	0.0796914	0.0126407	0.13019	0.129633	0	0	0.0629907	0.149012	0.0230248	0.364661
CO	CO	CNS	0.000796889	0		0.0477355	0.122427	0.0189169	0.189876	0.0684384	0.0497203	0.0875882	0.0228985	0.228645	0.121716	0.0544938	0.0573546	0.0111986	0.244763	0	0	O,N,H	0.0636503	0	0	0.0506499	0.0891232	0.0176713	0.221095	0.000796889	0	0	0.0477355	0.0573546	0.0111986	0.117086	0.121716	0	0	0.0544938	0.122427	0.0228985	0.321535
CO	CO	CNW	-0.00159205	0		0.0391282	0.147725	0.022826	0.208087	0.062331	0.0329282	0.110868	0.0124747	0.218602	0.133676	0.0564265	0.0749445	0.014633	0.27968	0	0	O,N,H	0.0648051	0	0	0.0428276	0.111179	0.0166446	0.235457	-0.00159205	0	0	0.0329282	0.0749445	0.0124747	0.118755	0.133676	0	0	0.0564265	0.147725	0.022826	0.360654
CO	CO	RWS	-0.00118231	0		0.0286088	0.12957	0.0200207	0.177017	0.0174916	0.0274988	0.0935277	0.0244512	0.162969	0.0461542	0.0249496	0.0636367	0.0124252	0.147166	0	0	O,N,H	0.0208211	0	0	0.0270191	0.0955781	0.0189657	0.162384	-0.00118231	0	0	0.0249496	0.0636367	0.0124252	0.0998292	0.0461542	0	0	0.0286088	0.12957	0.0244512	0.228784
CO	CO	RWW	-0.0010302	0		0.0284927	0.149568	0.0231108	0.200142	0.0327864	0.0255216	0.111343	0.0125283	0.18218	0.0517749	0.0283185	0.077843	0.015199	0.173135	0	0	O,N,H	0.0278437	0	0	0.0274443	0.112918	0.016946	0.185152	-0.0010302	0	0	0.0255216	0.077843	0.0125283	0.114863	0.0517749	0	0	0.0284927	0.149568	0.0231108	0.252947
CO	CO	SHS	0.00471562	0		-0.00865439	0.0869565	0.0134362	0.0964539	0	0	0	0	0	0	0	0	0	0	0	0
CO	CO	SHW	0.00759473	0		0.0409696	0.176991	0.027348	0.252903	0	0	0	0	0	0	0	0	0	0	0	0
CO	CO	WDS	-0.00071932	0		0.0347084	0.127462	0.019695	0.181146	0.0324797	0.0339616	0.0920603	0.0240676	0.182569	0.0653672	0.0314715	0.062656	0.0122337	0.171728	0	0	O,N,H	0.0323758	0	0	0.0333805	0.0940595	0.0186654	0.178481	-0.00071932	0	0	0.0314715	0.062656	0.0122337	0.105642	0.0653672	0	0	0.0347084	0.127462	0.0240676	0.251605
CO	CO	WDW	-0.00138806	0		0.0328204	0.14897	0.0230182	0.20342	0.0452	0.0287461	0.111253	0.012518	0.197717	0.0751586	0.036694	0.0772184	0.015077	0.204148	0	0	O,N,H	0.0396568	0	0	0.0327535	0.11248	0.0168711	0.201762	-0.00138806	0	0	0.0287461	0.0772184	0.012518	0.117095	0.0751586	0	0	0.036694	0.14897	0.0230182	0.283841
VOC	C	EUS	-0.859186	0		1.96968	0.64862	0.100222	1.85934	-2.65377	0.809109	0.392273	0.102553	-1.34983	0.598538	1.07841	0.442595	0.0864174	2.20596	0	0	O,N,H	-0.971472	0	0	1.28573	0.494496	0.0963977	0.905155	-2.65377	0	0	0.809109	0.392273	0.0864174	-1.36597	0.598538	0	0	1.96968	0.64862	0.102553	3.31939
VOC	C	EUW	-0.179373	0		2.2351	0.168278	0.0260017	2.25001	-1.50624	1.05442	0.286306	0.0322148	-0.133304	10.1079	1.14447	0.349882	0.068315	11.6706	0	0	O,N,H	2.80743	0	0	1.478	0.268155	0.0421772	4.59576	-1.50624	0	0	1.05442	0.168278	0.0260017	-0.257545	10.1079	0	0	2.2351	0.349882	0.068315	12.7612
VOC	C	CNS	-0.225405	0		1.37022	0.29883	0.0461741	1.48982	0.111572	0.919772	0.204688	0.0535123	1.28954	1.00234	0.917012	0.321495	0.0627725	2.30362	0	0	O,N,H	0.29617	0	0	1.069	0.275005	0.054153	1.69433	-0.225405	0	0	0.917012	0.204688	0.0461741	0.942469	1.00234	0	0	1.37022	0.321495	0.0627725	2.75683
VOC	C	CNW	-0.0503311	0		1.28836	0.0158441	0.00244817	1.25632	0.251229	0.708978	0.290826	0.0327235	1.28376	0.859674	1.02111	0.469017	0.0915763	2.44138	0	0	O,N,H	0.353524	0	0	1.00615	0.258563	0.0422493	1.66049	-0.0503311	0	0	0.708978	0.0158441	0.00244817	0.676939	0.859674	0	0	1.28836	0.469017	0.0915763	2.70863
VOC	C	RWS	-0.291086	0		0.64172	0.775393	0.119811	1.24584	-0.4922	0.21795	0.329284	0.0860859	0.14112	0.385941	0.402403	0.373946	0.0730136	1.2353	0	0	O,N,H	-0.132448	0	0	0.420691	0.492874	0.0929701	0.874087	-0.4922	0	0	0.21795	0.329284	0.0730136	0.128048	0.385941	0	0	0.64172	0.775393	0.119811	1.92286
VOC	C	RWW	-0.169064	0		0.798117	0.742584	0.114741	1.48638	-0.157863	0.299324	0.417495	0.0469761	0.605932	0.886911	0.521339	0.54689	0.106781	2.06192	0	0	O,N,H	0.186661	0	0	0.539593	0.56899	0.0894995	1.38474	-0.169064	0	0	0.299324	0.417495	0.0469761	0.59473	0.886911	0	0	0.798117	0.742584	0.114741	2.54235
VOC	C	SHS	-0.0245466	0		-0.0256898	1.23252	0.190444	1.37273	0	0	0	0	0	0	0	0	0	0	0	0
VOC	C	SHW	0.0777726	0		0.152601	0.975682	0.150759	1.35681	0	0	0	0	0	0	0	0	0	0	0	0
VOC	C	WDS	-0.319537	0		0.863944	0.682322	0.10543	1.33216	-0.548449	0.330773	0.318875	0.0833646	0.184564	0.44726	0.470964	0.371666	0.0725684	1.36246	0	0	O,N,H	-0.140242	0	0	0.555227	0.457621	0.087121	0.959727	-0.548449	0	0	0.330773	0.318875	0.0725684	0.173767	0.44726	0	0	0.863944	0.682322	0.10543	2.09895
VOC	C	WDW	-0.145089	0		1.01343	0.545727	0.0843237	1.49839	-0.1846	0.414513	0.388778	0.0437449	0.662436	1.35244	0.624949	0.525662	0.102636	2.60569	0	0	O,N,H	0.340918	0	0	0.684297	0.486722	0.0769017	1.58884	-0.1846	0	0	0.414513	0.388778	0.0437449	0.662436	1.35244	0	0	1.01343	0.545727	0.102636	3.01423
BC	C	EUS	127.211	30.0337	-59.4746	0	0	0	97.7699	256.46	0	0	0	256.46	221.471	0	0	0	221.471	16.3328	16.3328	O,N,H	201.714	30.0337	-59.4746	0	0	0	172.273	127.211	30.0337	-59.4746	0	0	0	97.7699	256.46	30.0337	-59.4746	0	0	0	227.02
BC	C	EUW	62.6903	210.298	-5.82909	0	0	0	267.159	139.21	0	0	0	139.21	27.5073	0	0	0	27.5073	4.26288	4.26288	O,N,H	76.4693	210.298	-5.82909	0	0	0	280.938	27.5073	210.298	-5.82909	0	0	0	231.976	139.21	210.298	-5.82909	0	0	0	343.679
BC	C	CNS	62.016	11.6073	-35.9585	0	0	0	37.6648	219.333	0	0	0	219.333	48.9438	0	0	0	48.9438	2.17706	2.17706	O,N,H	110.098	11.6073	-35.9585	0	0	0	85.7464	48.9438	11.6073	-35.9585	0	0	0	24.5926	219.333	11.6073	-35.9585	0	0	0	194.982
BC	C	CNW	22.2233	45.0084	0.862644	0	0	0	68.0944	110.201	0	0	0	110.201	8.6251	0	0	0	8.6251	1.33	1.33	O,N,H	47.0166	45.0084	0.862644	0	0	0	92.8877	8.6251	45.0084	0.862644	0	0	0	54.4962	110.201	45.0084	0.862644	0	0	0	156.072
BC	C	RWS	52.0694	11.5758	-27.9759	0	0	0	35.6693	120.028	0	0	0	120.028	39.4115	0	0	0	39.4115	5.62662	5.62662	O,N,H	70.5029	11.5758	-27.9759	0	0	0	54.1027	39.4115	11.5758	-27.9759	0	0	0	23.0114	120.028	11.5758	-27.9759	0	0	0	103.628
BC	C	RWW	41.9016	69.3774	-15.3025	0	0	0	95.9766	100.99	0	0	0	100.99	29.0634	0	0	0	29.0634	3.86434	3.86434	O,N,H	57.3185	69.3774	-15.3025	0	0	0	111.393	29.0634	69.3774	-15.3025	0	0	0	83.1384	100.99	69.3774	-15.3025	0	0	0	155.065
BC	C	SHS	50.202	25.038	-20.4361	0	0	0	54.804	0	0	0	0	0	0	0	0	0	0	0	0				-20.4361							-20.4361							-20.4361
BC	C	SHW	36.7745	118.773	-8.36958	0	0	0	147.178	0	0	0	0	0	0	0	0	0	0	0	0				-8.36958							-8.36958							-8.36958
BC	C	WDS	58.6816	13.0047	-31.7493	0	0	0	39.937	151.356	0	0	0	151.356	54.2484	0	0	0	54.2484	5.52976	5.52976	O,N,H	88.0954	13.0047	-31.7493	0	0	0	69.3508	54.2484	13.0047	-31.7493	0	0	0	35.5037	151.356	13.0047	-31.7493	0	0	0	132.612
BC	C	WDW	37.5865	74.2559	-11.1333	0	0	0	100.709	106.92	0	0	0	106.92	22.308	0	0	0	22.308	3.12866	3.12866	O,N,H	55.6047	74.2559	-11.1333	0	0	0	118.727	22.308	74.2559	-11.1333	0	0	0	85.4307	106.92	74.2559	-11.1333	0	0	0	170.042
OC	C	EUS	-7.96614	0		0	0	0	-7.96614	-45.8085	0	0	0	-45.8085	-26.8235	0	0	0	-26.8235	-0.404268	-0.404268	O,N,H	-26.8661	0	0	0	0	0	-26.8661	-45.8085	0	0	0	0	0	-45.8085	-7.96614	0	0	0	0	0	-7.96614
OC	C	EUW	-1.48464	0		0	0	0	-1.48464	-22.0453	0	0	0	-22.0453	-6.48688	0	0	0	-6.48688	0.0367125	0.0367125	O,N,H	-10.0056	0	0	0	0	0	-10.0056	-22.0453	0	0	0	0	0	-22.0453	-1.48464	0	0	0	0	0	-1.48464
OC	C	CNS	-0.767351	0		0	0	0	-0.767351	-11.5055	0	0	0	-11.5055	-5.41685	0	0	0	-5.41685	0.0407943	0.0407943	O,N,H	-5.89655	0	0	0	0	0	-5.89655	-11.5055	0	0	0	0	0	-11.5055	-0.767351	0	0	0	0	0	-0.767351
OC	C	CNW	-0.141464	0		0	0	0	-0.141464	-3.7108	0	0	0	-3.7108	3.01739	0	0	0	3.01739	0.0328237	0.0328237	O,N,H	-0.278292	0	0	0	0	0	-0.278292	-3.7108	0	0	0	0	0	-3.7108	3.01739	0	0	0	0	0	3.01739
OC	C	RWS	-0.692164	0		0	0	0	-0.692164	-6.90812	0	0	0	-6.90812	0.515429	0	0	0	0.515429	0.0162107	0.0162107	O,N,H	-2.36162	0	0	0	0	0	-2.36162	-6.90812	0	0	0	0	0	-6.90812	0.515429	0	0	0	0	0	0.515429
OC	C	RWW	-0.179804	0		0	0	0	-0.179804	-3.2729	0	0	0	-3.2729	-0.850124	0	0	0	-0.850124	0.0592563	0.0592563	O,N,H	-1.43428	0	0	0	0	0	-1.43428	-3.2729	0	0	0	0	0	-3.2729	-0.179804	0	0	0	0	0	-0.179804
OC	C	SHS	-1.45786	0		0	0	0	-1.45786	0	0	0	0	0	0	0	0	0	0	0	0
OC	C	SHW	-0.479315	0		0	0	0	-0.479315	0	0	0	0	0	0	0	0	0	0	0	0
OC	C	WDS	-0.962892	0		0	0	0	-0.962892	-9.34929	0	0	0	-9.34929	-1.84492	0	0	0	-1.84492	0.00633976	0.00633976	O,N,H	-4.05237	0	0	0	0	0	-4.05237	-9.34929	0	0	0	0	0	-9.34929	-0.962892	0	0	0	0	0	-0.962892
OC	C	WDW	-0.238144	0		0	0	0	-0.238144	-4.38182	0	0	0	-4.38182	0.00983205	0	0	0	0.00983205	0.0503133	0.0503133	O,N,H	-1.53671	0	0	0	0	0	-1.53671	-4.38182	0	0	0	0	0	-4.38182	0.00983205	0	0	0	0	0	0.00983205
NH3	NH3	EUS	-0.496082	0		0	0	0	-0.496082	0	0	0	0	0	0	0	0	0	0	0	0	O	-0.496082	0	0	0	0	0	-0.496082	-0.496082	0	0	0	0	0	-0.496082	-0.496082	0	0	0	0	0	-0.496082
NH3	NH3	EUW	-0.286429	0		0	0	0	-0.286429	0	0	0	0	0	0	0	0	0	0	0	0	O	-0.286429	0	0	0	0	0	-0.286429	-0.286429	0	0	0	0	0	-0.286429	-0.286429	0	0	0	0	0	-0.286429
NH3	NH3	CNS	-0.0274763	0		0	0	0	-0.0274763	0	0	0	0	0	0	0	0	0	0	0	0	O	-0.0274763	0	0	0	0	0	-0.0274763	-0.0274763	0	0	0	0	0	-0.0274763	-0.0274763	0	0	0	0	0	-0.0274763
NH3	NH3	CNW	-0.0186174	0		0	0	0	-0.0186174	0	0	0	0	0	0	0	0	0	0	0	0	O	-0.0186174	0	0	0	0	0	-0.0186174	-0.0186174	0	0	0	0	0	-0.0186174	-0.0186174	0	0	0	0	0	-0.0186174
NH3	NH3	RWS	-0.0371294	0		0	0	0	-0.0371294	0	0	0	0	0	0	0	0	0	0	0	0	O	-0.0371294	0	0	0	0	0	-0.0371294	-0.0371294	0	0	0	0	0	-0.0371294	-0.0371294	0	0	0	0	0	-0.0371294
NH3	NH3	RWW	-0.0325239	0		0	0	0	-0.0325239	0	0	0	0	0	0	0	0	0	0	0	0	O	-0.0325239	0	0	0	0	0	-0.0325239	-0.0325239	0	0	0	0	0	-0.0325239	-0.0325239	0	0	0	0	0	-0.0325239
NH3	NH3	WDS	-0.0686344	0		0	0	0	-0.0686344	0	0	0	0	0	0	0	0	0	0	0	0	O	-0.0686344	0	0	0	0	0	-0.0686344	-0.0686344	0	0	0	0	0	-0.0686344	-0.0686344	0	0	0	0	0	-0.0686344
NH3	NH3	WDW	-0.0477752	0		0	0	0	-0.0477752	0	0	0	0	0	0	0	0	0	0	0	0	O	-0.0477752	0	0	0	0	0	-0.0477752	-0.0477752	0	0	0	0	0	-0.0477752	-0.0477752	0	0	0	0	0	-0.0477752
Ship_All	Multiple	SHS	-0.406441	0.300456	-0.0829602	0.925954	-1.89106	-0.292199	-1.44625	0.92245	0.668393	-1.73114	-0.452577	-0.59287	-1.17338	0.870925	-1.43488	-0.280163	-2.0175	-0.270237	-0.270237	O,N,H	-0.219124	0.300456	-0.0829602	0.821757	-1.68569	-0.341646	-1.20721	-1.17338	0.300456	-0.0829602	0.668393	-1.89106	-0.452577	-2.63113	0.92245	0.300456	-0.0829602	0.925954	-1.43488	-0.280163	0.350853
Ship_All	Multiple	SHW	0.0641422	1.42528	-0.0345405	0.668218	-2.34546	-0.362412	-0.584773	-0.0884498	0.575471	-2.12469	-0.239068	-1.87674	-0.856688	0.59274	-1.7915	-0.349793	-2.40524	-0.0751705	-0.0751705	O,N,H	-0.293665	1.42528	-0.0345405	0.612143	-2.08722	-0.317091	-0.69509	-0.856688	1.42528	-0.0345405	0.575471	-2.34546	-0.362412	-1.59835	0.0641422	1.42528	-0.0345405	0.668218	-1.7915	-0.239068	0.0925324
CH4	CH4	Summer	-0.0253333	0		0.314793	2.03728	0	2.32674	0.153213	0.360618	1.37939	0	1.89322	0.203402	0.235398	1.20561	0	1.64441	0	0	O,N,H	0.100537	0	0	0.266792	1.50298	0	1.87031	-0.0253333	0	0	0.156361	1.20561	0	1.33664	0.203402	0	0	0.360618	2.03728	0	2.6013
CH4	CH4	Winter	0	0		0	0	0	0	0.0708672	0.156361	1.38964	0	1.61687	0	0	0	0	0	0	0			0	0						0	0						0	0
