# Supplementary material for: Regional and seasonal radiative forcing by perturbations to aerosol and ozone precursor emissions
Source: Copernicus journal article supplement (doi:10.5194/acp-2016-310), 2016-04-27
Supplement: Supplementary file 9 [file eclipse_t4-3_results_oslonitr_90S-28S_final.xlsx]

## Sheet: OsloCTM2
ECLIPSE T4.3 Radiative Forcing Simulations (Absolute RF in mWm-2, Normalised RF in mWm-2 Tg[species]-1)											Perturbation codes: EUS Europe Summer, EUW Europe Winter, CNS China Summer, CNW China Winter, RWS Rest of the World Summer, RWW Rest of the World Winter, SHS Shipping Summer, SHW Shipping Winter, WDS World Summer, WDW World Winter
Model:		OsloCTM2
		Latitude band 90S-28S
	Perturb	ADRF SU	ADRF NI	ADRF SOA	ADRF BC	ADRF OC	AIRF	BC_SNOW	SW O3	LW O3	CH4	PM O3	Total RF	DeltaEmi	nADRF SU	nADRF NI	nADRF SOA	nADRF BC	nADRF OC	nAIRF	nBC_SNOW	nSW O3	nLW O3	nCH4	nPM O3	Total nRF	Total SLnRF	Total LLnRF					ADRF NI/ADRF TOT			ADRF NI/AD+IRF TOT
SO2	EUS	-0.00586142	0.0001043				0.00554221						-0.00021491	0.768	-0.00763206	0.000135807	0	0	0	0.00721642		0	0	0	0	-0.000279831	-0.000279831	0					-0.0177943			-0.326744
	EUW	-0.00261117	-1.06642e-05				0.00481539						0.00219356	0.83	-0.00314599	-1.28484e-05	0	0	0	0.00580167		0	0	0	0	0.00264284	0.00264284	0					0.00408407			-0.00483808
	CNS	-0.886528	0.00133001				-0.0130569						-0.898255	3.149	-0.281527	0.000422359	0	0	0	-0.00414636		0	0	0	0	-0.285251	-0.285251	0					-0.00150025			-0.00147847
	CNW	-0.00994901	-4.55526e-05				0.0070361						-0.00295846	3.317	-0.0029994	-1.37331e-05	0	0	0	0.00212122		0	0	0	0	-0.000891909	-0.000891909	0					0.00457861			0.0156382
	RWS	-3.38198	0.105504				-2.8978						-6.17428	5.156	-0.655931	0.0204624	0	0	0	-0.562025		0	0	0	0	-1.19749	-1.19749	0					-0.0311959			-0.0168006
	RWW	-3.74956	0.0135109				-4.46112						-8.19717	5.15	-0.72807	0.00262348	0	0	0	-0.866237		0	0	0	0	-1.59168	-1.59168	0					-0.00360333			-0.00164553
	SHS	-0.371294	0.00218616				-0.787292						-1.1564	1.048	-0.354288	0.00208603	0	0	0	-0.751233		0	0	0	0	-1.10343	-1.10343	0					-0.00588795			-0.00188692
	SHW	-0.419965	0.000200007				-1.3377						-1.75746	1.031	-0.407338	0.000193993	0	0	0	-1.29748		0	0	0	0	-1.70462	-1.70462	0					-0.000476247			-0.000113791
	WDS	-4.64566	0.109124				-3.69261						-8.22915	10.121	-0.459012	0.010782	0	0	0	-0.364846		0	0	0	0	-0.813076	-0.813076	0					-0.0234895			-0.0130872
	WDW	-4.18209	0.0136547				-5.78697						-9.9554	10.328	-0.404927	0.0013221	0	0	0	-0.560318		0	0	0	0	-0.963923	-0.963923	0					-0.00326504			-0.00136971
NOX	EUS	0.00181476	7.09211e-05				0.00908655		0.00141618	0.000112446	-0.84	-0.134075	-0.961574	0.977	0.00185748	7.25907e-05	0	0	0	0.00930046		0.00144952	0.000115093	-0.859775	-0.137231	-0.984211	0.0127951	-0.997006					0.0390802			0.00650574
[NO2]	EUW	0.00121428	-8.14666e-06				0.00429743		0.00189931	0.000538032	-0.42	-0.0670375	-0.479097	1.029	0.00118006	-7.91707e-06	0	0	0	0.00417632		0.00184578	0.000522869	-0.408163	-0.0651482	-0.465594	0.00771711	-0.473311					-0.00670905			-0.00147806
	CNS	-0.0136008	-0.000106904				0.0164882		0.0281119	0.153501	-1.78	-0.284111	-1.87972	2.023	-0.00672308	-5.28443e-05	0	0	0	0.00815037		0.0138961	0.0758779	-0.879881	-0.14044	-0.929173	0.0911485	-1.02032					0.00786013			-0.0370243
	CNW	0.000587831	1.3301e-05				0.0030713		0.00131344	-0.00629844	-1.18	-0.188343	-1.36966	2.084	0.000282069	6.38244e-06	0	0	0	0.00147375		0.00063025	-0.00302228	-0.566219	-0.0903759	-0.657225	-0.000629831	-0.656595					0.0226273			0.00363502
	RWS	0.0379291	-0.0885017				0.039573		1.37441	3.09202	-11.41	-1.82118	-8.77575	6.357	0.00596651	-0.0139219	0	0	0	0.00622511		0.216204	0.486396	-1.79487	-0.286485	-1.38049	0.70087	-2.08136					-2.33335			-1.14193
	RWW	-0.138429	-0.027307				-0.670316		1.33787	2.98031	-11.76	-1.87705	-10.1549	6.362	-0.0217587	-0.0042922	0	0	0	-0.105362		0.210291	0.468455	-1.84848	-0.295041	-1.59618	0.547332	-2.14352					0.197264			0.0337647
	SHS	0.157577	-0.0039953				-0.244364		0.443497	1.04014	-5.73	-0.914582	-5.25173	1.695	0.0929658	-0.00235711	0	0	0	-0.144168		0.26165	0.613652	-3.38053	-0.539577	-3.09836	0.821743	-3.92011					-0.0253546			0.0460357
	SHW	0.291252	-0.000884582				-1.19496		0.539336	1.07997	-6.96	-1.11091	-7.35619	1.667	0.174716	-0.000530643	0	0	0	-0.716833		0.323537	0.647852	-4.17516	-0.666411	-4.41283	0.428742	-4.84158					-0.00303717			0.000978836
	WDS	0.18372	-0.092533				-0.179216		1.84744	4.28577	-19.76	-3.15395	-16.8688	11.052	0.0166232	-0.00837251	0	0	0	-0.0162157		0.167158	0.387783	-1.78791	-0.285374	-1.52631	0.546976	-2.07329					-0.503663			-20.5455
	WDW	0.154625	-0.0281864				-1.85791		1.88042	4.05452	-20.32	-3.24334	-19.3599	11.142	0.0138777	-0.00252975	0	0	0	-0.166748		0.168769	0.363895	-1.82373	-0.291091	-1.73756	0.377263	-2.11482					-0.182289			0.0165483
CO	EUS	-0.000875926	4.28841e-05	-8.49299e-05			-0.0124394		0.00266184	0.01416	0.29	0.0462878	0.339752	2.348	-0.000373052	1.82641e-05	-3.61712e-05	0	0	-0.00529787		0.00113366	0.00603066	0.123509	0.0197137	0.144699	0.0014755	0.143223					-0.0446311			-0.00320024
	EUW	0.000959187	7.74996e-05	5.14435e-05			-0.00598809		0.00249833	0.0198597	0.46	0.073422	0.55088	3.087	0.000310718	2.51052e-05	1.66646e-05	0	0	-0.00193978		0.000809307	0.00643333	0.149012	0.0237842	0.178452	0.00565535	0.172796					0.0766844			-0.0155701
	CNS	0.00127021	-0.00010562	0.000598524			-0.0597481		0.012657	0.142161	1.57	0.250592	1.91743	12.824	9.90494e-05	-8.23612e-06	4.66722e-05	0	0	-0.00465908		0.000986978	0.0110855	0.122427	0.0195409	0.149519	0.00755092	0.141968					-0.0565195			0.00182483
	CNW	0.0126588	0.000119049	0.00068639			-0.0424909		0.0195333	0.164217	2.51	0.400629	3.06535	16.991	0.00074503	7.00659e-06	4.03973e-05	0	0	-0.00250079		0.00114963	0.00966494	0.147725	0.0235789	0.18041	0.00910621	0.171304					0.00892074			-0.00408461
	RWS	-0.0814225	-0.000479218	0.00141888			-0.665386		0.0836105	0.642907	4.54	0.724643	5.24529	35.039	-0.00232377	-1.36767e-05	4.04943e-05	0	0	-0.0189899		0.00238621	0.0183483	0.12957	0.020681	0.149699	-0.00055228	0.150251					0.00598995			0.000642909
	RWW	-0.00630868	-9.24601e-05	0.00373277			-0.407451		0.0981712	0.680426	5.25	0.837968	6.45645	35.101	-0.000179729	-2.63412e-06	0.000106344	0	0	-0.011608		0.00279682	0.0193848	0.149568	0.0238731	0.183939	0.0104976	0.173441					0.0358942			0.000225498
	SHS	0.000612891	-9.40967e-06	-0.000222732					0.00193845	0.00661356	0.01	0.00159613	0.0205289	0.115	0.00532949	-8.18232e-05	-0.0019368	0	0	0		0.0168561	0.0575092	0.0869565	0.0138794	0.178512	0.0776762	0.100836					-0.0241175			-0.0241175
	SHW	0.0020991	0.000158206	1.71298e-05					0.00135126	0.00506107	0.02	0.00319226	0.031879	0.113	0.0185761	0.00140005	0.000151591	0	0	0		0.0119581	0.0447882	0.176991	0.0282501	0.282115	0.076874	0.205241					0.0747584			0.0747584
	WDS	-0.0810282	-0.000541954	0.00193247			-0.737573		0.0989293	0.799228	6.4	1.02152	7.50247	50.211	-0.00161375	-1.07935e-05	3.84871e-05	0	0	-0.0146895		0.00197027	0.0159174	0.127462	0.0203446	0.149419	0.00161212	0.147807					0.00685187			0.000663615
	WDW	0.00730931	0.000104088	0.0044706			-0.45593		0.120203	0.864503	8.22	1.31202	10.0727	55.179	0.000132465	1.88638e-06	8.102e-05	0	0	-0.00826274		0.00217842	0.0156672	0.14897	0.0237775	0.182546	0.00979828	0.172747					0.0088361			-0.000234354
VOC	EUS	-0.00082034	7.02604e-05	-0.00883499			-0.00592546		0.00197785	0.0100982	0.13	0.0207497	0.147315	0.200426	-0.00409299	0.000350556	-0.0440812	0	0	-0.0295644		0.00986825	0.0503838	0.64862	0.103528	0.735012	-0.0171359	0.752148					-0.00727685			-0.00450942
[C]	EUW	0.00162301	4.44654e-05	-0.00746462			-0.00249995		0.0018335	0.0127866	0.04	0.00638452	0.0527075	0.237702	0.00682792	0.000187064	-0.0314033	0	0	-0.0105172		0.00771344	0.0537925	0.168278	0.0268593	0.221738	0.0266005	0.195137					-0.00761184			-0.00533059
VOC->C:	CNS	-0.00169899	-0.000124789	-0.0185085			-0.00946591		0.0149451	0.0953293	0.15	0.0239419	0.254418	0.501957	-0.00338473	-0.000248605	-0.0368726	0	0	-0.018858		0.0297736	0.189915	0.29883	0.0476972	0.506852	0.160325	0.346527					0.00617538			0.00420542
0.255319	CNW	0.00800847	-1.10803e-05	-0.0276454			-0.00287073		0.00649187	0.0488348	0.01	0.00159613	0.0444041	0.631149	0.0126887	-1.75558e-05	-0.0438017	0	0	-0.00454842		0.0102858	0.0773744	0.0158441	0.00252893	0.0703543	0.0519813	0.018373					0.000564258			0.00049229
	RWS	-0.0320462	0.00311911	-0.346398			-0.335508		0.186089	0.735819	1.66	0.264958	2.13603	2.14085	-0.0149689	0.00145695	-0.161804	0	0	-0.156717		0.0869229	0.343704	0.775393	0.123763	0.997749	0.0985939	0.899155					-0.00824193			-0.00436879
	RWW	-0.00703676	0.000741236	-0.309518			-0.32445		0.16769	0.762721	1.6	0.255381	2.14553	2.15464	-0.00326587	0.000344019	-0.143652	0	0	-0.150582		0.0778274	0.35399	0.742584	0.118526	0.995772	0.134662	0.86111					-0.00234157			-0.00115637
	SHS	0.00121867	4.03507e-06	-0.000867954					0.00378807	-0.00355237	0.09	0.0143652	0.104956	0.0730213	0.0166892	5.52588e-05	-0.0118863	0	0	0		0.0518763	-0.0486484	1.23252	0.196726	1.43733	0.00808601	1.42924					0.0115052			0.0115052
	SHW	0.00143003	-1.925e-05	-0.00065828					0.00596128	-0.00430145	0.07	0.0111729	0.0835852	0.0717447	0.0199322	-0.000268313	-0.00917531	0	0	0		0.0830902	-0.059955	0.975682	0.155732	1.16504	0.0336238	1.13141					-0.0249433			-0.0249433
	WDS	-0.0345655	0.00306458	-0.373741			-0.350899		0.203012	0.841247	1.94	0.309649	2.53777	2.84323	-0.0121571	0.00107785	-0.131449	0	0	-0.123416		0.0714018	0.295877	0.682322	0.108907	0.892563	0.101334	0.791229					-0.00750558			-0.00403656
	WDW	0.00259472	0.000774621	-0.344628			-0.329821		0.176015	0.824342	1.65	0.263361	2.24264	3.02349	0.000858187	0.000256201	-0.113984	0	0	-0.109086		0.058216	0.272646	0.545727	0.0871051	0.741739	0.108907	0.632832					-0.00226475			-0.00115296
BC	EUS				0.00750335		-2.67583e-06	1.97612e-06					0.00750265	0.03	0	0	0	0.250112	0	-8.91943e-05	6.58707e-05	0	0	0	0	0.250088	0.250088	0					0			0
[C]	EUW				0.00352621		-5.36778e-06	1.50881e-07					0.00352099	0.047	0	0	0	0.0750257	0	-0.000114208	3.21023e-06	0	0	0	0	0.0749147	0.0749147	0					0			0
	CNS				1.58044		-0.000710216	0.00056311					1.58029	0.11	0	0	0	14.3676	0	-0.00645651	0.00511918	0	0	0	0	14.3663	14.3663	0					0			0
	CNW				0.0209747		-3.15501e-05	1.15678e-06					0.0209443	0.177	0	0	0	0.118501	0	-0.000178249	6.53548e-06	0	0	0	0	0.118329	0.118329	0					0			0
	RWS				9.49106		-0.172594	0.225242					9.54371	0.351	0	0	0	27.0401	0	-0.491721	0.641715	0	0	0	0	27.1901	27.1901	0					0			0
	RWW				8.43983		-0.218957	0.026585					8.24746	0.359	0	0	0	23.5093	0	-0.609908	0.0740529	0	0	0	0	22.9734	22.9734	0					0			0
	SHS				0.155818		-0.00853487	0.00595867					0.153242	0.012	0	0	0	12.9848	0	-0.711239	0.496556	0	0	0	0	12.7702	12.7702	0					0			0
	SHW				0.130271		-0.013077	0.00412084					0.121315	0.012	0	0	0	10.8559	0	-1.08975	0.343403	0	0	0	0	10.1096	10.1096	0					0			0
	WDS				11.2348		-0.181842	0.231766					11.2847	0.503	0	0	0	22.3356	0	-0.361514	0.460767	0	0	0	0	22.4349	22.4349	0					0			0
	WDW				8.5946		-0.232071	0.0307071					8.39324	0.595	0	0	0	14.4447	0	-0.390035	0.0516087	0	0	0	0	14.1063	14.1063	0					0			0
OC	EUS					-8.91251e-06	-1.09545e-06						-1.0008e-05	0.037	0	0	0	0	-0.000240879	-2.96068e-05		0	0	0	0	-0.000270485	-0.000270485	0					0			0
[C]	EUW					-7.92556e-06	-6.53925e-06						-1.44648e-05	0.067	0	0	0	0	-0.000118292	-9.76007e-05		0	0	0	0	-0.000215893	-0.000215893	0					0			0
	CNS					-0.00710798	-5.8667e-05						-0.00716665	0.212	0	0	0	0	-0.0335282	-0.000276731		0	0	0	0	-0.0338049	-0.0338049	0					0			0
	CNW					0.000182244	-1.70629e-05						0.000165181	0.366	0	0	0	0	0.000497934	-4.66199e-05		0	0	0	0	0.000451314	0.000451314	0					0			0
	RWS					-0.54889	-0.443409						-0.992299	0.804	0	0	0	0	-0.682699	-0.551504		0	0	0	0	-1.2342	-1.2342	0					0			0
	RWW					-0.555031	-0.565587						-1.12062	0.825	0	0	0	0	-0.672765	-0.68556		0	0	0	0	-1.35832	-1.35832	0					0			0
	SHS					-0.00525952							-0.00525952	0.013	0	0	0	0	-0.404578	0		0	0	0	0	-0.404578	-0.404578	0					0			0
	SHW					-0.00747888							-0.00747888	0.013	0	0	0	0	-0.575298	0		0	0	0	0	-0.575298	-0.575298	0					0			0
	WDS					-0.556007	-0.443469						-0.999476	1.053	0	0	0	0	-0.528022	-0.421148		0	0	0	0	-0.94917	-0.94917	0					0			0
	WDW					-0.554857	-0.565611						-1.12047	1.258	0	0	0	0	-0.441063	-0.449611		0	0	0	0	-0.890674	-0.890674	0					0			0
NH3	EUS	0.00128017	9.43556e-05				0.00213526						0.00350979	0.388	0.00329941	0.000243185	0	0	0	0.00550325		0	0	0	0	0.00904584	0.00904584	0					0.0737055			0.0276263
	EUW	0.000788553	-0.000119634				0.00217197						0.00284089	0.384	0.00205352	-0.000311547	0	0	0	0.00565617		0	0	0	0	0.00739815	0.00739815	0					-0.151713			-0.0404098
	CNS	0.00231527	-0.000182012				0.00412514						0.0062584	1.365	0.00169617	-0.000133342	0	0	0	0.00302208		0	0	0	0	0.00458491	0.00458491	0					-0.0786137			-0.0282609
	CNW	0.00174658	-5.59562e-05				0.00419279						0.00588341	1.351	0.00129281	-4.14184e-05	0	0	0	0.00310347		0	0	0	0	0.00435486	0.00435486	0					-0.0320376			-0.00942123
	RWS	0.00158294	-0.174674				-0.0205869						-0.193678	3.481	0.000454737	-0.0501793	0	0	0	-0.00591408		0	0	0	0	-0.0556386	-0.0556386	0					-110.348			9.19145
	RWW	0.0025641	-0.0367611				-0.00166369						-0.0358607	3.426	0.000748424	-0.01073	0	0	0	-0.000485607		0	0	0	0	-0.0104672	-0.0104672	0					-14.3368			-40.8271
	WDS	0.00517838	-0.174762				-0.0143265						-0.18391	5.234	0.000989373	-0.0333897	0	0	0	-0.0027372		0	0	0	0	-0.0351375	-0.0351375	0					-33.7483			19.1036
	WDW	0.00509923	-0.0369367				0.00470107						-0.0271364	5.161	0.000988032	-0.00715689	0	0	0	0.000910884		0	0	0	0	-0.00525797	-0.00525797	0					-7.24358			-3.76893
All	SHS	-0.211885	-0.00181451	-0.00109069	0.155818	-0.00525952	-1.04019	0.00595867	0.449224	1.0432	-5.59	-0.892237	-6.08828	2.95602	-0.0716793	-0.000613837	-0.000368971	0.0527121	-0.00177926	-0.351889	0.00201577	0.151969	0.352907	-1.89106	-0.301837	-2.05962	0.133274	-2.19289					0.0290705			0.00164566
	SHW	-0.125184	-0.000545619	-0.00064115	0.130271	-0.00747888	-2.54574	0.00412084	0.546649	1.08073	-6.82	-1.08856	-8.82638	2.90774	-0.0430519	-0.000187643	-0.000220497	0.0448014	-0.00257206	-0.875502	0.00141719	0.187997	0.371673	-2.34546	-0.374366	-3.03547	-0.315645	-2.71983					0.1799			0.000214072
CH4	Annual	-1.6724	0.022694	0.097901					3.65678	16.2621	124.795		143.162	61.2556	-0.027302	0.000370481	0.00159824	0	0	0		0.0596971	0.26548	2.03728	0	2.33713	0.299843	2.03728					-0.0144135			-0.0144135
	Winter

## Sheet: NorESM
ECLIPSE T4.3 Radiative Forcing Simulations (Absolute RF in mWm-2, Normalised RF in mWm-2 Tg[species]-1)											Perturbation codes: EUS Europe Summer, EUW Europe Winter, CNS China Summer, CNW China Winter, RWS Rest of the World Summer, RWW Rest of the World Winter, SHS Shipping Summer, SHW Shipping Winter, WDS World Summer, WDW World Winter
Model:		NorESM
		Latitude band 90S-28S
	Perturb	ADRF	AIRF	SW O3	LW O3	CH4	PM O3	Total RF	DeltaEMI	nADRF	nAIRF	nSW O3	nLW O3	nCH4	nPM O3	Total nRF	Total SLnRF	Total LLnRF				ADRF NI (from TOT and CTM2 ratio)				nADRF NI
SO2	EUS	-0.0325672	-0.0325254					-0.0650926	0.772418	-0.0421627	-0.0421085	0	0	0	0	-0.0842712	-0.0842712	0				0.000579511				0.000750256
	EUW	-0.0025242	-0.00176398					-0.00428818	0.845032	-0.00298711	-0.00208747	0	0	0	0	-0.00507458	-0.00507458	0				-1.0309e-05				-1.21995e-05
	CNS	-1.20076	-0.490303					-1.69106	3.14062	-0.382332	-0.156117	0	0	0	0	-0.538449	-0.538449	0				0.00180144				0.000573593
	CNW	-0.0314222	-0.0238783					-0.0553005	3.35299	-0.0093714	-0.0071215	0	0	0	0	-0.0164929	-0.0164929	0				-0.00014387				-4.2908e-05
	RWS	-5.47684	-7.26424					-12.7411	5.09299	-1.07537	-1.42632	0	0	0	0	-2.50169	-2.50169	0				0.170855				0.0335471
	RWW	-6.56533	-12.5967					-19.162	5.16615	-1.27084	-2.43831	0	0	0	0	-3.70915	-3.70915	0				0.023657				0.00457924
	SHS							0	1.03896	0	0	0	0	0	0	0	0	0				0				0
	SHW							0	1.03896	0	0	0	0	0	0	0	0	0				0				0
	WDS	-6.71017	-7.78707					-14.4972	9.00603	-0.745075	-0.864651	0	0	0	0	-1.60973	-1.60973	0				0.157619				0.0175015
	WDW	-6.59928	-12.6223					-19.2216	9.36417	-0.704737	-1.34794	0	0	0	0	-2.05268	-2.05268	0				0.0215469				0.002301
NOX	EUS	-0.00251867	-0.00278615	0.000258231	-0.00134834	-0.88366	-0.129377	-1.01943	0.995864	-0.00252913	-0.00279772	0.000259303	-0.00135394	-0.88733	-0.129914	-1.02367	-0.00642149	-1.01724				-9.843e-05				-9.88388e-05
[NO2]	EUW	-0.000124911	-0.00033903	-0.000480554	-0.00395679	-0.3214	-0.06497	-0.391271	1.0608	-0.000117752	-0.000319598	-0.000453011	-0.00373001	-0.302979	-0.0612463	-0.368846	-0.00462037	-0.364225				8.38034e-07				7.90002e-07
	CNS	0.0289117	0.0156091	0.0487345	0.147412	-1.77983	-0.260586	-1.79975	2.0201	0.014312	0.00772689	0.0241248	0.0729726	-0.881059	-0.128996	-0.89092	0.119136	-1.01006				0.00022725				0.000112494
	CNW	0.00391589	0.00553251	0.00251151	-0.00372871	-0.96133	-0.19433	-1.14743	2.11131	0.00185472	0.00262042	0.00118955	-0.00176606	-0.455324	-0.0920423	-0.543468	0.00389862	-0.547366				8.86058e-05				4.19672e-05
	RWS	0.421382	2.68179	1.62734	3.42717	-13.1557	-1.92613	-6.92412	6.27179	0.0671869	0.427596	0.25947	0.546442	-2.0976	-0.30711	-1.10401	1.3007	-2.40471				-0.98323				-0.15677
	RWW	0.552414	2.11379	2.22285	4.63079	-13.868	-2.80338	-7.15157	6.37335	0.0866756	0.331661	0.348772	0.726586	-2.17594	-0.439859	-1.1221	1.49369	-2.6158				0.108971				0.0170979
	SHS							0	1.09606	0	0	0	0	0	0	0	0	0				0				0
	SHW							0	1.09606	0	0	0	0	0	0	0	0	0				0				0
	WDS	0.447775	2.69461	1.67633	3.57323	-15.8192	-2.31609	-9.7433	9.28775	0.0482113	0.290125	0.180489	0.384725	-1.70323	-0.24937	-1.04905	0.903551	-1.9526				-0.225528				-0.0242823
	WDW	0.556205	2.11898	2.22488	4.6231	-15.1508	-3.06268	-8.69027	9.54546	0.058269	0.221989	0.233083	0.484325	-1.58722	-0.320852	-0.910408	0.997665	-1.90807				-0.10139				-0.0106218
CO	EUS	0.000124323	0.00144701	0.00362914	0.00122356	0.23461	0.0343494	0.275383	2.47364	5.02591e-05	0.000584971	0.00146712	0.000494639	0.094844	0.0138862	0.111327	0.00259699	0.10873				-5.54868e-06				-2.24312e-06
	EUW	-0.000363223	0.00277467	0.00447965	0.0129168	0.34922	0.0705938	0.439622	3.10853	-0.000116847	0.000892598	0.00144108	0.00415527	0.112342	0.0227097	0.141424	0.00637211	0.135052				-2.78535e-05				-8.96035e-06
	CNS	-0.0065995	0.0163602	0.0266514	0.0529271	1.13046	0.165511	1.38531	12.9065	-0.00051133	0.00126759	0.00206495	0.0041008	0.0875882	0.0128238	0.107334	0.00692201	0.100412				0.000373001				2.89001e-05
	CNW	-0.00301814	0.0196703	0.0370277	0.0962876	1.89796	0.383667	2.43159	17.1191	-0.000176302	0.00114903	0.00216294	0.00562457	0.110868	0.0224116	0.14204	0.00876023	0.133279				-2.6924e-05				-1.57275e-06
	RWS	-0.0418108	-0.0416741	0.159115	0.44798	3.24023	0.474404	4.23824	34.6446	-0.00120685	-0.0012029	0.00459278	0.0129307	0.0935277	0.0136934	0.122335	0.0151137	0.107221				-0.000250445				-7.22897e-06
	RWW	-0.029519	0.118046	0.171091	0.523623	3.91534	0.791474	5.49005	35.1645	-0.000839454	0.00335696	0.00486544	0.0148907	0.111343	0.0225077	0.156125	0.0222736	0.133851				-0.00105956				-3.01315e-05
	SHS							0	0.114038	0	0	0	0	0	0	0	0	0				0				0
	SHW							0	0.114038	0	0	0	0	0	0	0	0	0				0				0
	WDS	-0.048286	-0.0238669	0.189396	0.502131	4.6053	0.674264	5.89894	50.0248	-0.000965241	-0.000477101	0.00378603	0.0100376	0.0920603	0.0134786	0.11792	0.0123813	0.105539				-0.000330849				-6.61371e-06
	WDW	-0.0329004	0.140491	0.212598	0.632827	6.16252	1.24573	8.36127	55.3922	-0.000593953	0.0025363	0.00383806	0.0114245	0.111253	0.0224894	0.150947	0.0172049	0.133742				-0.000290711				-5.24823e-06
VOC	EUS	0.000699517	0.00258945	0.00316611	0.00836606	0.11037	0.0161593	0.14135	0.28136	0.0024862	0.00920333	0.0112529	0.0297344	0.392273	0.0574329	0.502383	0.0526768	0.449706				-5.09028e-06				-1.80917e-05
[C]	EUW	0.000993692	0.00334499	0.00315551	0.0117096	0.10372	0.0209667	0.14389	0.36227	0.00274296	0.00923342	0.00871038	0.0323229	0.286306	0.0578758	0.397191	0.0530096	0.344182				-7.56382e-06				-2.0879e-05
	CNS	-0.0331251	-0.0208046	0.0288407	0.0679102	0.1131	0.016559	0.17248	0.552548	-0.0599497	-0.0376521	0.0521958	0.122904	0.204688	0.0299685	0.312154	0.0774977	0.234657				-0.00020456				-0.000370213
	CNW	-2.97012e-06	0.00381428	0.0165718	0.0550719	0.24497	0.0495199	0.369945	0.842324	-3.5261e-06	0.00452828	0.0196739	0.0653809	0.290826	0.0587897	0.439196	0.0895796	0.349616				-1.67591e-09				-1.98963e-09
	RWS	-0.300321	-0.74841	0.189089	0.375334	1.34266	0.19658	1.05493	4.07751	-0.073653	-0.183546	0.0463736	0.0920498	0.329284	0.0482107	0.25872	-0.118775	0.377495				0.00247522				0.000607043
	RWW	-0.404055	-1.64593	0.130782	0.3204	1.73918	0.35157	0.491947	4.16575	-0.0969945	-0.39511	0.0313946	0.0769129	0.417495	0.0843953	0.118093	-0.383797	0.50189				0.000946124				0.00022712
	SHS							0	0.209536	0	0	0	0	0	0	0	0	0				0				0
	SHW							0	0.209536	0	0	0	0	0	0	0	0	0				0				0
	WDS	-0.332747	-0.766625	0.221096	0.45161	1.56613	0.229298	1.36876	4.91142	-0.0677496	-0.15609	0.0450167	0.0919511	0.318875	0.0466867	0.27869	-0.0868722	0.365562				0.00249746				0.0005085
	WDW	-0.403064	-1.63877	0.150509	0.387182	2.08787	0.422057	1.00578	5.37034	-0.0750537	-0.305152	0.028026	0.0720962	0.388778	0.0785902	0.187285	-0.280083	0.467368				0.000912841				0.000169978
BC	EUS	0.190621	0.00423495					0.194856	0.031786	5.99701	0.133233	0	0	0	0	6.13024	6.13024	0				0				0
[C]	EUW	0.0706872	0.000275882					0.0709631	0.047604	1.4849	0.00579535	0	0	0	0	1.4907	1.4907	0				0				0
	CNS	2.3731	0.149785					2.52289	0.108732	21.8252	1.37756	0	0	0	0	23.2028	23.2028	0				0				0
	CNW	0.687793	0.013339					0.701132	0.177482	3.87528	0.0751569	0	0	0	0	3.95044	3.95044	0				0				0
	RWS	15.804	2.96997					18.774	0.342568	46.1339	8.66972	0	0	0	0	54.8036	54.8036	0				0				0
	RWW	14.4649	2.51305					16.9779	0.357486	40.4628	7.02979	0	0	0	0	47.4926	47.4926	0				0				0
	SHS							0	0.012164	0	0	0	0	0	0	0	0	0				0				0
	SHW							0	0.012196	0	0	0	0	0	0	0	0	0				0				0
	WDS	18.3677	3.12399					21.4917	0.483086	38.0216	6.46674	0	0	0	0	44.4884	44.4884	0				0				0
	WDW	15.2234	2.52666					17.75	0.582572	26.1313	4.33709	0	0	0	0	30.4684	30.4684	0				0				0
OC	EUS	-0.00177615	-0.00417643					-0.00595258	0.03996	-0.0444482	-0.104515	0	0	0	0	-0.148963	-0.148963	0				0				0
[C]	EUW	-0.000160449	-0.000416571					-0.00057702	0.0655371	-0.00244821	-0.00635626	0	0	0	0	-0.00880447	-0.00880447	0				0				0
OC->C:	CNS	-0.0925295	-0.166524					-0.259053	0.211923	-0.436619	-0.785776	0	0	0	0	-1.2224	-1.2224	0				0				0
1.4	CNW	-0.00505096	-0.0124056					-0.0174566	0.367731	-0.0137355	-0.0337355	0	0	0	0	-0.0474709	-0.0474709	0				0				0
	RWS	-1.54019	-5.68387					-7.22406	0.783989	-1.96456	-7.24994	0	0	0	0	-9.2145	-9.2145	0				0				0
	RWW	-1.45828	-7.88592					-9.3442	0.821396	-1.77537	-9.60063	0	0	0	0	-11.376	-11.376	0				0				0
	SHS							0	0.0127143	0	0	0	0	0	0	0	0	0				0				0
	SHW							0	0.0127471	0	0	0	0	0	0	0	0	0				0				0
	WDS	-1.6345	-5.85457					-7.48907	1.03587	-1.57789	-5.65183	0	0	0	0	-7.22973	-7.22973	0				0				0
	WDW	-1.46349	-7.89874					-9.36223	1.25466	-1.16644	-6.2955	0	0	0	0	-7.46194	-7.46194	0				0				0
NH3	EUS							0	-999	0	0	0	0	0	0	0	0	0				0				0
	EUW							0	-999	0	0	0	0	0	0	0	0	0				0				0
	CNS							0	-999	0	0	0	0	0	0	0	0	0				0				0
	CNW							0	-999	0	0	0	0	0	0	0	0	0				0				0
	RWS							0	-999	0	0	0	0	0	0	0	0	0				0				0
	RWW							0	-999	0	0	0	0	0	0	0	0	0				0				0
	WDS							0	-999	0	0	0	0	0	0	0	0	0				0				0
	WDW							0	-999	0	0	0	0	0	0	0	0	0				0				0
All	SHS	-0.0972084	-0.382657	0.384505	0.857365	-4.27817	-0.626369	-4.14253	2.47131	-0.0393348	-0.15484	0.155588	0.346928	-1.73114	-0.253456	-1.67625	0.308341	-1.98459				-0.0028259				-0.00114348
	SHW	-0.0138841	-2.59384	0.449489	0.833877	-5.25084	-1.06144	-7.63664	2.47135	-0.00561803	-1.04957	0.18188	0.337418	-2.12469	-0.429499	-3.09007	-0.535886	-2.55419				-0.00249775				-0.00101068
CH4	Summer	-0.265573	0.307898	2.22921	5.14704	50.3806		57.7992	36.5239	-0.00727121	0.00843003	0.0610342	0.140922	1.37939	0	1.5825	0.203115	1.37939				0.00382783				0.000104803
	Winter	-1.109	-1.9291	3.10232	6.80279	48.9996		55.8666	35.2606	-0.0314516	-0.0547099	0.0879827	0.192929	1.38964	0	1.58439	0.19475	1.38964				0				0

## Sheet: HadGEM3
ECLIPSE T4.3 Radiative Forcing Simulations (Absolute RF in mWm-2, Normalised RF in mWm-2 Tg[species]-1)											Perturbation codes: EUS Europe Summer, EUW Europe Winter, CNS China Summer, CNW China Winter, RWS Rest of the World Summer, RWW Rest of the World Winter, SHS Shipping Summer, SHW Shipping Winter, WDS World Summer, WDW World Winter
Model:		HadGEM3									Note: Methane RF is Delta[CH4]_ppb * RF/ppb, increased by 15% to represent stratospheric water changes
		Latitude band 90S-28S									Note: Primary mode ozone RF is DeltaCH4(ppb) * [Ozone RF / DeltaCH4(ppb)]_in_CH4_perturb
	Perturb	ARF	SW+LW O3	CH4	PM O3	Total RF	DeltaEmi	nARF	nSW+LW O3	nCH4	nPM O3	Total nRF	Total SLnRF	Total LLnRF												ADRF NI (from TOT and CTM2 ratio)				nADRF NI
SO2	EUS	1.92252				1.92252	-0.771942	-2.4905	0	0	0	-2.4905	-2.4905	0												-0.628172				0.813756
	EUW	0.289295				0.289295	-0.845543	-0.342141	0	0	0	-0.342141	-0.342141	0												-0.00139963				0.00165531
	CNS	-0.233241				-0.233241	-3.14065	0.0742652	0	0	0	0.0742652	0.0742652	0												0.00034484				-0.000109799
	CNW	1.80316				1.80316	-3.35314	-0.537753	0	0	0	-0.537753	-0.537753	0												0.0281981				-0.00840947
	RWS	21.7745				21.7745	-4.61614	-4.71704	0	0	0	-4.71704	-4.71704	0												-0.365824				0.079249
	RWW	20.0515				20.0515	-4.68146	-4.28317	0	0	0	-4.28317	-4.28317	0				Cells below are used to compute columns E and F:								-0.0329953				0.00704808
	SHS					0	-999	0	0	0	0	0	0	0												0				0
	SHW					0	-999	0	0	0	0	0	0	0				Delta[CH4]_ppb		RF/ppb		OzoneRF/DeltaCH4_o3_perturb				0				0
	WDS	23.4638				23.4638	-8.52873	-2.75115	0	0	0	-2.75115	-2.75115	0												-0.307075				0.0360047
	WDW	22.144				22.144	-8.88014	-2.49365	0	0	0	-2.49365	-2.49365	0												-0.0303307				0.00341557
NOX	EUS	-0.17173	-0.0483374	0.584898	0.0983242	0.463154	-0.996201	0.172385	0.0485217	-0.587128	-0.0986992	-0.464921	0.220907	-0.685827				1.40112		0.363		0.0710635				-0.00111723				0.00112149
[NO2]	EUW	0.116883	-0.0400809	0.22707	0.0381716	0.342044	-1.06187	-0.110073	0.0377456	-0.21384	-0.0359475	-0.322114	-0.0723272	-0.249787				0.543945		0.363		0.145589				-0.000172761				0.000162695
	CNS	0.348384	-0.0156307	1.26346	0.212394	1.80861	-2.02965	-0.171647	0.00770118	-0.622501	-0.104645	-0.891092	-0.163946	-0.727146				3.02661		0.363		0.145589				-0.0128987				0.00635512
	CNW	0.487603	0.0888672	0.659654	0.110891	1.34702	-2.13188	-0.22872	-0.0416849	-0.309424	-0.0520157	-0.631844	-0.270405	-0.36144				1.5802		0.363		0.145589				0.00177244				-0.0008314
	RWS	2.52788	-5.25259	11.3	1.89959	10.4749	-7.17435	-0.35235	0.732135	-1.57506	-0.264776	-1.46005	0.379785	-1.83984				27.0692		0.363		0.145589				-2.88665				0.402357
	RWW	1.98482	-4.64247	10.8081	1.81689	9.96731	-6.68958	-0.296703	0.693985	-1.61566	-0.2716	-1.48998	0.397282	-1.88726				25.8907		0.363		0.145589				0.0670168				-0.0100181
	SHS					0	-999	0	0	0	0	0	0	0												0				0
	SHW					0	-999	0	0	0	0	0	0	0												0				0
	WDS	2.70453	-5.31656	13.1484	2.21031	12.7467	-10.2002	-0.265145	0.521221	-1.28903	-0.216693	-1.24965	0.256076	-1.50573												-55.566				5.44754
	WDW	2.58931	-4.59368	11.6948	1.96595	11.6564	-9.88333	-0.261987	0.464791	-1.18329	-0.198916	-1.1794	0.202804	-1.3822												0.0428486				-0.00433544
CO	EUS	0.101674	-0.0104051	-0.158684	-0.0266756	-0.0940907	-2.43213	-0.0418045	0.00427818	0.0652449	0.010968	0.0386865	-0.0375263	0.0762129				-0.380127		0.363		0.145589				-0.000325382				0.000133785
	EUW	-0.00158659	-0.0192851	-0.253568	-0.0426261	-0.317066	-3.18188	0.000498633	0.00606091	0.0796914	0.0133965	0.0996474	0.00655955	0.0930879				-0.607422		0.363		0.145589				2.47034e-05				-7.76377e-06
	CNS	0.260339	0.0553065	-0.751276	-0.126293	-0.561924	-13.0988	-0.019875	-0.00422226	0.0573546	0.00964159	0.0428989	-0.0240973	0.0669962				-1.79968		0.363		0.145589				0.000475074				-3.62685e-05
	CNW	-0.0217401	0.0585862	-1.31732	-0.221448	-1.50192	-17.5773	0.00123683	-0.00333306	0.0749445	0.0125985	0.0854468	-0.00209623	0.087543				-3.15564		0.363		0.145589				8.87999e-05				-5.05197e-06
	RWS	-1.43106	-1.11835	-4.09761	-0.688828	-7.33584	-64.3906	0.0222247	0.0173682	0.0636367	0.0106976	0.113927	0.0395929	0.0743344				-9.8158		0.363		0.145589				-0.000920042				1.42885e-05
	RWW	-0.794477	-0.528714	-4.00129	-0.672637	-5.99712	-51.4021	0.0154561	0.0102858	0.077843	0.0130858	0.116671	0.025742	0.0909288				-9.58508		0.363		0.145589				-0.000179153				3.48532e-06
	SHS					0	-999	0	0	0	0	0	0	0												0				0
	SHW					0	-999	0	0	0	0	0	0	0												0				0
	WDS	-1.06905	-1.07345	-5.00757	-0.841797	-7.99186	-79.9215	0.0133762	0.0134313	0.062656	0.0105328	0.0999963	0.0268075	0.0731888												-0.000709436				8.87665e-06
	WDW	-0.817804	-0.489413	-5.57218	-0.936712	-7.81611	-72.1613	0.011333	0.00678221	0.0772184	0.0129808	0.108314	0.0181152	0.0901993												0.000191656				-2.65594e-06
VOC	EUS	0.0541131	-0.0066802	-0.0249186	-0.00418894	0.0183254	-0.0563011	-0.961138	0.118651	0.442595	0.0744025	-0.325489	-0.842486	0.516998				-0.0596924		0.363		0.145589				-0.000244019				0.00433418
[C]	EUW	0.0379902	-0.0132146	-0.0233898	-0.00393195	-0.0025462	-0.0668507	-0.568284	0.197673	0.349882	0.0588169	0.0380878	-0.370611	0.408699				-0.0560303		0.363		0.145589				-0.00020251				0.00302929
	CNS	0.0890368	-0.00124341	-0.0466776	-0.00784674	0.0332691	-0.145189	-0.613248	0.00856408	0.321495	0.054045	-0.229143	-0.604683	0.37554				-0.111816		0.363		0.145589				0.000374437				-0.00257896
	CNW	0.373811	0.00776261	-0.0886672	-0.0149054	0.278001	-0.189049	-1.97732	-0.0410614	0.469017	0.0788441	-1.47052	-2.01838	0.547861				-0.212402		0.363		0.145589				0.000184023				-0.000973417
	RWS	-0.379497	-0.488746	-0.53975	-0.0907347	-1.49873	-1.44339	0.262921	0.33861	0.373946	0.0628622	1.03834	0.60153	0.436809				-1.29297		0.363		0.145589				0.00165794				-0.00114865
	RWW	-0.37697	-0.0600115	-0.578632	-0.0972709	-1.11288	-1.05804	0.356291	0.0567195	0.54689	0.091935	1.05184	0.41301	0.638825				-1.38611		0.363		0.145589				0.000435915				-0.000412003
	SHS					0	-999	0	0	0	0	0	0	0												0				0
	SHW					0	-999	0	0	0	0	0	0	0												0				0
	WDS	-0.236347	-0.49667	-0.611347	-0.10277	-1.44713	-1.64488	0.143687	0.301949	0.371666	0.062479	0.879781	0.445635	0.434145												0.000954029				-0.000579999
	WDW	0.0348312	-0.0654635	-0.690689	-0.116108	-0.837429	-1.31394	-0.026509	0.0498223	0.525662	0.0883665	0.637342	0.0233133	0.614029												-4.0159e-05				3.05638e-05
BC	EUS	0.376141				0.376141	-0.031302	-12.0165	0	0	0	-12.0165	-12.0165	0												0				0
[C]	EUW	0.054713				0.054713	-0.048614	-1.12546	0	0	0	-1.12546	-1.12546	0												0				0
	CNS	1.16041				1.16041	-0.11036	-10.5148	0	0	0	-10.5148	-10.5148	0												0				0
	CNW	1.59173				1.59173	-0.177213	-8.98202	0	0	0	-8.98202	-8.98202	0												0				0
	RWS	-7.58285				-7.58285	-0.31334	24.2001	0	0	0	24.2001	24.2001	0												0				0
	RWW	-10.8302				-10.8302	-0.321528	33.6835	0	0	0	33.6835	33.6835	0												0				0
	SHS					0	-999	0	0	0	0	0	0	0												0				0
	SHW					0	-999	0	0	0	0	0	0	0												0				0
	WDS	-6.0463				-6.0463	-0.455002	13.2885	0	0	0	13.2885	13.2885	0												0				0
	WDW	-9.18376				-9.18376	-0.547355	16.7784	0	0	0	16.7784	16.7784	0												0				0
OC	EUS	-0.00772496				-0.00772496	-0.0394859	0.195638	0	0	0	0.195638	0.195638	0												0				0
[C]	EUW	0.154228				0.154228	-0.0689392	-2.23716	0	0	0	-2.23716	-2.23716	0												0				0
OC->C:	CNS	-0.521936				-0.521936	-0.215149	2.42593	0	0	0	2.42593	2.42593	0												0				0
1.4	CNW	-0.633357				-0.633357	-0.367132	1.72515	0	0	0	1.72515	1.72515	0												0				0
	RWS	3.01355				3.01355	-0.743451	-4.05346	0	0	0	-4.05346	-4.05346	0												0				0
	RWW	1.71579				1.71579	-0.76317	-2.24824	0	0	0	-2.24824	-2.24824	0												0				0
	SHS					0	-999	0	0	0	0	0	0	0												0				0
	SHW					0	-999	0	0	0	0	0	0	0												0				0
	WDS	2.48389				2.48389	-0.998086	-2.48865	0	0	0	-2.48865	-2.48865	0												0				0
	WDW	1.23666				1.23666	-1.19924	-1.0312	0	0	0	-1.0312	-1.0312	0												0				0
NH3	EUS					0	-999	0	0	0	0	0	0	0												0				0
	EUW					0	-999	0	0	0	0	0	0	0												0				0
	CNS					0	-999	0	0	0	0	0	0	0												0				0
	CNW					0	-999	0	0	0	0	0	0	0												0				0
	RWS					0	-999	0	0	0	0	0	0	0												0				0
	RWW					0	-999	0	0	0	0	0	0	0												0				0
	WDS					0	-999	0	0	0	0	0	0	0												0				0
	WDW					0	-999	0	0	0	0	0	0	0												0				0
All	SHS	2.10767	-1.11591	4.03202	0.677803	5.70158	-2.81	-0.75006	0.397121	-1.43488	-0.241211	-2.02903	-0.35294	-1.67609				9.65869		0.363		0.145589				0.0034685				-0.00123434
	SHW	1.933	-1.41281	5.03411	0.84626	6.40056	-2.81	-0.6879	0.502779	-1.7915	-0.30116	-2.27778	-0.185121	-2.09266				12.0592		0.363		0.145589				0.0004138				-0.00014726
CH4	Annual	-12.7082	-23.7352	-141.193		-177.636	-117.113	0.108512	0.20267	1.20561	0	1.51679	0.311182	1.20561												0.183169				-0.00156404
	N/A					0	-999	0	0	0	0	0	0	0												0				0

## Sheet: ECHAM6
ECLIPSE T4.3 Radiative Forcing Simulations (Absolute RF in mWm-2, Normalised RF in mWm-2 Tg[species]-1)											Perturbation codes: EUS Europe Summer, EUW Europe Winter, CNS China Summer, CNW China Winter, RWS Rest of the World Summer, RWW Rest of the World Winter, SHS Shipping Summer, SHW Shipping Winter, WDS World Summer, WDW World Winter
Model:		ECHAM6-HAMMOZ
		Latitude band 90S-28S
	Perturb	ADRF	AIRF	Total RF	DeltaEmi	nADRF	nAIRF	Total nRF	Total SLnRF	Total LLnRF							ADRF NI (from TOT and CTM2 ratio)				nADRF NI
SO2	EUS	-0.00777431		-0.00777431	0.754654	-0.0103018	0	-0.0103018	-0.0103018	0							0.000138339				0.000183314
	EUW	-0.00369683		-0.00369683	0.822845	-0.00449274	0	-0.00449274	-0.00449274	0							-1.50981e-05				-1.83487e-05
	CNS	-0.16392		-0.16392	3.07068	-0.0533823	0	-0.0533823	-0.0533823	0							0.00024592				8.00866e-05
	CNW	-0.0269488		-0.0269488	3.26286	-0.00825926	0	-0.00825926	-0.00825926	0							-0.000123388				-3.78159e-05
	RWS	-1.77664		-1.77664	4.97903	-0.356825	0	-0.356825	-0.356825	0							0.0554239				0.0111315
	RWW	-2.32303		-2.32303	5.02554	-0.462245	0	-0.462245	-0.462245	0							0.00837064				0.00166562
	SHS				1.24748												0				0
	SHW				1.23947												0				0
	WDS	-1.94833		-1.94833	8.80436	-0.221292	0	-0.221292	-0.221292	0							0.0457655				0.00519804
	WDW	-2.35368		-2.35368	9.11125	-0.258326	0	-0.258326	-0.258326	0							0.00768485				0.000843447
NOX	EUS
[NO2]	EUW
	CNS
	CNW
	RWS
	RWW
	SHS
	SHW
	WDS
	WDW
CO	EUS
	EUW
	CNS
	CNW
	RWS
	RWW
	SHS
	SHW
	WDS
	WDW
VOC	EUS
[C]	EUW
	CNS
	CNW
	RWS
	RWW
	SHS
	SHW
	WDS
	WDW
BC	EUS	0.00055698		0.00055698	0.03122	0.0178405	0	0.0178405	0.0178405	0
[C]	EUW	0.000839327		0.000839327	0.0485559	0.0172858	0	0.0172858	0.0172858	0
	CNS	0.00522915		0.00522915	0.110691	0.047241	0	0.047241	0.047241	0
	CNW	0.00309591		0.00309591	0.177134	0.0174778	0	0.0174778	0.0174778	0
	RWS	1.24196		1.24196	0.3494	3.55455	0	3.55455	3.55455	0
	RWW	1.73664		1.73664	0.358214	4.84805	0	4.84805	4.84805	0
	SHS				0.0147238
	SHW				0.0146251
	WDS	1.24775		1.24775	0.491311	2.53963	0	2.53963	2.53963	0
	WDW	1.74058		1.74058	0.583904	2.98093	0	2.98093	2.98093	0
OC	EUS	-0.000311994		-0.000311994	0.0373764	-0.00834735	0	-0.00834735	-0.00834735	0
[C]	EUW	-0.000330488		-0.000330488	0.0686226	-0.00481602	0	-0.00481602	-0.00481602	0
OC->C:	CNS	-6.29778e-05		-6.29778e-05	0.215786	-0.000291853	0	-0.000291853	-0.000291853	0
1.4	CNW	5.30198e-06		5.30198e-06	0.367085	1.44435e-05	0	1.44435e-05	1.44435e-05	0
	RWS	-0.116569		-0.116569	0.801567	-0.145426	0	-0.145426	-0.145426	0
	RWW	-0.0963231		-0.0963231	0.822269	-0.117143	0	-0.117143	-0.117143	0
	SHS				0.0156937
	SHW				0.0156975
	WDS	-0.116944		-0.116944	1.05473	-0.110876	0	-0.110876	-0.110876	0
	WDW	-0.0966483		-0.0966483	1.25798	-0.0768284	0	-0.0768284	-0.0768284	0
NH3	EUS
	EUW
	CNS
	CNW
	RWS
	RWW
	WDS
	WDW
All	SHS	-0.187329		-0.187329	1.2779	-0.146592	0	-0.146592	-0.146592	0
	SHW	-0.320117		-0.320117	1.26979	-0.252102	0	-0.252102	-0.252102	0
CH4	Summer
	Winter

## Sheet: Methane
Model	tau_OH_Control(yr)	tau_OH_perturb(yr)	tau_CH4_control(yr)	tau_CH4_perturb(yr)	Burden_Control(Tg[CH4])	Burden_Perturb(Tg[CH4])	DeltaBurden(Tg[CH4])	s	f	DeltaEmiss(Tg[CH4]/yr)	CH4_VMR_control(ppbv)	CH4_VMR_perturb(ppbv)	RF_CH4(Wm-2)	NRF_CH4(mWm-2/Tg[CH4])	NRF_SWV(mWm-2/Tg[CH4])	RF_Ozone(mWm-2)	NRF_Ozone(mWm-2/Tg[CH4]/yr)	NRF_O3/NRF_CH4
OsloCTM2	10.2429	9.61573	8.91171	8.43316	4909.33	4115.04	794.299	0.312737	1.45505	61.2556	1728.18	1448.57	0.108517	1.77155	0.265732	19.9189	0.325177	0.183555
HadGEM3	5.96	5.63	5.4834	5.20283	4560.8	3702.4	858.4	0.251891	1.3367	117.113	1605.49	1303.32	0.122776	1.04836	0.157254	23.7352	0.20267	0.193321
NorESM(S)	7.8	7.67	7.00337	6.89839	4814.81	4488.79	326.02	0.215415	1.27456	36.5239	1694.91	1580.14	0.0438092	1.19947	0.17992	7.37625	0.201957	0.168372
NorESM(W)	7.8	7.67	7.00337	6.89839	4814.81	4497.57	317.24	0.22159	1.28467	35.2606	1694.91	1583.23	0.0426083	1.20838	0.181258	9.90511	0.280912	0.232469
													Formula in Table 3 of Myhre et al. (1998)		Stratospheric water vapour contribution (extra 15% Myhre et al., 2007)
tau_strat	120	yr
tau_soil	160	yr
Matm	5130000	Tg (assumes methane is well mixed throughout the atmosphere)
m_dry_air	28.966
m_methane	16.04
factor	0.35202	Conversion burden (Tg) to vmr (ppbv)
C0	1788	Reference methane mass-mixing ratio (ppb) (WMO Ozone Assessment Report)
N2O_mmr	325	pbb (WMO, 2014)

## Sheet: Best(OsloNitr)
# Best estimates of ECLIPSE T4.3 Radiative Forcing Simulations (Normalised RF in mWm-2 Tg[species]-1)														Best estimates are given for each main process.					Perturbation codes: EUS Europe Summer, EUW Europe Winter, CNS China Summer, CNW China Winter, RWS Rest of the World Summer, RWW Rest of the World Winter, SHS Shipping Summer, SHW Shipping Winter, WDS World Summer, WDW World Winter
#			Latitude band 90S-28S											Nitrate RF is directly taken from OsloCTM2 and added to NorESM, HadGEM3, and ECHAM6.											Note: Best/low/high estimates of total nRF are sums of component best/low/high estimates, not averages of modelled nRF.
# Model:			OsloCTM2							NorESM					HadGEM3					ECHAM6		Include in	Best							Low							High
Species	Units	Perturb	AD+IRF	BC_SNOW	BC_SEMID	Ozone	Methane	PM Ozone	Total nRF	AD+IRF	Ozone	Methane	PM Ozone	Total nRF	AD+IRF	Ozone	Methane	PM Ozone	Total nRF	AD+IRF	Total nRF		AD+IRF	BC_SNOW	BC_SEMID	Ozone	Methane	PM Ozone	Total nRF	AD+IRF	BC_SNOW	BC_SEMID	Ozone	Methane	PM Ozone	Total nRF	AD+IRF	BC_SNOW	BC_SEMID	Ozone	Methane	PM Ozone	Total nRF
SO2	SO2	EUS	-0.000279831	0		0	0	0	-0.000279831	-0.0841354	0	0	0	-0.0841354	-2.49036	0	0	0	-2.49036	-0.010166	-0.010166	O,N,H	-0.858259	0	0	0	0	0	-0.858259	-2.49036	0	0	0	0	0	-2.49036	-0.000279831	0	0	0	0	0	-0.000279831
SO2	SO2	EUW	0.00264284	0		0	0	0	0.00264284	-0.00508743	0	0	0	-0.00508743	-0.342154	0	0	0	-0.342154	-0.00450559	-0.00450559	O,N,H	-0.114866	0	0	0	0	0	-0.114866	-0.342154	0	0	0	0	0	-0.342154	0.00264284	0	0	0	0	0	0.00264284
SO2	SO2	CNS	-0.285251	0		0	0	0	-0.285251	-0.538027	0	0	0	-0.538027	0.0746876	0	0	0	0.0746876	-0.05296	-0.05296	O,N,H	-0.24953	0	0	0	0	0	-0.24953	-0.538027	0	0	0	0	0	-0.538027	0.0746876	0	0	0	0	0	0.0746876
SO2	SO2	CNW	-0.000891909	0		0	0	0	-0.000891909	-0.0165066	0	0	0	-0.0165066	-0.537766	0	0	0	-0.537766	-0.00827299	-0.00827299	O,N,H	-0.185055	0	0	0	0	0	-0.185055	-0.537766	0	0	0	0	0	-0.537766	-0.000891909	0	0	0	0	0	-0.000891909
SO2	SO2	RWS	-1.19749	0		0	0	0	-1.19749	-2.48123	0	0	0	-2.48123	-4.69657	0	0	0	-4.69657	-0.336362	-0.336362	O,N,H	-2.79176	0	0	0	0	0	-2.79176	-4.69657	0	0	0	0	0	-4.69657	-1.19749	0	0	0	0	0	-1.19749
SO2	SO2	RWW	-1.59168	0		0	0	0	-1.59168	-3.70653	0	0	0	-3.70653	-4.28055	0	0	0	-4.28055	-0.459621	-0.459621	O,N,H	-3.19292	0	0	0	0	0	-3.19292	-4.28055	0	0	0	0	0	-4.28055	-1.59168	0	0	0	0	0	-1.59168
SO2	SO2	SHS	-1.10343	0		0	0	0	-1.10343	0	0	0	0	0	0	0	0	0	0	0	0
SO2	SO2	SHW	-1.70462	0		0	0	0	-1.70462	0	0	0	0	0	0	0	0	0	0	0	0
SO2	SO2	WDS	-0.813076	0		0	0	0	-0.813076	-1.59894	0	0	0	-1.59894	-2.74036	0	0	0	-2.74036	-0.21051	-0.21051	O,N,H	-1.71746	0	0	0	0	0	-1.71746	-2.74036	0	0	0	0	0	-2.74036	-0.813076	0	0	0	0	0	-0.813076
SO2	SO2	WDW	-0.963923	0		0	0	0	-0.963923	-2.05135	0	0	0	-2.05135	-2.49233	0	0	0	-2.49233	-0.257004	-0.257004	O,N,H	-1.83587	0	0	0	0	0	-1.83587	-2.49233	0	0	0	0	0	-2.49233	-0.963923	0	0	0	0	0	-0.963923
NOX	NO2	EUS	0.0112305	0		0.00156461	-0.859775	-0.137231	-0.984211	-0.00525426	-0.00109464	-0.88733	-0.129914	-1.02359	0.172457	0.0485217	-0.587128	-0.0986992	-0.464848	0	0	O,N,H	0.0594779	0	0	0.0163306	-0.778078	-0.121948	-0.824217	-0.00525426	0	0	-0.00109464	-0.88733	-0.137231	-1.03091	0.172457	0	0	0.0485217	-0.587128	-0.0986992	-0.464848
NOX	NO2	EUW	0.00534846	0		0.00236865	-0.408163	-0.0651482	-0.465594	-0.000445267	-0.00418302	-0.302979	-0.0612463	-0.368853	-0.110081	0.0377456	-0.21384	-0.0359475	-0.322122	0	0	O,N,H	-0.0350592	0	0	0.0119771	-0.308327	-0.054114	-0.385523	-0.110081	0	0	-0.00418302	-0.408163	-0.0651482	-0.587575	0.00534846	0	0	0.0377456	-0.21384	-0.0359475	-0.206693
NOX	NO2	CNS	0.00137444	0		0.089774	-0.879881	-0.14044	-0.929173	0.021986	0.0970973	-0.881059	-0.128996	-0.890972	-0.1717	0.00770118	-0.622501	-0.104645	-0.891145	0	0	O,N,H	-0.0494466	0	0	0.0648575	-0.79448	-0.124694	-0.903764	-0.1717	0	0	0.00770118	-0.881059	-0.14044	-1.1855	0.021986	0	0	0.0970973	-0.622501	-0.104645	-0.608063
NOX	NO2	CNW	0.0017622	0		-0.00239203	-0.566219	-0.0903759	-0.657225	0.00448152	-0.000576514	-0.455324	-0.0920423	-0.543461	-0.228713	-0.0416849	-0.309424	-0.0520157	-0.631838	0	0	O,N,H	-0.0741565	0	0	-0.0148845	-0.443656	-0.0781446	-0.610841	-0.228713	0	0	-0.0416849	-0.566219	-0.0920423	-0.928659	0.00448152	0	0	-0.000576514	-0.309424	-0.0520157	-0.357535
NOX	NO2	RWS	-0.00173031	0		0.7026	-1.79487	-0.286485	-1.38049	0.480861	0.805912	-2.0976	-0.30711	-1.11793	-0.366272	0.732135	-1.57506	-0.264776	-1.47397	0	0	O,N,H	0.0376197	0	0	0.746882	-1.82251	-0.286123	-1.32413	-0.366272	0	0	0.7026	-2.0976	-0.30711	-2.06838	0.480861	0	0	0.805912	-1.57506	-0.264776	-0.553063
NOX	NO2	RWW	-0.131413	0		0.678746	-1.84848	-0.295041	-1.59618	0.414044	1.07536	-2.17594	-0.439859	-1.1264	-0.300995	0.693985	-1.61566	-0.2716	-1.49427	0	0	O,N,H	-0.00612165	0	0	0.81603	-1.88002	-0.3355	-1.40562	-0.300995	0	0	0.678746	-2.17594	-0.439859	-2.23805	0.414044	0	0	1.07536	-1.61566	-0.2716	-0.397856
NOX	NO2	SHS	-0.0535589	0		0.875302	-3.38053	-0.539577	-3.09836	0	0	0	0	0	0	0	0	0	0	0	0
NOX	NO2	SHW	-0.542647	0		0.971389	-4.17516	-0.666411	-4.41283	0	0	0	0	0	0	0	0	0	0	0	0
NOX	NO2	WDS	-0.007965	0		0.554941	-1.78791	-0.285374	-1.52631	0.329964	0.565214	-1.70323	-0.24937	-1.05742	-0.273518	0.521221	-1.28903	-0.216693	-1.25802	0	0	O,N,H	0.0161605	0	0	0.547125	-1.59339	-0.250479	-1.28058	-0.273518	0	0	0.521221	-1.78791	-0.285374	-1.82558	0.329964	0	0	0.565214	-1.28903	-0.216693	-0.610547
NOX	NO2	WDW	-0.1554	0		0.532664	-1.82373	-0.291091	-1.73756	0.277728	0.717407	-1.58722	-0.320852	-0.912938	-0.264517	0.464791	-1.18329	-0.198916	-1.18193	0	0	O,N,H	-0.0473964	0	0	0.571621	-1.53141	-0.270286	-1.27747	-0.264517	0	0	0.464791	-1.82373	-0.320852	-1.94431	0.277728	0	0	0.717407	-1.18329	-0.198916	-0.387066
CO	CO	EUS	-0.00568883	0		0.00716433	0.123509	0.0197137	0.144699	0.000653495	0.00196176	0.094844	0.0138862	0.111345	-0.0417862	0.00427818	0.0652449	0.010968	0.0387048	0	0	O,N,H	-0.0156072	0	0	0.00446809	0.0945327	0.0148559	0.0982496	-0.0417862	0	0	0.00196176	0.0652449	0.010968	0.0363884	0.000653495	0	0	0.00716433	0.123509	0.0197137	0.151041
CO	CO	EUW	-0.00158729	0		0.00724264	0.149012	0.0237842	0.178452	0.000800856	0.00559636	0.112342	0.0227097	0.141449	0.000523738	0.00606091	0.0796914	0.0133965	0.0996725	0	0	O,N,H	-8.75648e-05	0	0	0.00629997	0.113682	0.0199635	0.139858	-0.00158729	0	0	0.00559636	0.0796914	0.0133965	0.0970969	0.000800856	0	0	0.00724264	0.149012	0.0237842	0.18084
CO	CO	CNS	-0.0045216	0		0.0120725	0.122427	0.0195409	0.149519	0.000748024	0.00616575	0.0875882	0.0128238	0.107326	-0.0198833	-0.00422226	0.0573546	0.00964159	0.0428907	0	0	O,N,H	-0.00788561	0	0	0.00467201	0.0891232	0.0140021	0.0999117	-0.0198833	0	0	-0.00422226	0.0573546	0.00964159	0.0428907	0.000748024	0	0	0.0120725	0.122427	0.0195409	0.154788
CO	CO	CNW	-0.00170836	0		0.0108146	0.147725	0.0235789	0.18041	0.00097973	0.00778751	0.110868	0.0224116	0.142047	0.00124383	-0.00333306	0.0749445	0.0125985	0.0854538	0	0	O,N,H	0.000171736	0	0	0.00508967	0.111179	0.0195297	0.13597	-0.00170836	0	0	-0.00333306	0.0749445	0.0125985	0.0825016	0.00124383	0	0	0.0108146	0.147725	0.0235789	0.183363
CO	CO	RWS	-0.0212868	0		0.0207345	0.12957	0.020681	0.149699	-0.00242343	0.0175235	0.0935277	0.0136934	0.122321	0.022211	0.0173682	0.0636367	0.0106976	0.113914	0	0	O,N,H	-0.00049975	0	0	0.0185421	0.0955781	0.015024	0.128644	-0.0212868	0	0	0.0173682	0.0636367	0.0106976	0.0704158	0.022211	0	0	0.0207345	0.12957	0.020681	0.193196
CO	CO	RWW	-0.011684	0		0.0221816	0.149568	0.0238731	0.183939	0.00251488	0.0197561	0.111343	0.0225077	0.156122	0.0154535	0.0102858	0.077843	0.0130858	0.116668	0	0	O,N,H	0.00209479	0	0	0.0174079	0.112918	0.0198222	0.152243	-0.011684	0	0	0.0102858	0.077843	0.0130858	0.0895306	0.0154535	0	0	0.0221816	0.149568	0.0238731	0.211077
CO	CO	SHS	0.00331086	0		0.0743653	0.0869565	0.0138794	0.178512	0	0	0	0	0	0	0	0	0	0	0	0
CO	CO	SHW	0.0201278	0		0.0567463	0.176991	0.0282501	0.282115	0	0	0	0	0	0	0	0	0	0	0	0
CO	CO	WDS	-0.0162755	0		0.0178877	0.127462	0.0203446	0.149419	-0.00145314	0.0138237	0.0920603	0.0134786	0.117909	0.0133654	0.0134313	0.062656	0.0105328	0.0999855	0	0	O,N,H	-0.00145442	0	0	0.0150475	0.0940595	0.0147853	0.122438	-0.0162755	0	0	0.0134313	0.062656	0.0105328	0.0703446	0.0133654	0	0	0.0178877	0.127462	0.0203446	0.17906
CO	CO	WDW	-0.00804737	0		0.0178457	0.14897	0.0237775	0.182546	0.00194423	0.0152626	0.111253	0.0224894	0.150949	0.0113349	0.00678221	0.0772184	0.0129808	0.108316	0	0	O,N,H	0.00174391	0	0	0.0132968	0.11248	0.0197492	0.14727	-0.00804737	0	0	0.00678221	0.0772184	0.0129808	0.0889341	0.0113349	0	0	0.0178457	0.14897	0.0237775	0.201928
VOC	C	EUS	-0.077388	0		0.0602521	0.64862	0.103528	0.735012	0.0120401	0.0409872	0.392273	0.0574329	0.502733	-0.960787	0.118651	0.442595	0.0744025	-0.325138	0	0	O,N,H	-0.342045	0	0	0.0732969	0.494496	0.0784545	0.304203	-0.960787	0	0	0.0409872	0.392273	0.0574329	-0.470094	0.0120401	0	0	0.118651	0.64862	0.103528	0.88284
VOC	C	EUW	-0.0349054	0		0.061506	0.168278	0.0268593	0.221738	0.0121634	0.0410332	0.286306	0.0578758	0.397378	-0.568097	0.197673	0.349882	0.0588169	0.0382749	0	0	O,N,H	-0.196946	0	0	0.100071	0.268155	0.0478507	0.21913	-0.568097	0	0	0.0410332	0.168278	0.0268593	-0.331927	0.0121634	0	0	0.197673	0.349882	0.0588169	0.618536
VOC	C	CNS	-0.059364	0		0.219689	0.29883	0.0476972	0.506852	-0.0978504	0.1751	0.204688	0.0299685	0.311906	-0.613496	0.00856408	0.321495	0.054045	-0.229392	0	0	O,N,H	-0.256904	0	0	0.134451	0.275005	0.0439035	0.196455	-0.613496	0	0	0.00856408	0.204688	0.0299685	-0.370276	-0.059364	0	0	0.219689	0.321495	0.054045	0.535865
VOC	C	CNW	-0.035679	0		0.0876602	0.0158441	0.00252893	0.0703543	0.0045072	0.0850548	0.290826	0.0587897	0.439178	-1.97734	-0.0410614	0.469017	0.0788441	-1.47054	0	0	O,N,H	-0.669504	0	0	0.0438846	0.258563	0.0467209	-0.320336	-1.97734	0	0	-0.0410614	0.0158441	0.00252893	-2.00003	0.0045072	0	0	0.0876602	0.469017	0.0788441	0.640029
VOC	C	RWS	-0.332033	0		0.430627	0.775393	0.123763	0.997749	-0.255742	0.138423	0.329284	0.0482107	0.260176	0.264378	0.33861	0.373946	0.0628622	1.0398	0	0	O,N,H	-0.107799	0	0	0.302553	0.492874	0.0782785	0.765907	-0.332033	0	0	0.138423	0.329284	0.0482107	0.183885	0.264378	0	0	0.430627	0.775393	0.123763	1.59416
VOC	C	RWW	-0.297156	0		0.431818	0.742584	0.118526	0.995772	-0.491761	0.108308	0.417495	0.0843953	0.118437	0.356635	0.0567195	0.54689	0.091935	1.05218	0	0	O,N,H	-0.144094	0	0	0.198948	0.56899	0.0982855	0.72213	-0.491761	0	0	0.0567195	0.417495	0.0843953	0.0668493	0.356635	0	0	0.431818	0.742584	0.118526	1.64956
VOC	C	SHS	0.00485819	0		0.00322783	1.23252	0.196726	1.43733	0	0	0	0	0	0	0	0	0	0	0	0
VOC	C	SHW	0.0104886	0		0.0231352	0.975682	0.155732	1.16504	0	0	0	0	0	0	0	0	0	0	0	0
VOC	C	WDS	-0.265944	0		0.367278	0.682322	0.108907	0.892563	-0.222762	0.136968	0.318875	0.0466867	0.279768	0.144764	0.301949	0.371666	0.062479	0.880858	0	0	O,N,H	-0.114647	0	0	0.268732	0.457621	0.072691	0.684396	-0.265944	0	0	0.136968	0.318875	0.0466867	0.236586	0.144764	0	0	0.367278	0.682322	0.108907	1.30327
VOC	C	WDW	-0.221955	0		0.330862	0.545727	0.0871051	0.741739	-0.379949	0.100122	0.388778	0.0785902	0.187541	-0.0262528	0.0498223	0.525662	0.0883665	0.637598	0	0	O,N,H	-0.209386	0	0	0.160269	0.486722	0.0846873	0.522293	-0.379949	0	0	0.0498223	0.388778	0.0785902	0.137241	-0.0262528	0	0	0.330862	0.545727	0.0883665	0.938703
BC	C	EUS	0.250022	6.58707e-05	-0.114076	0	0	0	0.136012	6.13024	0	0	0	6.13024	-12.0165	0	0	0	-12.0165	0.0178405	0.0178405	O,N,H	-1.87875	6.58707e-05	-0.114076	0	0	0	-1.99276	-12.0165	6.58707e-05	-0.114076	0	0	0	-12.1305	6.13024	6.58707e-05	-0.114076	0	0	0	6.01623
BC	C	EUW	0.0749115	3.21023e-06	-0.00696797	0	0	0	0.0679468	1.4907	0	0	0	1.4907	-1.12546	0	0	0	-1.12546	0.0172858	0.0172858	O,N,H	0.146717	3.21023e-06	-0.00696797	0	0	0	0.139752	-1.12546	3.21023e-06	-0.00696797	0	0	0	-1.13242	1.4907	3.21023e-06	-0.00696797	0	0	0	1.48373
BC	C	CNS	14.3612	0.00511918	-8.304	0	0	0	6.06229	23.2028	0	0	0	23.2028	-10.5148	0	0	0	-10.5148	0.047241	0.047241	O,N,H	9.0164	0.00511918	-8.304	0	0	0	0.717512	-10.5148	0.00511918	-8.304	0	0	0	-18.8137	23.2028	0.00511918	-8.304	0	0	0	14.9039
BC	C	CNW	0.118323	6.53548e-06	0.004599	0	0	0	0.122928	3.95044	0	0	0	3.95044	-8.98202	0	0	0	-8.98202	0.0174778	0.0174778	O,N,H	-1.63775	6.53548e-06	0.004599	0	0	0	-1.63315	-8.98202	6.53548e-06	0.004599	0	0	0	-8.97741	3.95044	6.53548e-06	0.004599	0	0	0	3.95505
BC	C	RWS	26.5483	0.641715	-14.2901	0	0	0	12.9	54.8036	0	0	0	54.8036	24.2001	0	0	0	24.2001	3.55455	3.55455	O,N,H	35.184	0.641715	-14.2901	0	0	0	21.5357	24.2001	0.641715	-14.2901	0	0	0	10.5517	54.8036	0.641715	-14.2901	0	0	0	41.1553
BC	C	RWW	22.8994	0.0740529	-8.58353	0	0	0	14.3899	47.4926	0	0	0	47.4926	33.6835	0	0	0	33.6835	4.84805	4.84805	O,N,H	34.6918	0.0740529	-8.58353	0	0	0	26.1824	22.8994	0.0740529	-8.58353	0	0	0	14.3899	47.4926	0.0740529	-8.58353	0	0	0	38.9832
BC	C	SHS	12.2736	0.496556	-5.09308	0	0	0	7.67707	0	0	0	0	0	0	0	0	0	0	0	0				-5.09308							-5.09308							-5.09308
BC	C	SHW	9.76617	0.343403	-2.46898	0	0	0	7.64059	0	0	0	0	0	0	0	0	0	0	0	0				-2.46898							-2.46898							-2.46898
BC	C	WDS	21.9741	0.460767	-11.9052	0	0	0	10.5297	44.4884	0	0	0	44.4884	13.2885	0	0	0	13.2885	2.53963	2.53963	O,N,H	26.5837	0.460767	-11.9052	0	0	0	15.1393	13.2885	0.460767	-11.9052	0	0	0	1.84413	44.4884	0.460767	-11.9052	0	0	0	33.044
BC	C	WDW	14.0547	0.0516087	-4.27703	0	0	0	9.82925	30.4684	0	0	0	30.4684	16.7784	0	0	0	16.7784	2.98093	2.98093	O,N,H	20.4338	0.0516087	-4.27703	0	0	0	16.2084	14.0547	0.0516087	-4.27703	0	0	0	9.82925	30.4684	0.0516087	-4.27703	0	0	0	26.243
OC	C	EUS	-0.000270485	0		0	0	0	-0.000270485	-0.148963	0	0	0	-0.148963	0.195638	0	0	0	0.195638	-0.00834735	-0.00834735	O,N,H	0.0154682	0	0	0	0	0	0.0154682	-0.148963	0	0	0	0	0	-0.148963	0.195638	0	0	0	0	0	0.195638
OC	C	EUW	-0.000215893	0		0	0	0	-0.000215893	-0.00880447	0	0	0	-0.00880447	-2.23716	0	0	0	-2.23716	-0.00481602	-0.00481602	O,N,H	-0.748727	0	0	0	0	0	-0.748727	-2.23716	0	0	0	0	0	-2.23716	-0.000215893	0	0	0	0	0	-0.000215893
OC	C	CNS	-0.0338049	0		0	0	0	-0.0338049	-1.2224	0	0	0	-1.2224	2.42593	0	0	0	2.42593	-0.000291853	-0.000291853	O,N,H	0.389909	0	0	0	0	0	0.389909	-1.2224	0	0	0	0	0	-1.2224	2.42593	0	0	0	0	0	2.42593
OC	C	CNW	0.000451314	0		0	0	0	0.000451314	-0.0474709	0	0	0	-0.0474709	1.72515	0	0	0	1.72515	1.44435e-05	1.44435e-05	O,N,H	0.559376	0	0	0	0	0	0.559376	-0.0474709	0	0	0	0	0	-0.0474709	1.72515	0	0	0	0	0	1.72515
OC	C	RWS	-1.2342	0		0	0	0	-1.2342	-9.2145	0	0	0	-9.2145	-4.05346	0	0	0	-4.05346	-0.145426	-0.145426	O,N,H	-4.83405	0	0	0	0	0	-4.83405	-9.2145	0	0	0	0	0	-9.2145	-1.2342	0	0	0	0	0	-1.2342
OC	C	RWW	-1.35832	0		0	0	0	-1.35832	-11.376	0	0	0	-11.376	-2.24824	0	0	0	-2.24824	-0.117143	-0.117143	O,N,H	-4.99419	0	0	0	0	0	-4.99419	-11.376	0	0	0	0	0	-11.376	-1.35832	0	0	0	0	0	-1.35832
OC	C	SHS	-0.404578	0		0	0	0	-0.404578	0	0	0	0	0	0	0	0	0	0	0	0
OC	C	SHW	-0.575298	0		0	0	0	-0.575298	0	0	0	0	0	0	0	0	0	0	0	0
OC	C	WDS	-0.94917	0		0	0	0	-0.94917	-7.22973	0	0	0	-7.22973	-2.48865	0	0	0	-2.48865	-0.110876	-0.110876	O,N,H	-3.55585	0	0	0	0	0	-3.55585	-7.22973	0	0	0	0	0	-7.22973	-0.94917	0	0	0	0	0	-0.94917
OC	C	WDW	-0.890674	0		0	0	0	-0.890674	-7.46194	0	0	0	-7.46194	-1.0312	0	0	0	-1.0312	-0.0768284	-0.0768284	O,N,H	-3.12794	0	0	0	0	0	-3.12794	-7.46194	0	0	0	0	0	-7.46194	-0.890674	0	0	0	0	0	-0.890674
NH3	NH3	EUS	0.00904584	0		0	0	0	0.00904584	0	0	0	0	0	0	0	0	0	0	0	0	O	0.00904584	0	0	0	0	0	0.00904584	0.00904584	0	0	0	0	0	0.00904584	0.00904584	0	0	0	0	0	0.00904584
NH3	NH3	EUW	0.00739815	0		0	0	0	0.00739815	0	0	0	0	0	0	0	0	0	0	0	0	O	0.00739815	0	0	0	0	0	0.00739815	0.00739815	0	0	0	0	0	0.00739815	0.00739815	0	0	0	0	0	0.00739815
NH3	NH3	CNS	0.00458491	0		0	0	0	0.00458491	0	0	0	0	0	0	0	0	0	0	0	0	O	0.00458491	0	0	0	0	0	0.00458491	0.00458491	0	0	0	0	0	0.00458491	0.00458491	0	0	0	0	0	0.00458491
NH3	NH3	CNW	0.00435486	0		0	0	0	0.00435486	0	0	0	0	0	0	0	0	0	0	0	0	O	0.00435486	0	0	0	0	0	0.00435486	0.00435486	0	0	0	0	0	0.00435486	0.00435486	0	0	0	0	0	0.00435486
NH3	NH3	RWS	-0.0556386	0		0	0	0	-0.0556386	0	0	0	0	0	0	0	0	0	0	0	0	O	-0.0556386	0	0	0	0	0	-0.0556386	-0.0556386	0	0	0	0	0	-0.0556386	-0.0556386	0	0	0	0	0	-0.0556386
NH3	NH3	RWW	-0.0104672	0		0	0	0	-0.0104672	0	0	0	0	0	0	0	0	0	0	0	0	O	-0.0104672	0	0	0	0	0	-0.0104672	-0.0104672	0	0	0	0	0	-0.0104672	-0.0104672	0	0	0	0	0	-0.0104672
NH3	NH3	WDS	-0.0351375	0		0	0	0	-0.0351375	0	0	0	0	0	0	0	0	0	0	0	0	O	-0.0351375	0	0	0	0	0	-0.0351375	-0.0351375	0	0	0	0	0	-0.0351375	-0.0351375	0	0	0	0	0	-0.0351375
NH3	NH3	WDW	-0.00525797	0		0	0	0	-0.00525797	0	0	0	0	0	0	0	0	0	0	0	0	O	-0.00525797	0	0	0	0	0	-0.00525797	-0.00525797	0	0	0	0	0	-0.00525797	-0.00525797	0	0	0	0	0	-0.00525797
Ship_All	Multiple	SHS	-0.373618	0.00595867	-0.0206754	0.504876	-1.89106	-0.301837	-2.07635	-0.194788	0.502515	-1.73114	-0.253456	-1.67687	-0.750674	0.397121	-1.43488	-0.241211	-2.02965	-0.147205	-0.147205	O,N,H	-0.439694	0.00595867	-0.0206754	0.468171	-1.68569	-0.265501	-1.93743	-0.750674	0.00595867	-0.0206754	0.397121	-1.89106	-0.301837	-2.56116	-0.194788	0.00595867	-0.0206754	0.504876	-1.43488	-0.241211	-1.38072
Ship_All	Multiple	SHW	-0.876733	0.00412084	-0.0101893	0.55967	-2.34546	-0.374366	-3.04296	-1.05537	0.519299	-2.12469	-0.429499	-3.09026	-0.688088	0.502779	-1.7915	-0.30116	-2.27797	-0.252289	-0.252289	O,N,H	-0.873398	0.00412084	-0.0101893	0.527249	-2.08722	-0.368342	-2.80777	-1.05537	0.00412084	-0.0101893	0.502779	-2.34546	-0.429499	-3.33362	-0.688088	0.00412084	-0.0101893	0.55967	-1.7915	-0.30116	-2.22715
CH4	CH4	Summer	-0.0253333	0		0.325177	2.03728	0	2.33713	0.00152931	0.201957	1.37939	0	1.58287	0.108883	0.20267	1.20561	0	1.51717	0	0	O,N,H	-0.000177999	0	0	0.252679	1.50298	0	1.75548	-0.0857909	0	0	0.201957	1.20561	0	1.32178	0.108883	0	0	0.325177	2.03728	0	2.47134
CH4	CH4	Winter	0	0		0	0	0	0	-0.0857909	0.280912	1.38964	0	1.58476	0	0	0	0	0	0	0			0	0						0	0						0	0
