# Supplementary material for: Regional and seasonal radiative forcing by perturbations to aerosol and ozone precursor emissions
Source: Copernicus journal article supplement (doi:10.5194/acp-2016-310), 2016-04-27
Supplement: Supplementary file 11 [file eclipse_t4-3_results_oslonitr_final.xlsx]

## Sheet: OsloCTM2
ECLIPSE T4.3 Radiative Forcing Simulations (Absolute RF in mWm-2, Normalised RF in mWm-2 Tg[species]-1)											Perturbation codes: EUS Europe Summer, EUW Europe Winter, CNS China Summer, CNW China Winter, RWS Rest of the World Summer, RWW Rest of the World Winter, SHS Shipping Summer, SHW Shipping Winter, WDS World Summer, WDW World Winter
Model:		OsloCTM2
	Perturb	ADRF SU	ADRF NI	ADRF SOA	ADRF BC	ADRF OC	AIRF	BC_SNOW	SW O3	LW O3	CH4	PM O3	Total RF	DeltaEmi	nADRF SU	nADRF NI	nADRF SOA	nADRF BC	nADRF OC	nAIRF	nBC_SNOW	nSW O3	nLW O3	nCH4	nPM O3	Total nRF	Total SLnRF	Total LLnRF					ADRF NI/ADRF TOT			ADRF NI/AD+IRF TOT
SO2	EUS	-3.61535	0.179366				-1.2446						-4.68058	0.768	-4.70749	0.233549	0	0	0	-1.62057		0	0	0	0	-6.09451	-6.09451	0					-0.0496123			-0.036907
	EUW	-1.37443	0.138568				-0.357887						-1.59375	0.83	-1.65594	0.166949	0	0	0	-0.431189		0	0	0	0	-1.92018	-1.92018	0					-0.100819			-0.07999
	CNS	-10.46	0.634041				-4.10958						-13.9355	3.149	-3.32169	0.201347	0	0	0	-1.30504		0	0	0	0	-4.42539	-4.42539	0					-0.0606158			-0.0435181
	CNW	-4.95254	0.690153				-3.13379						-7.39618	3.317	-1.49308	0.208065	0	0	0	-0.944766		0	0	0	0	-2.22978	-2.22978	0					-0.139353			-0.0853481
	RWS	-23.0093	0.941842				-14.8586						-36.9261	5.156	-4.46263	0.182669	0	0	0	-2.88181		0	0	0	0	-7.16176	-7.16176	0					-0.0409331			-0.0248718
	RWW	-15.7201	1.08076				-12.6266						-27.2659	5.15	-3.05245	0.209856	0	0	0	-2.45177		0	0	0	0	-5.29436	-5.29436	0					-0.0687502			-0.0381265
	SHS	-2.94903	0.0452939				-7.30354						-10.2073	1.048	-2.81396	0.0432194	0	0	0	-6.96903		0	0	0	0	-9.73977	-9.73977	0					-0.0153589			-0.00441781
	SHW	-2.16948	0.0538041				-4.63413						-6.74981	1.031	-2.10425	0.0521863	0	0	0	-4.49479		0	0	0	0	-6.54685	-6.54685	0					-0.0248005			-0.00790817
	WDS	-40.0337	1.80054				-27.5163						-65.7495	10.121	-3.95551	0.177902	0	0	0	-2.71874		0	0	0	0	-6.49634	-6.49634	0					-0.0449757			-0.026655
	WDW	-24.2166	1.96329				-20.7524						-43.0057	10.328	-2.34475	0.190093	0	0	0	-2.00933		0	0	0	0	-4.16399	-4.16399	0					-0.081072			-0.0436587
NOX	EUS	-0.168353	-0.186243				-0.0934662		0.174556	0.323164	-0.84	-0.288502	-1.07884	0.977	-0.172316	-0.190627	0	0	0	-0.0956665		0.178665	0.330772	-0.859775	-0.295294	-1.10424	0.0508268	-1.15507					1.10626			0.711342
[NO2]	EUW	-0.0383416	-0.25185				-0.0378026		0.0872018	0.113639	-0.42	-0.144251	-0.691404	1.029	-0.037261	-0.244752	0	0	0	-0.0367372		0.0847442	0.110436	-0.408163	-0.140186	-0.671919	-0.12357	-0.548349					6.56858			3.30754
	CNS	-0.174963	-0.296734				-0.0467271		0.513775	1.34206	-1.78	-0.61135	-1.05394	2.023	-0.0864869	-0.14668	0	0	0	-0.0230979		0.253967	0.663401	-0.879881	-0.3022	-0.520978	0.661103	-1.18208					1.69598			1.33851
	CNW	-0.0232421	-1.4384				-0.135289		0.231822	0.446021	-1.18	-0.405277	-2.50436	2.084	-0.0111526	-0.690211	0	0	0	-0.0649179		0.111239	0.214022	-0.566219	-0.194471	-1.20171	-0.441021	-0.760689					61.8877			9.0733
	RWS	-0.642803	-0.802886				-0.151135		2.38695	6.38733	-11.41	-3.91882	-8.15136	6.357	-0.101117	-0.1263	0	0	0	-0.0237746		0.375484	1.00477	-1.79487	-0.616457	-1.28227	1.12906	-2.41133					1.24904			1.01127
	RWW	-0.629027	-1.75795				-0.121896		1.71469	4.50127	-11.76	-4.03903	-12.0919	6.362	-0.0988725	-0.27632	0	0	0	-0.01916		0.269521	0.707524	-1.84848	-0.634868	-1.90065	0.582692	-2.48334					2.79471			2.34105
	SHS	0.323347	-0.057256				-0.637228		0.86977	2.2927	-5.73	-1.968	-4.90666	1.695	0.190765	-0.0337794	0	0	0	-0.375946		0.513139	1.35263	-3.38053	-1.16106	-2.89479	1.6468	-4.54159					-0.177073			0.182413
	SHW	0.34702	-0.108226				-0.362094		0.763206	1.99811	-6.96	-2.39045	-6.71243	1.667	0.20817	-0.0649226	0	0	0	-0.217213		0.457832	1.19863	-4.17516	-1.43398	-4.02665	1.58249	-5.60915					-0.311873			7.17965
	WDS	-0.662772	-1.34312				-0.928556		3.94505	10.3453	-19.76	-6.78667	-15.1908	11.052	-0.0599685	-0.121527	0	0	0	-0.084017		0.356954	0.936053	-1.78791	-0.614067	-1.37449	1.02749	-2.40198					2.02652			0.844024
	WDW	-0.343591	-3.55643				-0.657082		2.79692	7.05904	-20.32	-6.979	-22.0001	11.142	-0.0308374	-0.319191	0	0	0	-0.0589734		0.251025	0.633552	-1.82373	-0.626369	-1.97452	0.475575	-2.4501					10.3508			3.55404
CO	EUS	0.0142315	-0.000551798	0.00104744			-0.0229176		0.019997	0.0757438	0.29	0.0996019	0.477152	2.348	0.00606112	-0.000235008	0.000446099	0	0	-0.00976048		0.00851661	0.0322589	0.123509	0.0424199	0.203216	0.0372872	0.165929					-0.0361149			0.0722375
	EUW	0.00843539	-0.000740775	-1.74407e-06			-0.0374502		0.0231316	0.0818698	0.46	0.157989	0.693233	3.087	0.00273255	-0.000239966	-5.64972e-07	0	0	-0.0121316		0.00749323	0.0265208	0.149012	0.0511789	0.224565	0.0243745	0.200191					-0.0878357			0.0255294
	CNS	0.0658304	-0.0132679	0.00645698			-0.118048		0.13388	0.662324	1.57	0.539224	2.8464	12.824	0.00513337	-0.00103461	0.000503507	0	0	-0.00920524		0.0104398	0.0516472	0.122427	0.042048	0.221959	0.0574841	0.164475					-0.183544			0.289941
	CNW	0.0678868	-0.0131327	0.00423858			-0.181701		0.142068	0.597248	2.51	0.862072	3.98868	16.991	0.00399546	-0.000772921	0.00024946	0	0	-0.010694		0.00836137	0.0351508	0.147725	0.050737	0.234752	0.0362903	0.198462					-0.182082			0.119851
	RWS	0.0013761	-0.00216866	0.0185693			-0.593781		0.362823	2.12853	4.54	1.55928	8.01463	35.039	3.92734e-05	-6.18927e-05	0.000529961	0	0	-0.0169463		0.0103548	0.0607475	0.12957	0.0445014	0.228735	0.0546633	0.174071					-0.10873			0.00377924
	RWW	0.0585582	-0.00151742	0.0162467			-0.54173		0.315001	1.65028	5.25	1.80314	8.54998	35.101	0.00166828	-4.32301e-05	0.000462856	0	0	-0.0154335		0.00897413	0.0470152	0.149568	0.05137	0.243582	0.0426438	0.200938					-0.020285			0.00324981
	SHS	0.000966525	-0.000377744	-0.000574135					0.00226008	0.0111564	0.01	0.00343455	0.0268657	0.115	0.00840457	-0.00328473	-0.00499248	0	0	0		0.0196529	0.0970122	0.0869565	0.0298656	0.233615	0.116792	0.116822					-0.962675			-0.962675
	SHW	0.0012801	-4.37071e-05	6.21369e-05					-0.000291259	0.00096216	0.02	0.0068691	0.0288385	0.113	0.0113283	-0.000386788	0.000549884	0	0	0		-0.00257751	0.00851469	0.176991	0.0607885	0.255208	0.0174286	0.23778					-0.0325629			-0.0325629
	WDS	0.0824045	-0.0163661	0.0254996			-0.734747		0.51896	2.87775	6.41	2.20155	11.3651	50.326	0.00163741	-0.000325202	0.000506688	0	0	-0.0145997		0.010312	0.0571823	0.12737	0.0437457	0.225829	0.0547134	0.171115					-0.151673			0.0261088
	WDW	0.13616	-0.0154346	0.0205457			-0.760881		0.479909	2.33036	8.24	2.83007	13.2607	55.292	0.00246257	-0.000279147	0.000371585	0	0	-0.0137611		0.00867954	0.0421464	0.149027	0.051184	0.239831	0.0396198	0.200211					-0.0984939			0.0255466
VOC	EUS	-0.0113196	0.00687073	-0.0890058			-0.0361196		0.051572	0.120768	0.13	0.0446491	0.217415	0.200426	-0.0564778	0.0342807	-0.444084	0	0	-0.180215		0.257313	0.602558	0.64862	0.222772	1.08477	0.213375	0.871392					-0.0684845			-0.0503553
[C]	EUW	-0.018858	-0.000584327	-0.0787026			-0.0367697		0.0841109	0.155404	0.04	0.0137382	0.158338	0.237702	-0.0793346	-0.00245823	-0.331098	0	0	-0.154688		0.35385	0.653776	0.168278	0.0577958	0.666121	0.440048	0.226074					0.00598937			0.00434993
VOC->C:	CNS	1.9852e-05	0.00395275	-0.191356			-0.0474657		0.152664	0.58965	0.15	0.0515182	0.708983	0.501957	3.95492e-05	0.00787467	-0.38122	0	0	-0.0945612		0.304137	1.1747	0.29883	0.102635	1.41244	1.01097	0.401465					-0.0206587			-0.0165524
0.255319	CNW	-0.0689635	0.0668409	-0.231504			0.0181283		0.182746	0.458275	0.01	0.00343455	0.438957	0.631149	-0.109267	0.105904	-0.366798	0	0	0.0287227		0.289545	0.726096	0.0158441	0.00544174	0.695489	0.674203	0.0212859					-0.222456			-0.23674
	RWS	-0.0781143	0.0213681	-1.3301			-0.473547		0.51189	2.4403	1.66	0.570135	3.32193	2.14085	-0.0364875	0.00998112	-0.621295	0	0	-0.221196		0.239106	1.13987	0.775393	0.266312	1.55169	0.509983	1.0417					-0.0151739			-0.0113554
	RWW	0.0135512	0.0680975	-1.20617			-0.413429		0.529125	1.98451	1.6	0.549528	3.12521	2.15464	0.00628932	0.0316051	-0.559802	0	0	-0.191879		0.245575	0.921041	0.742584	0.255044	1.45046	0.45283	0.997628					-0.0570991			-0.0424007
	SHS	0.00204246	-0.000198442	-0.00431817					0.0156966	0.0541764	0.09	0.0309109	0.18831	0.0730213	0.0279708	-0.00271759	-0.0591358	0	0	0		0.214959	0.741926	1.23252	0.423314	2.57883	0.923003	1.65583					0.0872			0.0872
	SHW	0.00156672	-0.000282773	-0.00351059					0.019644	0.0466433	0.07	0.0240418	0.158102	0.0717447	0.0218374	-0.00394138	-0.0489317	0	0	0		0.273804	0.650129	0.975682	0.335103	2.20368	0.892898	1.31078					0.145469			0.145469
	WDS	-0.0873716	0.0319931	-1.61478			-0.557132		0.731823	3.20489	2.03	0.697213	4.43664	2.91626	-0.0299602	0.0109706	-0.553717	0	0	-0.191044		0.250946	1.09898	0.696098	0.239078	1.52135	0.586172	0.935176					-0.0187957			-0.0141607
	WDW	-0.0727036	0.134071	-1.51989			-0.43207		0.815626	2.64483	1.72	0.590742	3.88061	3.09523	-0.0234889	0.0433154	-0.491041	0	0	-0.139592		0.26351	0.854485	0.555693	0.190855	1.25374	0.507189	0.746548					-0.0841844			-0.0662191
BC	EUS				2.03902		-0.0542051	0.065					2.04981	0.03	0	0	0	67.9673	0	-1.80684	2.16667	0	0	0	0	68.3272	68.3272	0					0			0
[C]	EUW				1.51818		-0.0270773	0.8					2.2911	0.047	0	0	0	32.3017	0	-0.576113	17.0213	0	0	0	0	48.7469	48.7469	0					0			0
	CNS				7.23226		-0.120915	0.11					7.22135	0.11	0	0	0	65.7478	0	-1.09923	1	0	0	0	0	65.6486	65.6486	0					0			0
	CNW				4.56071		-0.120359	0.89					5.33035	0.177	0	0	0	25.7667	0	-0.679994	5.02825	0	0	0	0	30.115	30.115	0					0			0
	RWS				27.8952		-0.974707	0.48					27.4005	0.351	0	0	0	79.4735	0	-2.77694	1.36752	0	0	0	0	78.0641	78.0641	0					0			0
	RWW				21.6317		-0.966977	2.4					23.0647	0.359	0	0	0	60.2554	0	-2.69353	6.68524	0	0	0	0	64.2471	64.2471	0					0			0
	SHS				0.581287		-0.0682473	0.023					0.53604	0.012	0	0	0	48.4406	0	-5.68727	1.91667	0	0	0	0	44.67	44.67	0					0			0
	SHW				0.422105		-0.0453474	0.11					0.486758	0.012	0	0	0	35.1754	0	-3.77895	9.16667	0	0	0	0	40.5631	40.5631	0					0			0
	WDS				37.7478		-1.21807	0.678					37.2077	0.503	0	0	0	75.0453	0	-2.42162	1.34791	0	0	0	0	73.9716	73.9716	0					0			0
	WDW				28.1327		-1.15976	4.2					31.1729	0.595	0	0	0	47.2818	0	-1.94918	7.05882	0	0	0	0	52.3915	52.3915	0					0			0
OC	EUS					-0.294967	-0.0863795						-0.381346	0.037	0	0	0	0	-7.97208	-2.33458		0	0	0	0	-10.3067	-10.3067	0					0			0
[C]	EUW					-0.19485	-0.0452268						-0.240077	0.067	0	0	0	0	-2.90821	-0.675027		0	0	0	0	-3.58324	-3.58324	0					0			0
	CNS					-0.81498	-0.225029						-1.04001	0.212	0	0	0	0	-3.84425	-1.06146		0	0	0	0	-4.9057	-4.9057	0					0			0
	CNW					-1.11945	-0.226343						-1.34579	0.366	0	0	0	0	-3.05861	-0.618423		0	0	0	0	-3.67703	-3.67703	0					0			0
	RWS					-4.43572	-2.92849						-7.36421	0.804	0	0	0	0	-5.51706	-3.6424		0	0	0	0	-9.15947	-9.15947	0					0			0
	RWW					-5.2261	-3.03832						-8.26442	0.825	0	0	0	0	-6.33467	-3.68281		0	0	0	0	-10.0175	-10.0175	0					0			0
	SHS					-0.0604206							-0.0604206	0.013	0	0	0	0	-4.64774	0		0	0	0	0	-4.64774	-4.64774	0					0			0
	SHW					-0.0453474							-0.0453474	0.013	0	0	0	0	-3.48826	0		0	0	0	0	-3.48826	-3.48826	0					0			0
	WDS					-5.60609	-3.2399						-8.84599	1.066	0	0	0	0	-5.25899	-3.0393		0	0	0	0	-8.2983	-8.2983	0					0			0
	WDW					-6.58575	-3.30989						-9.89564	1.271	0	0	0	0	-5.18155	-2.60416		0	0	0	0	-7.78571	-7.78571	0					0			0
NH3	EUS	0.00127255	-0.380982				-0.148476						-0.528185	0.388	0.00327977	-0.981912	0	0	0	-0.38267		0	0	0	0	-1.3613	-1.3613	0					-299.385			2.58813
	EUW	-7.75717e-05	-0.2945				-0.0462159						-0.340793	0.384	-0.00020201	-0.766927	0	0	0	-0.120354		0	0	0	0	-0.887483	-0.887483	0					3796.49			6.36159
	CNS	0.00551383	-0.816205				-0.0919379						-0.902629	1.365	0.00403944	-0.597952	0	0	0	-0.0673538		0	0	0	0	-0.661267	-0.661267	0					-148.029			9.44419
	CNW	0.00342746	-1.59884				-0.118439						-1.71385	1.351	0.00253698	-1.18345	0	0	0	-0.0876677		0	0	0	0	-1.26858	-1.26858	0					-466.48			13.9016
	RWS	0.0126846	-1.53768				-0.280553						-1.80555	3.481	0.00364395	-0.441735	0	0	0	-0.0805955		0	0	0	0	-0.518687	-0.518687	0					-121.224			5.74043
	RWW	0.0225162	-2.50378				-0.291866						-2.77313	3.426	0.00657215	-0.730817	0	0	0	-0.0851915		0	0	0	0	-0.809437	-0.809437	0					-111.199			9.29564
	WDS	0.019471	-2.73487				-0.520967						-3.23636	5.234	0.0037201	-0.522519	0	0	0	-0.0995351		0	0	0	0	-0.618335	-0.618335	0					-140.459			5.45342
	WDW	0.0258661	-4.39712				-0.456521						-4.82777	5.161	0.00501184	-0.85199	0	0	0	-0.0884559		0	0	0	0	-0.935434	-0.935434	0					-169.996			10.2103
All	SHS	-2.62267	-0.0125383	-0.0048923	0.581287	-0.0600225	-8.00902	0.023	0.877	2.356	-5.59	-1.91991	-14.3818	2.95602	-0.887231	-0.00424161	-0.00165503	0.196645	-0.0203052	-2.70939	0.00778073	0.296683	0.797017	-1.89106	-0.649492	-4.86525	-2.3247	-2.54055					0.00595275			0.00123953
	SHW	-1.81961	-0.0547484	-0.00344845	0.422105	-0.0453474	-5.04157	0.11	0.773	2.06	-6.82	-2.34236	-12.762	2.90774	-0.625782	-0.0188285	-0.00118595	0.145166	-0.0155954	-1.73384	0.03783	0.265842	0.708453	-2.34546	-0.80556	-4.38896	-1.23794	-3.15102					0.037854			0.00843857
CH4	Annual	-1.6724	0.022694	0.097901					7.7243	35.1371	124.795		166.104	61.2556	-0.027302	0.000370481	0.00159824	0	0	0		0.1261	0.573615	2.03728	0	2.71166	0.674381	2.03728					-0.0144135			-0.0144135
	Winter

## Sheet: NorESM
ECLIPSE T4.3 Radiative Forcing Simulations (Absolute RF in mWm-2, Normalised RF in mWm-2 Tg[species]-1)											Perturbation codes: EUS Europe Summer, EUW Europe Winter, CNS China Summer, CNW China Winter, RWS Rest of the World Summer, RWW Rest of the World Winter, SHS Shipping Summer, SHW Shipping Winter, WDS World Summer, WDW World Winter
Model:		NorESM
	Perturb	ADRF	AIRF	SW O3	LW O3	CH4	PM O3	Total RF	DeltaEMI	nADRF	nAIRF	nSW O3	nLW O3	nCH4	nPM O3	Total nRF	Total SLnRF	Total LLnRF				ADRF NI (from TOT and CTM2 ratio)				nADRF NI
SO2	EUS	-3.52057	-3.27348					-6.79405	0.772418	-4.55786	-4.23796	0	0	0	0	-8.79582	-8.79582	0				0.174664				0.226126
	EUW	-1.35908	-1.26156					-2.62064	0.845032	-1.60832	-1.49291	0	0	0	0	-3.10123	-3.10123	0				0.13702				0.162148
	CNS	-13.906	-10.5627					-24.4687	3.14062	-4.42779	-3.36326	0	0	0	0	-7.79105	-7.79105	0				0.842923				0.268394
	CNW	-4.99614	-6.02093					-11.0171	3.35299	-1.49006	-1.79569	0	0	0	0	-3.28575	-3.28575	0				0.696229				0.207644
	RWS	-26.0658	-30.1921					-56.2579	5.09299	-5.11798	-5.92817	0	0	0	0	-11.0461	-11.0461	0				1.06695				0.209495
	RWW	-15.7597	-24.9058					-40.6655	5.16615	-3.05057	-4.82096	0	0	0	0	-7.87153	-7.87153	0				1.08348				0.209727
	SHS							0	1.03896	0	0	0	0	0	0	0	0	0				0				0
	SHW							0	1.03896	0	0	0	0	0	0	0	0	0				0				0
	WDS	-43.4924	-44.0283					-87.5206	9.00603	-4.82925	-4.88876	0	0	0	0	-9.71801	-9.71801	0				1.9561				0.217199
	WDW	-22.1149	-32.1883					-54.3032	9.36417	-2.36165	-3.43739	0	0	0	0	-5.79904	-5.79904	0				1.7929				0.191464
NOX	EUS	-0.115729	-0.181903	0.196334	0.268297	-0.88366	-0.296275	-1.01294	0.995864	-0.11621	-0.182658	0.197149	0.269411	-0.88733	-0.297505	-1.01714	0.167693	-1.18484				-0.128027				-0.128559
[NO2]	EUW	0.0824258	-0.0124583	0.0611712	0.0401649	-0.3214	-0.0915651	-0.241662	1.0608	0.0777015	-0.0117442	0.0576652	0.0378628	-0.302979	-0.0863171	-0.227811	0.161485	-0.389296				0.541421				0.510389
	CNS	0.336275	-0.334238	0.598559	1.44819	-1.77983	-0.596744	-0.327788	2.0201	0.166464	-0.165456	0.296301	0.71689	-0.881059	-0.295403	-0.162263	1.0142	-1.17646				0.570316				0.28232
	CNW	0.259955	-0.127795	0.16754	0.305877	-0.96133	-0.273878	-0.629631	2.11131	0.123125	-0.0605288	0.0793536	0.144875	-0.455324	-0.129719	-0.298218	0.286825	-0.585043				16.088				7.61992
	RWS	0.117021	1.8281	3.0894	7.92391	-13.1557	-4.41085	-4.60809	6.27179	0.0186583	0.29148	0.492587	1.26342	-2.0976	-0.703285	-0.734734	2.06615	-2.80088				0.146164				0.023305
	RWW	0.825155	2.49932	2.36978	6.41372	-13.868	-3.95093	-5.71098	6.37335	0.12947	0.392151	0.371826	1.00633	-2.17594	-0.619913	-0.896072	1.89978	-2.79585				2.30607				0.36183
	SHS							0	1.09606	0	0	0	0	0	0	0	0	0				0				0
	SHW							0	1.09606	0	0	0	0	0	0	0	0	0				0				0
	WDS	0.337567	1.31196	3.88429	9.6404	-15.8192	-5.30387	-5.94882	9.28775	0.0363454	0.141257	0.418217	1.03797	-1.70323	-0.571061	-0.640501	1.63379	-2.27429				0.684085				0.0736546
	WDW	1.16754	2.35907	2.59849	6.75976	-15.1508	-4.31637	-6.58227	9.54546	0.122313	0.24714	0.272223	0.708165	-1.58722	-0.452191	-0.689571	1.34984	-2.03941				12.0849				1.26603
CO	EUS	0.00990343	0.0641736	0.0229673	0.0398641	0.23461	0.0786604	0.450179	2.47364	0.00400358	0.025943	0.00928481	0.0161155	0.094844	0.0317994	0.18199	0.0553469	0.126643				-0.000357662				-0.000144589
	EUW	-0.00505379	0.108462	0.0292799	0.0517801	0.34922	0.0994909	0.633179	3.10853	-0.00162578	0.0348917	0.0094192	0.0166574	0.112342	0.0320058	0.203691	0.0593425	0.144348				0.000443903				0.000142802
	CNS	-0.0734254	0.400611	0.167548	0.506274	1.13046	0.379022	2.51049	12.9065	-0.00568901	0.0310394	0.0129816	0.0392262	0.0875882	0.0293667	0.194513	0.0775582	0.116955				0.0134768				0.00104418
	CNW	0.0351884	0.502836	0.166255	0.451407	1.89796	0.540719	3.59437	17.1191	0.0020555	0.0293728	0.00971166	0.0263686	0.110868	0.0315857	0.209962	0.0675085	0.142454				-0.00640716				-0.000374269
	RWS	-0.0379371	0.4192	0.441243	1.54057	3.24023	1.08639	6.6897	34.6446	-0.00109504	0.0121	0.0127363	0.0444678	0.0935277	0.0313581	0.193095	0.068209	0.124886				0.00412489				0.000119063
	RWW	0.0301616	0.688574	0.384533	1.21861	3.91534	1.11546	7.35268	35.1645	0.000857728	0.0195815	0.0109353	0.0346545	0.111343	0.0317212	0.209094	0.066029	0.143065				-0.000611829				-1.7399e-05
	SHS							0	0.114038	0	0	0	0	0	0	0	0	0				0				0
	SHW							0	0.114038	0	0	0	0	0	0	0	0	0				0				0
	WDS	-0.101459	0.883985	0.631758	2.08671	4.6053	1.54407	9.65036	50.0248	-0.00202818	0.0176709	0.0126289	0.0417135	0.0920603	0.0308661	0.192912	0.0699851	0.122926				0.0153886
	WDW	0.0602962	1.29987	0.580068	1.7218	6.16252	1.75567	11.5802	55.3922	0.00108853	0.0234667	0.010472	0.0310838	0.111253	0.0316953	0.209059	0.066111	0.142948				-0.00593881
VOC	EUS	-0.0551945	-0.162767	0.0366224	0.0679688	0.11037	0.037005	0.0340047	0.28136	-0.19617	-0.578501	0.130162	0.241572	0.392273	0.131522	0.120858	-0.402937	0.523795				0.00377997				0.0134346
[C]	EUW	-0.109292	-0.35748	0.0589249	0.0835749	0.10372	0.0295493	-0.191003	0.36227	-0.301687	-0.986778	0.162655	0.230698	0.286306	0.081567	-0.527239	-0.895112	0.367873				-0.000654591				-0.00180691
	CNS	-0.392661	-0.428503	0.131567	0.389768	0.1131	0.0379203	-0.148809	0.552548	-0.710637	-0.775504	0.23811	0.705401	0.204688	0.0686281	-0.269314	-0.54263	0.273316				0.00811185				0.0146808
	CNW	-0.268583	-0.293697	0.127691	0.27149	0.24497	0.0697906	0.151662	0.842324	-0.318859	-0.348675	0.151594	0.322311	0.290826	0.0828549	0.180051	-0.19363	0.373681				0.059748				0.0709323
	RWS	-1.15367	-3.25498	0.375317	1.26679	1.34266	0.450169	-0.973714	4.07751	-0.282935	-0.798276	0.0920456	0.310677	0.329284	0.110403	-0.238801	-0.678488	0.439687				0.0175057				0.00429323
	RWW	-1.09619	-3.78322	0.327497	0.795869	1.73918	0.495483	-1.52138	4.16575	-0.263143	-0.908173	0.0786166	0.191051	0.417495	0.118942	-0.365212	-0.901649	0.536437				0.0625915				0.0150253
	SHS							0	0.209536	0	0	0	0	0	0	0	0	0				0				0
	SHW							0	0.209536	0	0	0	0	0	0	0	0	0				0				0
	WDS	-1.60153	-3.84625	0.543506	1.72453	1.56613	0.525095	-1.08852	4.91142	-0.326082	-0.783124	0.110662	0.351126	0.318875	0.106913	-0.22163	-0.647418	0.425788				0.0301018				0.00612894
	WDW	-1.47406	-4.4344	0.514113	1.15093	2.08787	0.594823	-1.56072	5.37034	-0.274482	-0.825719	0.0957318	0.214313	0.388778	0.110761	-0.290619	-0.790157	0.499538				0.124093				0.0231071
BC	EUS	2.32728	0.232621					2.5599	0.031786	73.2171	7.31835	0	0	0	0	80.5355	80.5355	0				0				0
[C]	EUW	1.45945	0.0754594					1.53491	0.047604	30.6581	1.58515	0	0	0	0	32.2433	32.2433	0				0				0
	CNS	11.1616	1.3483					12.5099	0.108732	102.652	12.4002	0	0	0	0	115.053	115.053	0				0				0
	CNW	6.47929	0.466039					6.94533	0.177482	36.5067	2.62584	0	0	0	0	39.1326	39.1326	0				0				0
	RWS	33.7542	5.67034					39.4245	0.342568	98.5328	16.5525	0	0	0	0	115.085	115.085	0				0				0
	RWW	28.3228	4.55643					32.8792	0.357486	79.2277	12.7458	0	0	0	0	91.9735	91.9735	0				0				0
	SHS							0	0.012164	0	0	0	0	0	0	0	0	0				0				0
	SHW							0	0.012196	0	0	0	0	0	0	0	0	0				0				0
	WDS	47.2431	7.25126					54.4943	0.483086	97.7943	15.0103	0	0	0	0	112.805	112.805	0				0				0
	WDW	36.2615	5.09793					41.3595	0.582572	62.2439	8.75073	0	0	0	0	70.9946	70.9946	0				0				0
OC	EUS	-0.349295	-0.951111					-1.30041	0.03996	-8.74112	-23.8016	0	0	0	0	-32.5427	-32.5427	0				0				0
[C]	EUW	-0.134836	-1.13833					-1.27317	0.0655371	-2.0574	-17.3692	0	0	0	0	-19.4266	-19.4266	0				0				0
OC->C:	CNS	-1.51273	-4.09777					-5.6105	0.211923	-7.13812	-19.3361	0	0	0	0	-26.4743	-26.4743	0				0				0
1.4	CNW	-1.26466	-2.71011					-3.97477	0.367731	-3.43909	-7.36981	0	0	0	0	-10.8089	-10.8089	0				0				0
	RWS	-5.78409	-19.9472					-25.7313	0.783989	-7.37777	-25.4432	0	0	0	0	-32.821	-32.821	0				0				0
	RWW	-5.63612	-20.5225					-26.1586	0.821396	-6.86164	-24.9849	0	0	0	0	-31.8466	-31.8466	0				0				0
	SHS							0	0.0127143	0	0	0	0	0	0	0	0	0				0				0
	SHW							0	0.0127471	0	0	0	0	0	0	0	0	0				0				0
	WDS	-7.64611	-24.9961					-32.6422	1.03587	-7.38134	-24.1305	0	0	0	0	-31.5118	-31.5118	0				0				0
	WDW	-7.03562	-24.3709					-31.4066	1.25466	-5.60757	-19.4243	0	0	0	0	-25.0318	-25.0318	0				0				0
NH3	EUS							0	-999	0	0	0	0	0	0	0	0	0				0				0
	EUW							0	-999	0	0	0	0	0	0	0	0	0				0				0
	CNS							0	-999	0	0	0	0	0	0	0	0	0				0				0
	CNW							0	-999	0	0	0	0	0	0	0	0	0				0				0
	RWS							0	-999	0	0	0	0	0	0	0	0	0				0				0
	RWW							0	-999	0	0	0	0	0	0	0	0	0				0				0
	WDS							0	-999	0	0	0	0	0	0	0	0	0				0				0
	WDW							0	-999	0	0	0	0	0	0	0	0	0				0				0
All	SHS	-2.97128	-10.5627	0.704313	1.92352	-4.27817	-1.43439	-16.6187	2.47131	-1.20231	-4.27413	0.284996	0.778341	-1.73114	-0.580418	-6.72466	-4.41311	-2.31155				-0.0176873				-0.00715705
	SHW	-1.81879	-8.717	0.704564	1.82107	-5.25084	-1.49594	-14.7569	2.47135	-0.735951	-3.52723	0.285093	0.736874	-2.12469	-0.605313	-5.97121	-3.24121	-2.73				-0.0688485				-0.0278587
CH4	Summer	0.0863428	4.40713	4.45359	12.4381	50.3806		71.7658	36.5239	0.00236401	0.120664	0.121936	0.340547	1.37939	0	1.9649	0.585511	1.37939				-0.0012445				-3.40735e-05
	Winter	-0.25439	1.7155	3.61831	10.3414	48.9996		64.4204	35.2606	-0.00721458	0.0486521	0.102616	0.293285	1.38964	0	1.82698	0.437339	1.38964				0				0

## Sheet: HadGEM3
ECLIPSE T4.3 Radiative Forcing Simulations (Absolute RF in mWm-2, Normalised RF in mWm-2 Tg[species]-1)											Perturbation codes: EUS Europe Summer, EUW Europe Winter, CNS China Summer, CNW China Winter, RWS Rest of the World Summer, RWW Rest of the World Winter, SHS Shipping Summer, SHW Shipping Winter, WDS World Summer, WDW World Winter
Model:		HadGEM3									Note: Methane RF is Delta[CH4]_ppb * RF/ppb, increased by 15% to represent stratospheric water changes
											Note: Primary mode ozone RF is DeltaCH4(ppb) * [Ozone RF / DeltaCH4(ppb)]_in_CH4_perturb
	Perturb	ARF	SW+LW O3	CH4	PM O3	Total RF	DeltaEmi	nARF	nSW+LW O3	nCH4	nPM O3	Total nRF	Total SLnRF	Total LLnRF												ADRF NI (from TOT and CTM2 ratio)				nADRF NI
SO2	EUS	13.8709				13.8709	-0.771942	-17.9688	0	0	0	-17.9688	-17.9688	0												-0.511933				0.663175
	EUW	3.97653				3.97653	-0.845543	-4.70293	0	0	0	-4.70293	-4.70293	0												-0.318083				0.376187
	CNS	33.2218				33.2218	-3.14065	-10.578	0	0	0	-10.578	-10.578	0												-1.44575				0.460335
	CNW	10.142				10.142	-3.35314	-3.02463	0	0	0	-3.02463	-3.02463	0												-0.865601				0.258146
	RWS	90.5082				90.5082	-4.61614	-19.6069	0	0	0	-19.6069	-19.6069	0												-2.2511				0.487658
	RWW	53.5403				53.5403	-4.68146	-11.4367	0	0	0	-11.4367	-11.4367	0				Cells below are used to compute columns E and F:								-2.0413				0.43604
	SHS					0	-999	0	0	0	0	0	0	0												0				0
	SHW					0	-999	0	0	0	0	0	0	0				Delta[CH4]_ppb		RF/ppb		OzoneRF/DeltaCH4_o3_perturb				0				0
	WDS	137.601				137.601	-8.52873	-16.1338	0	0	0	-16.1338	-16.1338	0												-3.66775				0.430046
	WDW	67.6588				67.6588	-8.88014	-7.61911	0	0	0	-7.61911	-7.61911	0												-2.95389				0.33264
NOX	EUS	0.182091	-0.475293	0.584898	0.201438	0.493134	-0.996201	-0.182785	0.477106	-0.587128	-0.202206	-0.495014	0.29432	-0.789334				1.40112		0.363		0.145589				0.129529				-0.130023
[NO2]	EUW	0.00519672	-0.126589	0.22707	0.0782026	0.18388	-1.06187	-0.00489393	0.119213	-0.21384	-0.0736461	-0.173166	0.114319	-0.287486				0.543945		0.363		0.145589				0.0171884				-0.0161869
	CNS	2.07014	-1.98417	1.26346	0.435134	1.78456	-2.02965	-1.01995	0.977592	-0.622501	-0.214388	-0.879246	-0.0423571	-0.836889				3.02661		0.363		0.145589				2.7709				-1.36521
	CNW	0.866601	-0.497836	0.659654	0.227184	1.2556	-2.13188	-0.406496	0.23352	-0.309424	-0.106565	-0.588965	-0.172976	-0.415989				1.5802		0.363		0.145589				7.86293				-3.68826
	RWS	6.44722	-11.2115	11.3	3.89172	10.4275	-7.17435	-0.898649	1.56272	-1.57506	-0.542449	-1.45344	0.664071	-2.11751				27.0692		0.363		0.145589				6.51988				-0.908777
	RWW	5.09841	-7.76577	10.8081	3.72229	11.863	-6.68958	-0.762142	1.16088	-1.61566	-0.556431	-1.77335	0.398734	-2.17209				25.8907		0.363		0.145589				11.9356				-1.78421
	SHS					0	-999	0	0	0	0	0	0	0												0				0
	SHW					0	-999	0	0	0	0	0	0	0												0				0
	WDS	8.69945	-13.671	13.1484	4.52829	12.7052	-10.2002	-0.852871	1.34026	-1.28903	-0.443941	-1.24558	0.487394	-1.73297												7.34254				-0.719843
	WDW	5.97021	-8.3902	11.6948	4.02767	13.3025	-9.88333	-0.604068	0.848924	-1.18329	-0.407522	-1.34595	0.244855	-1.59081												21.2183				-2.14688
CO	EUS	-0.229861	-0.0814651	-0.158684	-0.0546506	-0.524661	-2.43213	0.0945102	0.0334954	0.0652449	0.0224703	0.215721	0.128006	0.0877151				-0.380127		0.363		0.145589				-0.0166046				0.00682718
	EUW	-0.274402	-0.102466	-0.253568	-0.0873286	-0.717765	-3.18188	0.086239	0.032203	0.0796914	0.0274456	0.225579	0.118442	0.107137				-0.607422		0.363		0.145589				-0.00700532				0.00220163
	CNS	-1.60304	-0.741145	-0.751276	-0.258739	-3.3542	-13.0988	0.122381	0.0565811	0.0573546	0.0197529	0.256069	0.178962	0.0771075				-1.79968		0.363		0.145589				-0.464788				0.0354832
	CNW	-2.0057	-0.614718	-1.31732	-0.453684	-4.39142	-17.5773	0.114107	0.0349723	0.0749445	0.0258108	0.249835	0.14908	0.100755				-3.15564		0.363		0.145589				-0.240384				0.0136758
	RWS	-3.88451	-2.82573	-4.09761	-1.41121	-12.2191	-64.3906	0.0603273	0.0438842	0.0636367	0.0219164	0.189765	0.104211	0.0855531				-9.8158		0.363		0.145589				-0.0146805				0.000227991
	RWW	-3.75174	-1.98902	-4.00129	-1.37804	-11.1201	-51.4021	0.0729881	0.0386953	0.077843	0.026809	0.216335	0.111683	0.104652				-9.58508		0.363		0.145589				-0.0121925				0.000237198
	SHS					0	-999	0	0	0	0	0	0	0												0				0
	SHW					0	-999	0	0	0	0	0	0	0												0				0
	WDS	-5.71741	-3.64834	-5.00757	-1.7246	-16.0979	-79.9215	0.0715378	0.045649	0.062656	0.0215787	0.201422	0.117187	0.0842347												-0.149275				0.00186777
	WDW	-6.03184	-2.7062	-5.57218	-1.91905	-16.2293	-72.1613	0.0835883	0.0375022	0.0772184	0.0265939	0.224903	0.121091	0.103812												-0.154093				0.0021354
VOC	EUS	-0.0462801	-0.0370455	-0.0249186	-0.00858193	-0.116826	-0.0563011	0.822011	0.657989	0.442595	0.152429	2.07502	1.48	0.595024				-0.0596924		0.363		0.145589				0.00233045				-0.0413926
[C]	EUW	-0.0514605	-0.0529796	-0.0233898	-0.00805544	-0.135885	-0.0668507	0.769783	0.792506	0.349882	0.120499	2.03267	1.56229	0.470381				-0.0560303		0.363		0.145589				-0.000223849				0.0033485
	CNS	-0.0935866	-0.151256	-0.0466776	-0.0160757	-0.307596	-0.145189	0.644585	1.04179	0.321495	0.110723	2.11859	1.68637	0.432218				-0.111816		0.363		0.145589				0.00154909				-0.0106694
	CNW	0.269541	-0.130534	-0.0886672	-0.0305369	0.0198029	-0.189049	-1.42577	0.690477	0.469017	0.161529	-0.10475	-0.735296	0.630546				-0.212402		0.363		0.145589				-0.0638111				0.337537
	RWS	-0.784607	-1.02285	-0.53975	-0.185889	-2.5331	-1.44339	0.543586	0.708644	0.373946	0.128787	1.75496	1.25223	0.502733				-1.29297		0.363		0.145589				0.0089095				-0.00617262
	RWW	-0.864955	-0.645517	-0.578632	-0.19928	-2.28838	-1.05804	0.817507	0.610106	0.54689	0.188348	2.16285	1.42761	0.735238				-1.38611		0.363		0.145589				0.0366747				-0.0346628
	SHS					0	-999	0	0	0	0	0	0	0												0				0
	SHW					0	-999	0	0	0	0	0	0	0												0				0
	WDS	-0.924474	-1.21115	-0.611347	-0.210547	-2.95752	-1.64488	0.562031	0.736316	0.371666	0.128001	1.79801	1.29835	0.499668												0.0130912				-0.00795878
	WDW	-0.646875	-0.829031	-0.690689	-0.237872	-2.40447	-1.31394	0.492317	0.63095	0.525662	0.181038	1.82997	1.12327	0.7067												0.0428355				-0.0326008
BC	EUS	-3.08719				-3.08719	-0.031302	98.626	0	0	0	98.626	98.626	0												0				0
[C]	EUW	-1.51655				-1.51655	-0.048614	31.1957	0	0	0	31.1957	31.1957	0												0				0
	CNS	-9.89633				-9.89633	-0.11036	89.6732	0	0	0	89.6732	89.6732	0												0				0
	CNW	-0.662975				-0.662975	-0.177213	3.74112	0	0	0	3.74112	3.74112	0												0				0
	RWS	-50.6148				-50.6148	-0.31334	161.533	0	0	0	161.533	161.533	0												0				0
	RWW	-29.967				-29.967	-0.321528	93.2018	0	0	0	93.2018	93.2018	0												0				0
	SHS					0	-999	0	0	0	0	0	0	0												0				0
	SHW					0	-999	0	0	0	0	0	0	0												0				0
	WDS	-63.5983				-63.5983	-0.455002	139.776	0	0	0	139.776	139.776	0												0				0
	WDW	-32.1465				-32.1465	-0.547355	58.7307	0	0	0	58.7307	58.7307	0												0				0
OC	EUS	0.55472				0.55472	-0.0394859	-14.0486	0	0	0	-14.0486	-14.0486	0												0				0
[C]	EUW	0.436169				0.436169	-0.0689392	-6.32686	0	0	0	-6.32686	-6.32686	0												0				0
OC->C:	CNS	1.13221				1.13221	-0.215149	-5.26245	0	0	0	-5.26245	-5.26245	0												0				0
1.4	CNW	-0.458156				-0.458156	-0.367132	1.24793	0	0	0	1.24793	1.24793	0												0				0
	RWS	26.0364				26.0364	-0.743451	-35.021	0	0	0	-35.021	-35.021	0												0				0
	RWW	19.2709				19.2709	-0.76317	-25.2511	0	0	0	-25.2511	-25.2511	0												0				0
	SHS					0	-999	0	0	0	0	0	0	0												0				0
	SHW					0	-999	0	0	0	0	0	0	0												0				0
	WDS	27.7233				27.7233	-0.998086	-27.7765	0	0	0	-27.7765	-27.7765	0												0				0
	WDW	19.2489				19.2489	-1.19924	-16.0509	0	0	0	-16.0509	-16.0509	0												0				0
NH3	EUS					0	-999	0	0	0	0	0	0	0												0				0
	EUW					0	-999	0	0	0	0	0	0	0												0				0
	CNS					0	-999	0	0	0	0	0	0	0												0				0
	CNW					0	-999	0	0	0	0	0	0	0												0				0
	RWS					0	-999	0	0	0	0	0	0	0												0				0
	RWW					0	-999	0	0	0	0	0	0	0												0				0
	WDS					0	-999	0	0	0	0	0	0	0												0				0
	WDW					0	-999	0	0	0	0	0	0	0												0				0
All	SHS	8.32915	-3.42249	4.03202	1.38862	10.3273	-2.81	-2.96411	1.21797	-1.43488	-0.494172	-3.6752	-1.74614	-1.92905				9.65869		0.363		0.145589				0.0103243				-0.00367412
	SHW	8.50034	-3.07796	5.03411	1.73374	12.1902	-2.81	-3.02503	1.09536	-1.7915	-0.61699	-4.33816	-1.92967	-2.40849				12.0592		0.363		0.145589				0.0717307				-0.0255269
CH4	Annual	-36.3036	-48.6266	-141.193		-226.123	-117.113	0.309988	0.415212	1.20561	0	1.93081	0.7252	1.20561												0.523261				-0.00446801
	N/A					0	-999	0	0	0	0	0	0	0												0				0

## Sheet: ECHAM6
ECLIPSE T4.3 Radiative Forcing Simulations (Absolute RF in mWm-2, Normalised RF in mWm-2 Tg[species]-1)											Perturbation codes: EUS Europe Summer, EUW Europe Winter, CNS China Summer, CNW China Winter, RWS Rest of the World Summer, RWW Rest of the World Winter, SHS Shipping Summer, SHW Shipping Winter, WDS World Summer, WDW World Winter
Model:		ECHAM6-HAMMOZ
	Perturb	ADRF	AIRF	Total RF	DeltaEmi	nADRF	nAIRF	Total nRF	Total SLnRF	Total LLnRF							ADRF NI (from TOT and CTM2 ratio)				nADRF NI
SO2	EUS	-2.45308		-2.45308	0.754654	-3.2506	0	-3.2506	-3.2506	0							0.121703				0.16127
	EUW	-0.952535		-0.952535	0.822845	-1.15761	0	-1.15761	-1.15761	0							0.0960332				0.116709
	CNS	-4.46253		-4.46253	3.07068	-1.45327	0	-1.45327	-1.45327	0							0.2705				0.0880911
	CNW	-3.78612		-3.78612	3.26286	-1.16037	0	-1.16037	-1.16037	0							0.527608				0.161701
	RWS	-13.2896		-13.2896	4.97903	-2.66911	0	-2.66911	-2.66911	0							0.543985				0.109255
	RWW	-10.7124		-10.7124	5.02554	-2.13159	0	-2.13159	-2.13159	0							0.73648				0.146547
	SHS				1.24748												0				0
	SHW				1.23947												0				0
	WDS	-20.2052		-20.2052	8.80436	-2.29491	0	-2.29491	-2.29491	0							0.908744				0.103215
	WDW	-15.4511		-15.4511	9.11125	-1.69582	0	-1.69582	-1.69582	0							1.25265				0.137484
NOX	EUS
[NO2]	EUW
	CNS
	CNW
	RWS
	RWW
	SHS
	SHW
	WDS
	WDW
CO	EUS
	EUW
	CNS
	CNW
	RWS
	RWW
	SHS
	SHW
	WDS
	WDW
VOC	EUS
[C]	EUW
	CNS
	CNW
	RWS
	RWW
	SHS
	SHW
	WDS
	WDW
BC	EUS	0.974845		0.974845	0.03122	31.225	0	31.225	31.225	0
[C]	EUW	0.503407		0.503407	0.0485559	10.3676	0	10.3676	10.3676	0
	CNS	1.11079		1.11079	0.110691	10.0351	0	10.0351	10.0351	0
	CNW	1.59031		1.59031	0.177134	8.97801	0	8.97801	8.97801	0
	RWS	8.58142		8.58142	0.3494	24.5604	0	24.5604	24.5604	0
	RWW	8.16078		8.16078	0.358214	22.7819	0	22.7819	22.7819	0
	SHS				0.0147238
	SHW				0.0146251
	WDS	10.6671		10.6671	0.491311	21.7114	0	21.7114	21.7114	0
	WDW	10.2545		10.2545	0.583904	17.562	0	17.562	17.562	0
OC	EUS	-0.0707089		-0.0707089	0.0373764	-1.89181	0	-1.89181	-1.89181	0
[C]	EUW	-0.0461792		-0.0461792	0.0686226	-0.672944	0	-0.672944	-0.672944	0
OC->C:	CNS	-0.174657		-0.174657	0.215786	-0.809399	0	-0.809399	-0.809399	0
1.4	CNW	-0.366148		-0.366148	0.367085	-0.997447	0	-0.997447	-0.997447	0
	RWS	-0.900023		-0.900023	0.801567	-1.12283	0	-1.12283	-1.12283	0
	RWW	-1.31732		-1.31732	0.822269	-1.60205	0	-1.60205	-1.60205	0
	SHS				0.0156937
	SHW				0.0156975
	WDS	-1.14539		-1.14539	1.05473	-1.08596	0	-1.08596	-1.08596	0
	WDW	-1.72965		-1.72965	1.25798	-1.37494	0	-1.37494	-1.37494	0
NH3	EUS
	EUW
	CNS
	CNW
	RWS
	RWW
	WDS
	WDW
All	SHS	-2.18863		-2.18863	1.2779	-1.71268	0	-1.71268	-1.71268	0
	SHW	-1.86538		-1.86538	1.26979	-1.46904	0	-1.46904	-1.46904	0
CH4	Summer
	Winter

## Sheet: Methane
Model	tau_OH_Control(yr)	tau_OH_perturb(yr)	tau_CH4_control(yr)	tau_CH4_perturb(yr)	Burden_Control(Tg[CH4])	Burden_Perturb(Tg[CH4])	DeltaBurden(Tg[CH4])	s	f	DeltaEmiss(Tg[CH4]/yr)	CH4_VMR_control(ppbv)	CH4_VMR_perturb(ppbv)	RF_CH4(Wm-2)	NRF_CH4(mWm-2/Tg[CH4])	NRF_SWV(mWm-2/Tg[CH4])	RF_Ozone(mWm-2)	NRF_Ozone(mWm-2/Tg[CH4]/yr)	NRF_O3/NRF_CH4
OsloCTM2	10.2429	9.61573	8.91171	8.43316	4909.33	4115.04	794.299	0.312737	1.45505	61.2556	1728.18	1448.57	0.108517	1.77155	0.265732	42.8614	0.699715	0.394973
HadGEM3	5.96	5.63	5.4834	5.20283	4560.8	3702.4	858.4	0.251891	1.3367	117.113	1605.49	1303.32	0.122776	1.04836	0.157254	48.6266	0.415212	0.396059
NorESM(S)	7.8	7.67	7.00337	6.89839	4814.81	4488.79	326.02	0.215415	1.27456	36.5239	1694.91	1580.14	0.0438092	1.19947	0.17992	16.8917	0.462483	0.385574
NorESM(W)	7.8	7.67	7.00337	6.89839	4814.81	4497.57	317.24	0.22159	1.28467	35.2606	1694.91	1583.23	0.0426083	1.20838	0.181258	13.9597	0.395902	0.327629
													Formula in Table 3 of Myhre et al. (1998)		Stratospheric water vapour contribution (extra 15% Myhre et al., 2007)
tau_strat	120	yr
tau_soil	160	yr
Matm	5130000	Tg (assumes methane is well mixed throughout the atmosphere)
m_dry_air	28.966
m_methane	16.04
factor	0.35202	Conversion burden (Tg) to vmr (ppbv)
C0	1788	Reference methane mass-mixing ratio (ppb) (WMO Ozone Assessment Report)
N2O_mmr	325	pbb (WMO, 2014)

## Sheet: Best(OsloNitr)
# Best estimates of ECLIPSE T4.3 Radiative Forcing Simulations (Normalised RF in mWm-2 Tg[species]-1)														Best estimates are given for each main process.					Perturbation codes: EUS Europe Summer, EUW Europe Winter, CNS China Summer, CNW China Winter, RWS Rest of the World Summer, RWW Rest of the World Winter, SHS Shipping Summer, SHW Shipping Winter, WDS World Summer, WDW World Winter
#														Nitrate RF is directly taken from OsloCTM2 and added to NorESM, HadGEM3, and ECHAM6.											Note: Best/low/high estimates of total nRF are sums of component best/low/high estimates, not averages of modelled nRF.
# Model:			OsloCTM2							NorESM					HadGEM3					ECHAM6		Include in	Best							Low							High
Species	Units	Perturb	AD+IRF	BC_SNOW	BC_SEMID	Ozone	Methane	PM Ozone	Total nRF	AD+IRF	Ozone	Methane	PM Ozone	Total nRF	AD+IRF	Ozone	Methane	PM Ozone	Total nRF	AD+IRF	Total nRF		AD+IRF	BC_SNOW	BC_SEMID	Ozone	Methane	PM Ozone	Total nRF	AD+IRF	BC_SNOW	BC_SEMID	Ozone	Methane	PM Ozone	Total nRF	AD+IRF	BC_SNOW	BC_SEMID	Ozone	Methane	PM Ozone	Total nRF
SO2	SO2	EUS	-6.09451	0		0	0	0	-6.09451	-8.56227	0	0	0	-8.56227	-17.7353	0	0	0	-17.7353	-3.01705	-3.01705	O,N,H	-10.7974	0	0	0	0	0	-10.7974	-17.7353	0	0	0	0	0	-17.7353	-6.09451	0	0	0	0	0	-6.09451
SO2	SO2	EUW	-1.92018	0		0	0	0	-1.92018	-2.93428	0	0	0	-2.93428	-4.53598	0	0	0	-4.53598	-0.990662	-0.990662	O,N,H	-3.13015	0	0	0	0	0	-3.13015	-4.53598	0	0	0	0	0	-4.53598	-1.92018	0	0	0	0	0	-1.92018
SO2	SO2	CNS	-4.42539	0		0	0	0	-4.42539	-7.5897	0	0	0	-7.5897	-10.3767	0	0	0	-10.3767	-1.25192	-1.25192	O,N,H	-7.46391	0	0	0	0	0	-7.46391	-10.3767	0	0	0	0	0	-10.3767	-4.42539	0	0	0	0	0	-4.42539
SO2	SO2	CNW	-2.22978	0		0	0	0	-2.22978	-3.07768	0	0	0	-3.07768	-2.81656	0	0	0	-2.81656	-0.952303	-0.952303	O,N,H	-2.70801	0	0	0	0	0	-2.70801	-3.07768	0	0	0	0	0	-3.07768	-2.22978	0	0	0	0	0	-2.22978
SO2	SO2	RWS	-7.16176	0		0	0	0	-7.16176	-10.8635	0	0	0	-10.8635	-19.4242	0	0	0	-19.4242	-2.48645	-2.48645	O,N,H	-12.4832	0	0	0	0	0	-12.4832	-19.4242	0	0	0	0	0	-19.4242	-7.16176	0	0	0	0	0	-7.16176
SO2	SO2	RWW	-5.29436	0		0	0	0	-5.29436	-7.66167	0	0	0	-7.66167	-11.2268	0	0	0	-11.2268	-1.92174	-1.92174	O,N,H	-8.06095	0	0	0	0	0	-8.06095	-11.2268	0	0	0	0	0	-11.2268	-5.29436	0	0	0	0	0	-5.29436
SO2	SO2	SHS	-9.73977	0		0	0	0	-9.73977	0	0	0	0	0	0	0	0	0	0	0	0
SO2	SO2	SHW	-6.54685	0		0	0	0	-6.54685	0	0	0	0	0	0	0	0	0	0	0	0
SO2	SO2	WDS	-6.49634	0		0	0	0	-6.49634	-9.54011	0	0	0	-9.54011	-15.9559	0	0	0	-15.9559	-2.11701	-2.11701	O,N,H	-10.6641	0	0	0	0	0	-10.6641	-15.9559	0	0	0	0	0	-15.9559	-6.49634	0	0	0	0	0	-6.49634
SO2	SO2	WDW	-4.16399	0		0	0	0	-4.16399	-5.60895	0	0	0	-5.60895	-7.42902	0	0	0	-7.42902	-1.50573	-1.50573	O,N,H	-5.73399	0	0	0	0	0	-5.73399	-7.42902	0	0	0	0	0	-7.42902	-4.16399	0	0	0	0	0	-4.16399
NOX	NO2	EUS	-0.45861	0		0.509437	-0.859775	-0.295294	-1.10424	-0.489496	0.466561	-0.88733	-0.297505	-1.20777	-0.373413	0.477106	-0.587128	-0.202206	-0.685642	0	0	O,N,H	-0.440506	0	0	0.484368	-0.778078	-0.265002	-0.999218	-0.489496	0	0	0.466561	-0.88733	-0.297505	-1.20777	-0.373413	0	0	0.509437	-0.587128	-0.202206	-0.65331
NOX	NO2	EUW	-0.31875	0		0.195181	-0.408163	-0.140186	-0.671919	-0.178795	0.095528	-0.302979	-0.0863171	-0.472563	-0.249646	0.119213	-0.21384	-0.0736461	-0.417919	0	0	O,N,H	-0.249064	0	0	0.136641	-0.308327	-0.10005	-0.5208	-0.31875	0	0	0.095528	-0.408163	-0.140186	-0.771571	-0.178795	0	0	0.195181	-0.21384	-0.0736461	-0.2711
NOX	NO2	CNS	-0.256265	0		0.917368	-0.879881	-0.3022	-0.520978	-0.145672	1.01319	-0.881059	-0.295403	-0.308943	-1.16663	0.977592	-0.622501	-0.214388	-1.02593	0	0	O,N,H	-0.522855	0	0	0.969384	-0.79448	-0.270664	-0.618616	-1.16663	0	0	0.917368	-0.881059	-0.3022	-1.43252	-0.145672	0	0	1.01319	-0.622501	-0.214388	0.03063
NOX	NO2	CNW	-0.766282	0		0.325261	-0.566219	-0.194471	-1.20171	-0.627615	0.224229	-0.455324	-0.129719	-0.988429	-1.09671	0.23352	-0.309424	-0.106565	-1.27918	0	0	O,N,H	-0.830201	0	0	0.261003	-0.443656	-0.143585	-1.15644	-1.09671	0	0	0.224229	-0.566219	-0.194471	-1.63317	-0.627615	0	0	0.325261	-0.309424	-0.106565	-0.718343
NOX	NO2	RWS	-0.251191	0		1.38025	-1.79487	-0.616457	-1.28227	0.183839	1.75601	-2.0976	-0.703285	-0.861033	-1.02495	1.56272	-1.57506	-0.542449	-1.57974	0	0	O,N,H	-0.3641	0	0	1.56633	-1.82251	-0.620731	-1.24101	-1.02495	0	0	1.38025	-2.0976	-0.703285	-2.44557	0.183839	0	0	1.75601	-1.57506	-0.542449	-0.177663
NOX	NO2	RWW	-0.394353	0		0.977045	-1.84848	-0.634868	-1.90065	0.245301	1.37816	-2.17594	-0.619913	-1.17239	-1.03846	1.16088	-1.61566	-0.556431	-2.04968	0	0	O,N,H	-0.395838	0	0	1.17203	-1.88002	-0.603737	-1.70757	-1.03846	0	0	0.977045	-2.17594	-0.634868	-2.87222	0.245301	0	0	1.37816	-1.61566	-0.556431	-0.548628
NOX	NO2	SHS	-0.21896	0		1.86576	-3.38053	-1.16106	-2.89479	0	0	0	0	0	0	0	0	0	0	0	0
NOX	NO2	SHW	-0.0739652	0		1.65646	-4.17516	-1.43398	-4.02665	0	0	0	0	0	0	0	0	0	0	0	0
NOX	NO2	WDS	-0.265513	0		1.29301	-1.78791	-0.614067	-1.37449	0.0560751	1.45619	-1.70323	-0.571061	-0.762028	-0.974398	1.34026	-1.28903	-0.443941	-1.36711	0	0	O,N,H	-0.394612	0	0	1.36315	-1.59339	-0.543023	-1.16787	-0.974398	0	0	1.29301	-1.78791	-0.614067	-2.08337	0.0560751	0	0	1.45619	-1.28903	-0.443941	-0.220714
NOX	NO2	WDW	-0.409002	0		0.884577	-1.82373	-0.626369	-1.97452	0.0502622	0.980387	-1.58722	-0.452191	-1.00876	-0.923259	0.848924	-1.18329	-0.407522	-1.66514	0	0	O,N,H	-0.427333	0	0	0.90463	-1.53141	-0.495361	-1.54948	-0.923259	0	0	0.848924	-1.82373	-0.626369	-2.52443	0.0502622	0	0	0.980387	-1.18329	-0.407522	-0.560157
CO	CO	EUS	-0.00348827	0		0.0407755	0.123509	0.0424199	0.203216	0.0297115	0.0254004	0.094844	0.0317994	0.181755	0.0942752	0.0334954	0.0652449	0.0224703	0.215486	0	0	O,N,H	0.0401661	0	0	0.0332237	0.0945327	0.0322299	0.200152	-0.00348827	0	0	0.0254004	0.0652449	0.0224703	0.109627	0.0942752	0	0	0.0407755	0.123509	0.0424199	0.30098
CO	CO	EUW	-0.00963956	0		0.0340141	0.149012	0.0511789	0.224565	0.033026	0.0260766	0.112342	0.0320058	0.203451	0.085999	0.032203	0.0796914	0.0274456	0.225339	0	0	O,N,H	0.0364618	0	0	0.0307646	0.113682	0.0368767	0.217785	-0.00963956	0	0	0.0260766	0.0796914	0.0274456	0.123574	0.085999	0	0	0.0340141	0.149012	0.0511789	0.320204
CO	CO	CNS	-0.00460297	0		0.062087	0.122427	0.042048	0.221959	0.0243158	0.0522078	0.0875882	0.0293667	0.193478	0.121346	0.0565811	0.0573546	0.0197529	0.255035	0	0	O,N,H	0.0470196	0	0	0.0569587	0.0891232	0.0303892	0.223491	-0.00460297	0	0	0.0522078	0.0573546	0.0197529	0.124712	0.121346	0	0	0.062087	0.122427	0.042048	0.347908
CO	CO	CNW	-0.00722196	0		0.0435122	0.147725	0.050737	0.234752	0.0306554	0.0360803	0.110868	0.0315857	0.209189	0.113334	0.0349723	0.0749445	0.0258108	0.249062	0	0	O,N,H	0.0455893	0	0	0.0381882	0.111179	0.0360445	0.231001	-0.00722196	0	0	0.0349723	0.0749445	0.0258108	0.128506	0.113334	0	0	0.0435122	0.147725	0.050737	0.355309
CO	CO	RWS	-0.0164389	0		0.0711023	0.12957	0.0445014	0.228735	0.0109431	0.0572041	0.0935277	0.0313581	0.193033	0.0602654	0.0438842	0.0636367	0.0219164	0.189703	0	0	O,N,H	0.0182565	0	0	0.0573968	0.0955781	0.032592	0.203823	-0.0164389	0	0	0.0438842	0.0636367	0.0219164	0.112998	0.0602654	0	0	0.0711023	0.12957	0.0445014	0.305439
CO	CO	RWW	-0.0133456	0		0.0559893	0.149568	0.05137	0.243582	0.020396	0.0455898	0.111343	0.0317212	0.20905	0.0729448	0.0386953	0.077843	0.026809	0.216292	0	0	O,N,H	0.0266651	0	0	0.0467581	0.112918	0.0366334	0.222975	-0.0133456	0	0	0.0386953	0.077843	0.026809	0.130002	0.0729448	0	0	0.0559893	0.149568	0.05137	0.329873
CO	CO	SHS	0.000127357	0		0.116665	0.0869565	0.0298656	0.233615	0	0	0	0	0	0	0	0	0	0	0	0
CO	CO	SHW	0.0114914	0		0.00593718	0.176991	0.0607885	0.255208	0	0	0	0	0	0	0	0	0	0	0	0
CO	CO	WDS	-0.0127808	0		0.0674942	0.12737	0.0437457	0.225829	0.0153176	0.0543424	0.0920603	0.0308661	0.192586	0.0712126	0.045649	0.062656	0.0215787	0.201096	0	0	O,N,H	0.0245831	0	0	0.0558285	0.0940286	0.0320635	0.206504	-0.0127808	0	0	0.045649	0.062656	0.0215787	0.117103	0.0712126	0	0	0.0674942	0.12737	0.0437457	0.309822
CO	CO	WDW	-0.0112061	0		0.050826	0.149027	0.051184	0.239831	0.0242761	0.0415558	0.111253	0.0316953	0.20878	0.0833092	0.0375022	0.0772184	0.0265939	0.224624	0	0	O,N,H	0.0321264	0	0	0.0432946	0.112499	0.0364911	0.224411	-0.0112061	0	0	0.0375022	0.0772184	0.0265939	0.130108	0.0833092	0	0	0.050826	0.149027	0.051184	0.334346
VOC	C	EUS	-0.646496	0		0.85987	0.64862	0.222772	1.08477	-0.740391	0.371734	0.392273	0.131522	0.155139	0.856291	0.657989	0.442595	0.152429	2.1093	0	0	O,N,H	-0.176865	0	0	0.629865	0.494496	0.168908	1.1164	-0.740391	0	0	0.371734	0.392273	0.131522	0.155139	0.856291	0	0	0.85987	0.64862	0.222772	2.58755
VOC	C	EUW	-0.567579	0		1.00763	0.168278	0.0577958	0.666121	-1.29092	0.393352	0.286306	0.081567	-0.529697	0.767324	0.792506	0.349882	0.120499	2.03021	0	0	O,N,H	-0.363726	0	0	0.731162	0.268155	0.0866206	0.722212	-1.29092	0	0	0.393352	0.168278	0.0577958	-0.671496	0.767324	0	0	1.00763	0.349882	0.120499	2.24533
VOC	C	CNS	-0.467867	0		1.47884	0.29883	0.102635	1.41244	-1.47827	0.943511	0.204688	0.0686281	-0.261439	0.652459	1.04179	0.321495	0.110723	2.12646	0	0	O,N,H	-0.431224	0	0	1.15471	0.275005	0.0939951	1.09249	-1.47827	0	0	0.943511	0.204688	0.0686281	-0.261439	0.652459	0	0	1.47884	0.321495	0.110723	2.56352
VOC	C	CNW	-0.341438	0		1.01564	0.0158441	0.00544174	0.695489	-0.561631	0.473904	0.290826	0.0828549	0.285955	-1.31987	0.690477	0.469017	0.161529	0.00115343	0	0	O,N,H	-0.740979	0	0	0.726674	0.258563	0.0832752	0.327533	-1.31987	0	0	0.473904	0.0158441	0.00544174	-0.824679	-0.341438	0	0	1.01564	0.469017	0.161529	1.30475
VOC	C	RWS	-0.868997	0		1.37898	0.775393	0.266312	1.55169	-1.07123	0.402723	0.329284	0.110403	-0.22882	0.553567	0.708644	0.373946	0.128787	1.76494	0	0	O,N,H	-0.46222	0	0	0.830116	0.492874	0.168501	1.02927	-1.07123	0	0	0.402723	0.329284	0.110403	-0.22882	0.553567	0	0	1.37898	0.775393	0.266312	2.97425
VOC	C	RWW	-0.713786	0		1.16662	0.742584	0.255044	1.45046	-1.13971	0.269667	0.417495	0.118942	-0.333607	0.849112	0.610106	0.54689	0.188348	2.19446	0	0	O,N,H	-0.334795	0	0	0.68213	0.56899	0.187445	1.10377	-1.13971	0	0	0.269667	0.417495	0.118942	-0.333607	0.849112	0	0	1.16662	0.742584	0.255044	3.01336
VOC	C	SHS	-0.0338826	0		0.956885	1.23252	0.423314	2.57883	0	0	0	0	0	0	0	0	0	0	0	0
VOC	C	SHW	-0.0310357	0		0.923933	0.975682	0.335103	2.20368	0	0	0	0	0	0	0	0	0	0	0	0
VOC	C	WDS	-0.76375	0		1.34992	0.696098	0.239078	1.52135	-1.09824	0.461788	0.318875	0.106913	-0.210659	0.573002	0.736316	0.371666	0.128001	1.80899	0	0	O,N,H	-0.429661	0	0	0.849342	0.462213	0.157998	1.03989	-1.09824	0	0	0.461788	0.318875	0.106913	-0.210659	0.573002	0	0	1.34992	0.696098	0.239078	2.8581
VOC	C	WDW	-0.610807	0		1.118	0.555693	0.190855	1.25374	-1.05689	0.310045	0.388778	0.110761	-0.247303	0.535632	0.63095	0.525662	0.181038	1.87328	0	0	O,N,H	-0.377354	0	0	0.68633	0.490044	0.160885	0.959905	-1.05689	0	0	0.310045	0.388778	0.110761	-0.247303	0.535632	0	0	1.118	0.555693	0.190855	2.40018
BC	C	EUS	66.1605	2.16667	-31	0	0	0	37.3272	80.5355	0	0	0	80.5355	98.626	0	0	0	98.626	31.225	31.225	O,N,H	81.774	2.16667	-31	0	0	0	52.9407	66.1605	2.16667	-31	0	0	0	37.3272	98.626	2.16667	-31	0	0	0	69.7926
BC	C	EUW	31.7256	17.0213	-3	0	0	0	45.7469	32.2433	0	0	0	32.2433	31.1957	0	0	0	31.1957	10.3676	10.3676	O,N,H	31.7215	17.0213	-3	0	0	0	45.7428	31.1957	17.0213	-3	0	0	0	45.217	32.2433	17.0213	-3	0	0	0	46.2646
BC	C	CNS	64.6486	1	-38	0	0	0	27.6486	115.053	0	0	0	115.053	89.6732	0	0	0	89.6732	10.0351	10.0351	O,N,H	89.7915	1	-38	0	0	0	52.7915	64.6486	1	-38	0	0	0	27.6486	115.053	1	-38	0	0	0	78.0526
BC	C	CNW	25.0867	5.02825	1	0	0	0	31.115	39.1326	0	0	0	39.1326	3.74112	0	0	0	3.74112	8.97801	8.97801	O,N,H	22.6535	5.02825	1	0	0	0	28.6817	3.74112	5.02825	1	0	0	0	9.76937	39.1326	5.02825	1	0	0	0	45.1608
BC	C	RWS	76.6966	1.36752	-42	0	0	0	36.0641	115.085	0	0	0	115.085	161.533	0	0	0	161.533	24.5604	24.5604	O,N,H	117.772	1.36752	-42	0	0	0	77.1392	76.6966	1.36752	-42	0	0	0	36.0641	161.533	1.36752	-42	0	0	0	120.901
BC	C	RWW	57.5619	6.68524	-22	0	0	0	42.2471	91.9735	0	0	0	91.9735	93.2018	0	0	0	93.2018	22.7819	22.7819	O,N,H	80.9124	6.68524	-22	0	0	0	65.5976	57.5619	6.68524	-22	0	0	0	42.2471	93.2018	6.68524	-22	0	0	0	77.8871
BC	C	SHS	42.7533	1.91667	-19	0	0	0	25.67	0	0	0	0	0	0	0	0	0	0	0	0				-19							-19							-19
BC	C	SHW	31.3965	9.16667	-8	0	0	0	32.5631	0	0	0	0	0	0	0	0	0	0	0	0				-8							-8							-8
BC	C	WDS	72.6236	1.34791	-40	0	0	0	33.9716	112.805	0	0	0	112.805	139.776	0	0	0	139.776	21.7114	21.7114	O,N,H	108.401	1.34791	-40	0	0	0	69.7493	72.6236	1.34791	-40	0	0	0	33.9716	139.776	1.34791	-40	0	0	0	101.124
BC	C	WDW	45.3327	7.05882	-14	0	0	0	38.3915	70.9946	0	0	0	70.9946	58.7307	0	0	0	58.7307	17.562	17.562	O,N,H	58.3526	7.05882	-14	0	0	0	51.4115	45.3327	7.05882	-14	0	0	0	38.3915	70.9946	7.05882	-14	0	0	0	64.0534
OC	C	EUS	-10.3067	0		0	0	0	-10.3067	-32.5427	0	0	0	-32.5427	-14.0486	0	0	0	-14.0486	-1.89181	-1.89181	O,N,H	-18.966	0	0	0	0	0	-18.966	-32.5427	0	0	0	0	0	-32.5427	-10.3067	0	0	0	0	0	-10.3067
OC	C	EUW	-3.58324	0		0	0	0	-3.58324	-19.4266	0	0	0	-19.4266	-6.32686	0	0	0	-6.32686	-0.672944	-0.672944	O,N,H	-9.77891	0	0	0	0	0	-9.77891	-19.4266	0	0	0	0	0	-19.4266	-3.58324	0	0	0	0	0	-3.58324
OC	C	CNS	-4.9057	0		0	0	0	-4.9057	-26.4743	0	0	0	-26.4743	-5.26245	0	0	0	-5.26245	-0.809399	-0.809399	O,N,H	-12.2141	0	0	0	0	0	-12.2141	-26.4743	0	0	0	0	0	-26.4743	-4.9057	0	0	0	0	0	-4.9057
OC	C	CNW	-3.67703	0		0	0	0	-3.67703	-10.8089	0	0	0	-10.8089	1.24793	0	0	0	1.24793	-0.997447	-0.997447	O,N,H	-4.41266	0	0	0	0	0	-4.41266	-10.8089	0	0	0	0	0	-10.8089	1.24793	0	0	0	0	0	1.24793
OC	C	RWS	-9.15947	0		0	0	0	-9.15947	-32.821	0	0	0	-32.821	-35.021	0	0	0	-35.021	-1.12283	-1.12283	O,N,H	-25.6672	0	0	0	0	0	-25.6672	-35.021	0	0	0	0	0	-35.021	-9.15947	0	0	0	0	0	-9.15947
OC	C	RWW	-10.0175	0		0	0	0	-10.0175	-31.8466	0	0	0	-31.8466	-25.2511	0	0	0	-25.2511	-1.60205	-1.60205	O,N,H	-22.3717	0	0	0	0	0	-22.3717	-31.8466	0	0	0	0	0	-31.8466	-10.0175	0	0	0	0	0	-10.0175
OC	C	SHS	-4.64774	0		0	0	0	-4.64774	0	0	0	0	0	0	0	0	0	0	0	0
OC	C	SHW	-3.48826	0		0	0	0	-3.48826	0	0	0	0	0	0	0	0	0	0	0	0
OC	C	WDS	-8.2983	0		0	0	0	-8.2983	-31.5118	0	0	0	-31.5118	-27.7765	0	0	0	-27.7765	-1.08596	-1.08596	O,N,H	-22.5289	0	0	0	0	0	-22.5289	-31.5118	0	0	0	0	0	-31.5118	-8.2983	0	0	0	0	0	-8.2983
OC	C	WDW	-7.78571	0		0	0	0	-7.78571	-25.0318	0	0	0	-25.0318	-16.0509	0	0	0	-16.0509	-1.37494	-1.37494	O,N,H	-16.2895	0	0	0	0	0	-16.2895	-25.0318	0	0	0	0	0	-25.0318	-7.78571	0	0	0	0	0	-7.78571
NH3	NH3	EUS	-1.3613	0		0	0	0	-1.3613	0	0	0	0	0	0	0	0	0	0	0	0	O	-1.3613	0	0	0	0	0	-1.3613	-1.3613	0	0	0	0	0	-1.3613	-1.3613	0	0	0	0	0	-1.3613
NH3	NH3	EUW	-0.887483	0		0	0	0	-0.887483	0	0	0	0	0	0	0	0	0	0	0	0	O	-0.887483	0	0	0	0	0	-0.887483	-0.887483	0	0	0	0	0	-0.887483	-0.887483	0	0	0	0	0	-0.887483
NH3	NH3	CNS	-0.661267	0		0	0	0	-0.661267	0	0	0	0	0	0	0	0	0	0	0	0	O	-0.661267	0	0	0	0	0	-0.661267	-0.661267	0	0	0	0	0	-0.661267	-0.661267	0	0	0	0	0	-0.661267
NH3	NH3	CNW	-1.26858	0		0	0	0	-1.26858	0	0	0	0	0	0	0	0	0	0	0	0	O	-1.26858	0	0	0	0	0	-1.26858	-1.26858	0	0	0	0	0	-1.26858	-1.26858	0	0	0	0	0	-1.26858
NH3	NH3	RWS	-0.518687	0		0	0	0	-0.518687	0	0	0	0	0	0	0	0	0	0	0	0	O	-0.518687	0	0	0	0	0	-0.518687	-0.518687	0	0	0	0	0	-0.518687	-0.518687	0	0	0	0	0	-0.518687
NH3	NH3	RWW	-0.809437	0		0	0	0	-0.809437	0	0	0	0	0	0	0	0	0	0	0	0	O	-0.809437	0	0	0	0	0	-0.809437	-0.809437	0	0	0	0	0	-0.809437	-0.809437	0	0	0	0	0	-0.809437
NH3	NH3	WDS	-0.618335	0		0	0	0	-0.618335	0	0	0	0	0	0	0	0	0	0	0	0	O	-0.618335	0	0	0	0	0	-0.618335	-0.618335	0	0	0	0	0	-0.618335	-0.618335	0	0	0	0	0	-0.618335
NH3	NH3	WDW	-0.935434	0		0	0	0	-0.935434	0	0	0	0	0	0	0	0	0	0	0	0	O	-0.935434	0	0	0	0	0	-0.935434	-0.935434	0	0	0	0	0	-0.935434	-0.935434	0	0	0	0	0	-0.935434
Ship_All	Multiple	SHS	-3.42618	0.023	-0.0771305	1.0937	-1.89106	-0.649492	-4.92716	-5.48069	1.06334	-1.73114	-0.580418	-6.7289	-2.96835	1.21797	-1.43488	-0.494172	-3.67944	-1.71692	-1.71692	O,N,H	-3.95841	0.023	-0.0771305	1.125	-1.68569	-0.574694	-5.14792	-5.48069	0.023	-0.0771305	1.06334	-1.89106	-0.649492	-7.01203	-2.96835	0.023	-0.0771305	1.21797	-1.43488	-0.494172	-3.73357
Ship_All	Multiple	SHW	-2.25007	0.11	-0.0330153	0.974295	-2.34546	-0.80556	-4.34981	-4.28201	1.02197	-2.12469	-0.605313	-5.99004	-3.04386	1.09536	-1.7915	-0.61699	-4.35699	-1.48787	-1.48787	O,N,H	-3.19198	0.11	-0.0330153	1.03054	-2.08722	-0.675954	-4.84762	-4.28201	0.11	-0.0330153	0.974295	-2.34546	-0.80556	-6.38175	-2.25007	0.11	-0.0330153	1.09536	-1.7915	-0.605313	-3.47454
CH4	CH4	Summer	-0.0253333	0		0.699715	2.03728	0	2.71166	0.123399	0.462483	1.37939	0	1.96527	0.310359	0.415212	1.20561	0	1.93118	0	0	O,N,H	0.112558	0	0	0.493328	1.50298	0	2.10887	-0.0253333	0	0	0.395902	1.20561	0	1.57618	0.310359	0	0	0.699715	2.03728	0	3.04736
CH4	CH4	Winter	0	0		0	0	0	0	0.041808	0.395902	1.38964	0	1.82735	0	0	0	0	0	0	0			0	0						0	0						0	0
